# Supplementary material for: Molecular docking simulation studies on potent butyrylcholinesterase inhibitors obtained from microbial transformation of dihydrotestosterone
Source: PubMed Central journal article supplement (PMC4126177; doi:10.1186/1752-153x-7-164), 2013-10-08

AVANCE 400-B  
LAB. No. 109

SALMAN/DR. IQBAL/DHT-1/CD3OD/

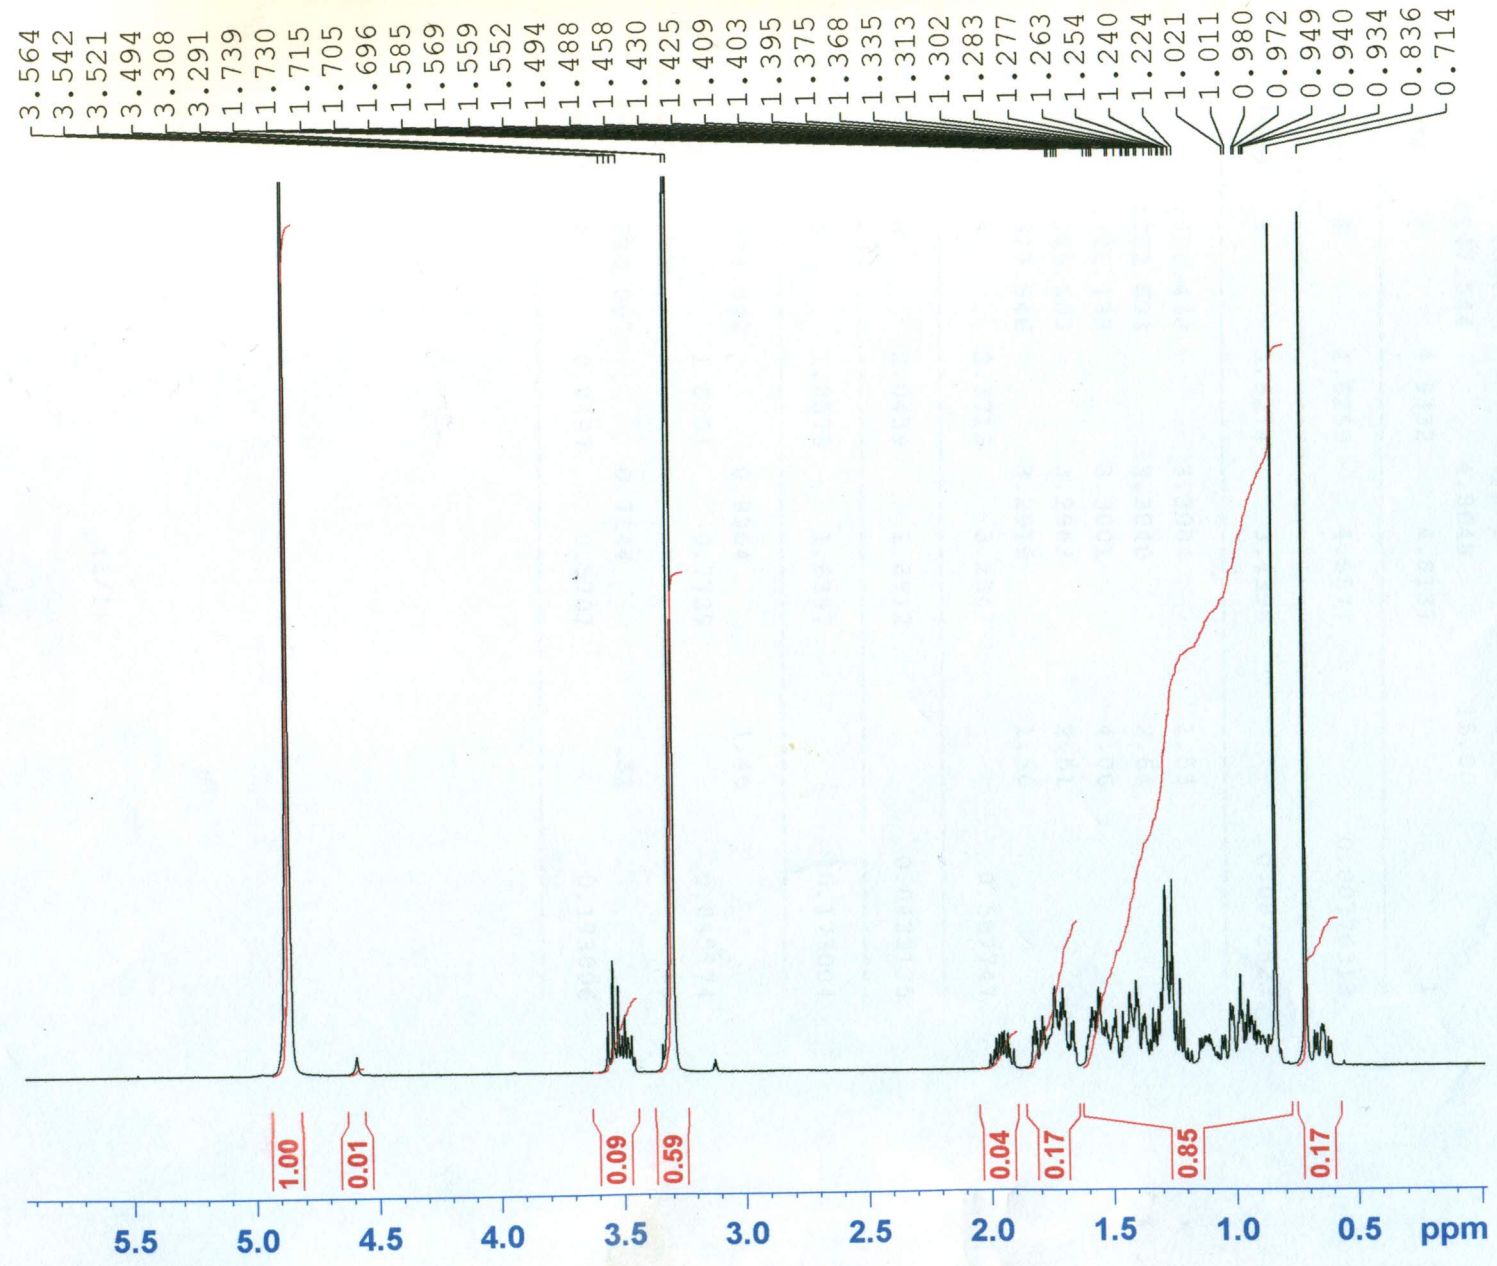

```

NAME          jan01
EXPNO         5
PROCNO       1
Date_        20090101
Time         12.11
INSTRUM      spect
PROBHD       5 mm DUL 13C-1
PULPROG      zg30
TD           32768
SOLVENT      MeOD
NS           128
DS           0
SWH          8012.820 Hz
FIDRES       0.244532 Hz
AQ           2.0447731 sec
RG           512
DW           62.400 usec
DE           6.50 usec
TE           300.0 K
D1           1.00000000 sec
TD0          1

===== CHANNEL f1 =====
NUC1          1H
P1            11.90 usec
PL1          -2.00 dB
SFO1         400.3332026 MHz
SI           16384
SF           400.3300099 MHz
WDW          EM
SSB          0
LB           0.30 Hz
GB           0
PC           1.00
  
```

Salman/Prof. Iqbal  
Sample: DHT=1

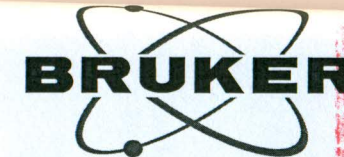

82.65  
82.53  
71.94  
71.82  
67.19  
56.01  
55.89  
52.45  
52.35  
49.58  
49.44  
49.29  
49.15  
49.01  
48.87  
48.72  
48.58  
46.38  
46.28  
46.16  
44.12  
38.91  
38.28  
38.17  
38.07  
36.93  
36.70  
32.90  
32.13

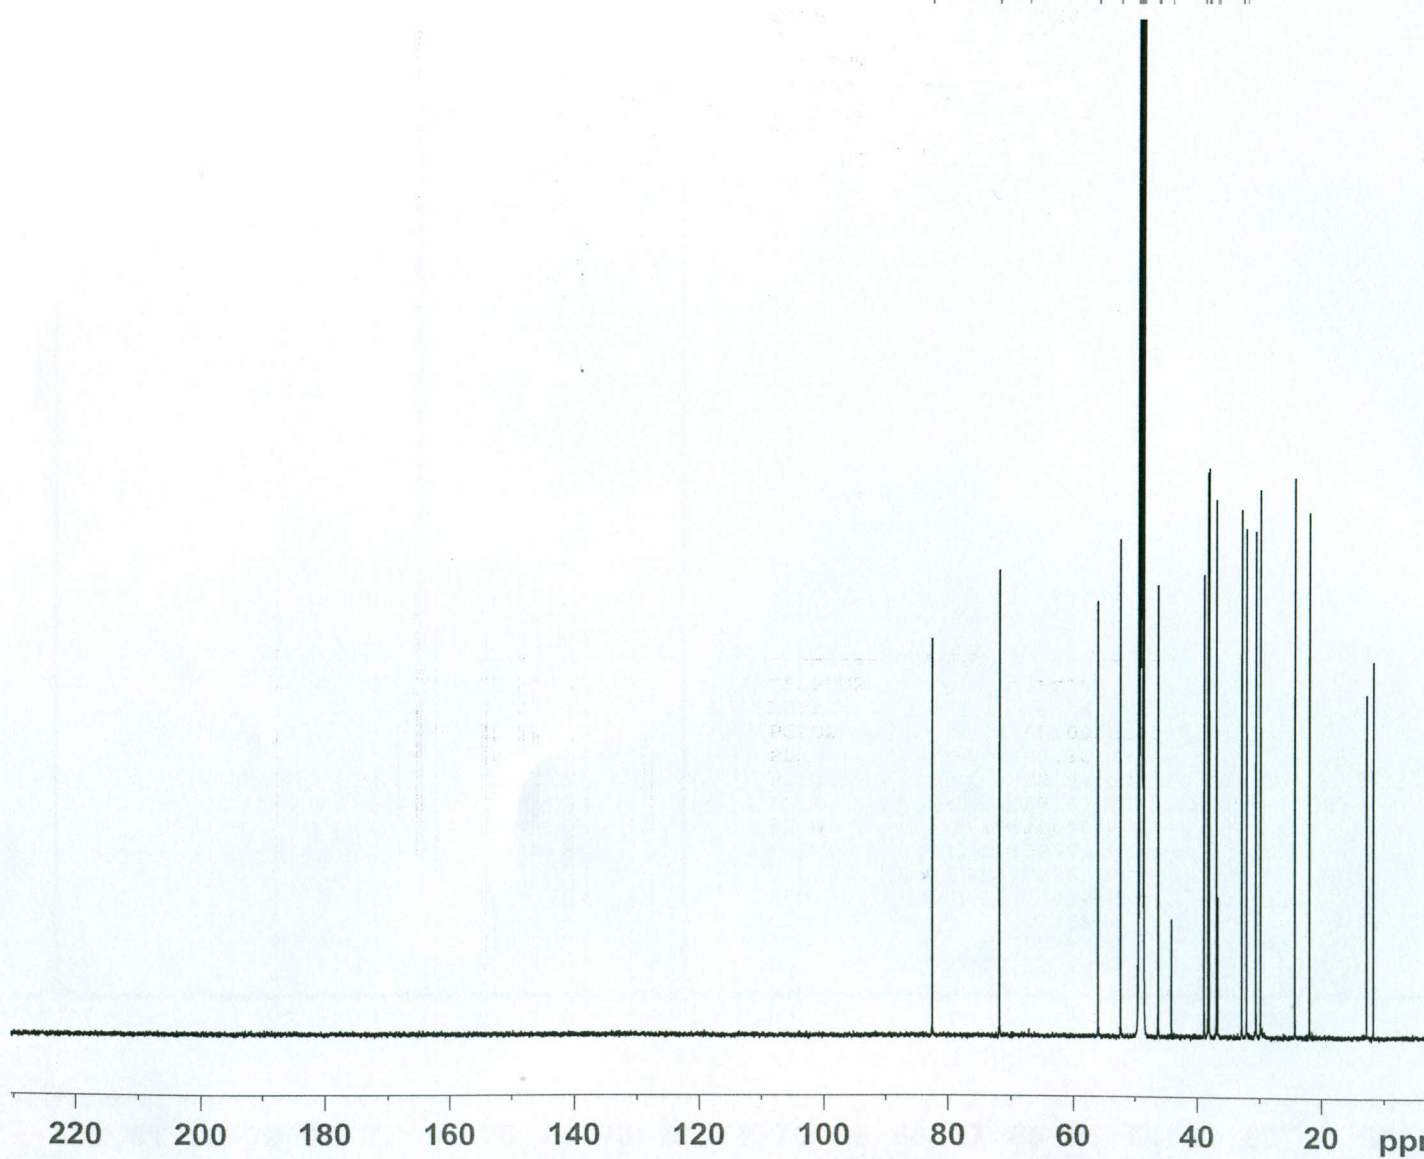

NAME FEB06  
EXPNO 6  
PROCNO 1  
Date\_ 20090206  
Time 21.37  
INSTRUM spect  
PROBHD 5 mm CPTCI 1H-  
PULPROG zgpg  
TD 65536  
SOLVENT MeOD  
NS 12288  
DS 2  
SWH 35971.223 Hz  
FIDRES 0.548877 Hz  
AQ 0.9110143 sec  
RG 32768  
DW 13.900 usec  
DE 6.50 usec  
TE 291.1 K  
D1 1.5000000 sec  
D11 0.0300000 sec  
TD0 12

==== CHANNEL f1 =====  
NUC1 13C  
P1 16.00 usec  
PL1 2.00 dB  
PL1W 66.40702820 W  
SFO1 150.9453107 MHz

==== CHANNEL f2 =====  
CPDPRG2 waltz16  
NUC2 1H  
PCPD2 65.00 usec  
PL2 3.30 dB  
PL12 22.06 dB  
PL13 27.00 dB  
PL2W 9.16420078 W  
PL12W 0.12192553 W  
PL13W 0.03909260 W  
SFO2 600.2336014 MHz  
SI 32768  
SF 150.9277397 MHz  
WDW EM  
SSB 0  
LB 1.00 Hz  
GB 0  
PC 1.40

Salman/Prof. Iqbal  
 Sample: DHT=1

ANCE AV 500  
 B. No. 105

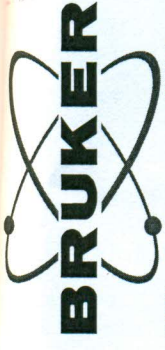

NAME FEB06  
 EXPNO 7  
 PROCNO 1  
 Date\_ 20090207  
 Time\_ 6.07  
 INSTRUM spect  
 PROBHD 5 mm CPTCI 1H-  
 PULPROG deptsp135  
 TD 65536  
 SOLVENT MeOD  
 NS 4708  
 DS 2  
 SWH 30303.031 Hz  
 FIDRES 0.462388 Hz  
 AQ 1.0814105 sec  
 RG 32768  
 DW 16.500 usec  
 DE 6.50 usec  
 TE 290.7 K  
 CNST2 145.0000000  
 D1 1.50000000 sec  
 D2 0.00344828 sec  
 D12 0.00002000 sec  
 TD0 6

==== CHANNEL f1 =====  
 NUC1 13C  
 P1 16.00 usec  
 P12 2000.00 usec  
 PL0 120.00 dB  
 PL1 2.00 dB  
 PLOW 0.00000000 W  
 PL1W 66.40702820 W  
 SFO1 150.9430463 MHz  
 SP2 1.99 dB  
 SPNAM2 Crp60comp.4  
 SPOAL2 0.500  
 SPOFFS2 0.00 Hz

==== CHANNEL f2 =====  
 CPDPRG2 waltz16  
 NUC2 1H  
 P3 7.50 usec  
 P4 15.00 usec  
 PCPD2 65.00 usec  
 PL2 3.30 dB  
 PL12 22.06 dB  
 PL12W 9.16420078 W  
 PL12W 0.12192553 W  
 SFO2 600.2324009 MHz  
 SI 32768  
 SF 150.9277397 MHz  
 WDW EM  
 SSB 0  
 LB 1.00 Hz  
 GB 0  
 PC 1.40

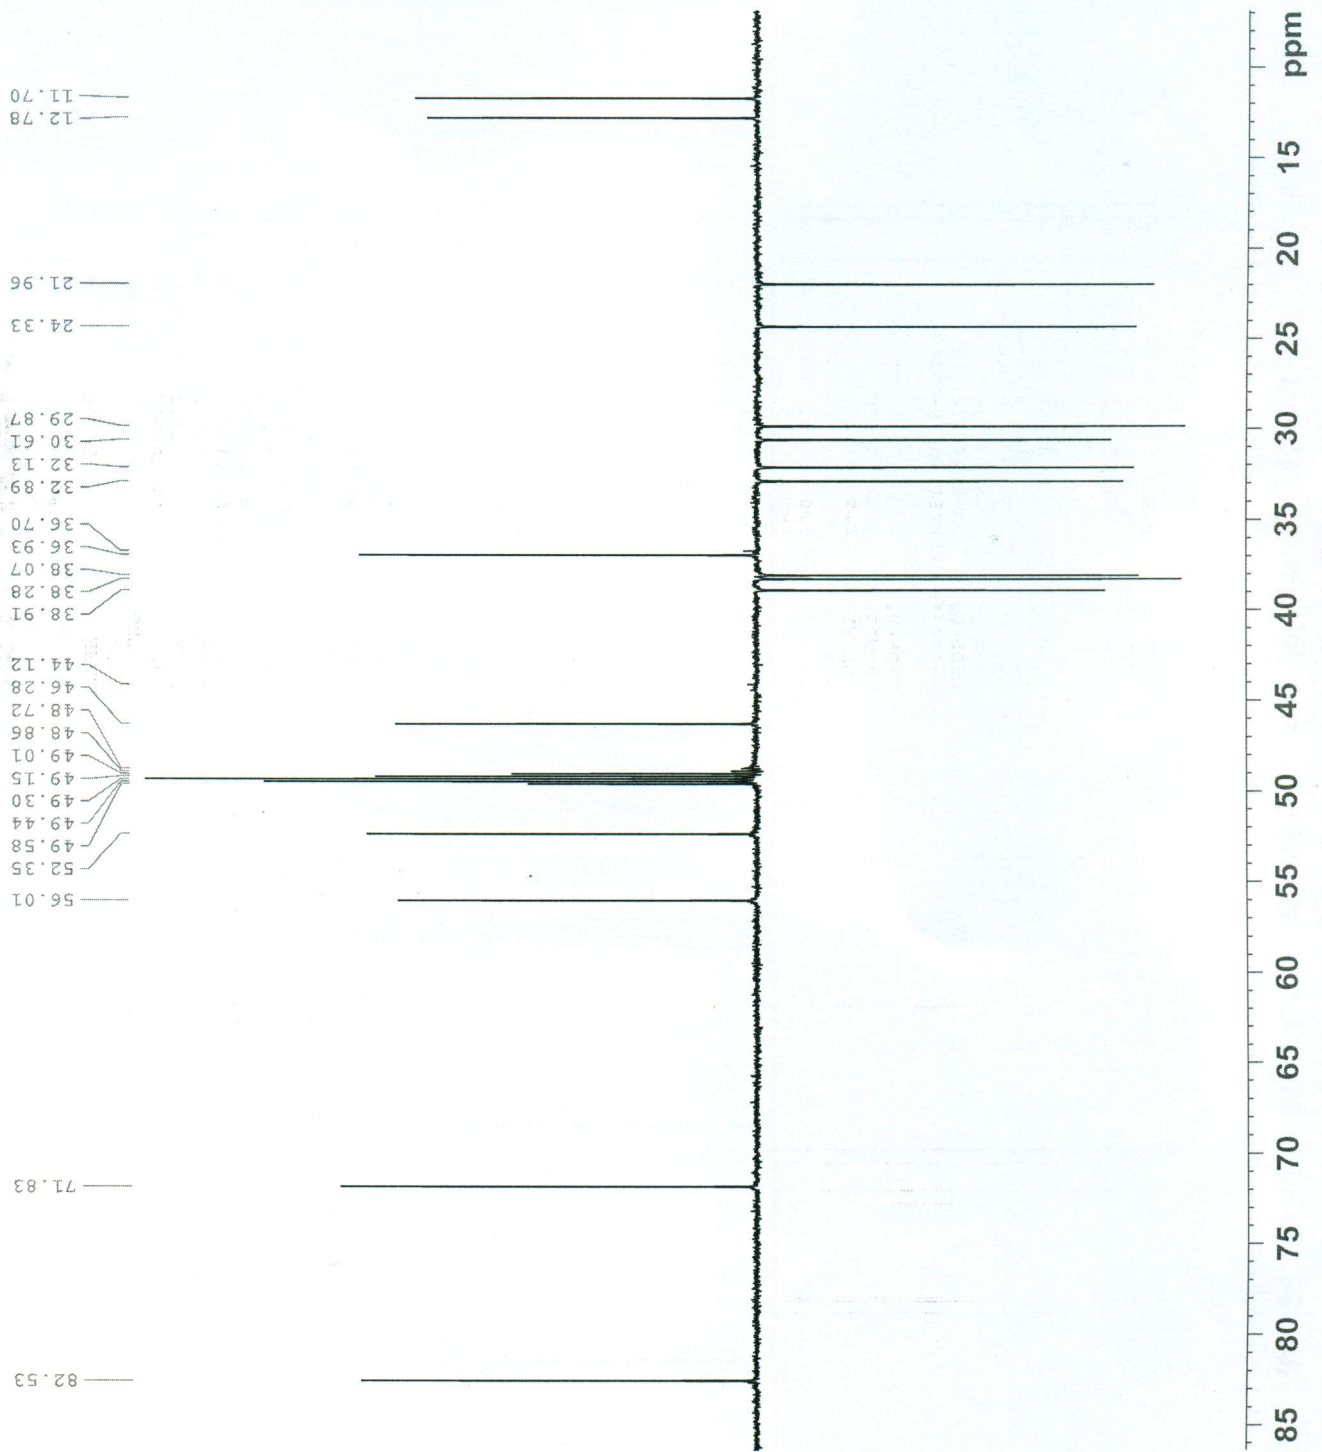

Salman/Prof. Iqbal  
 Sample: DHT=1

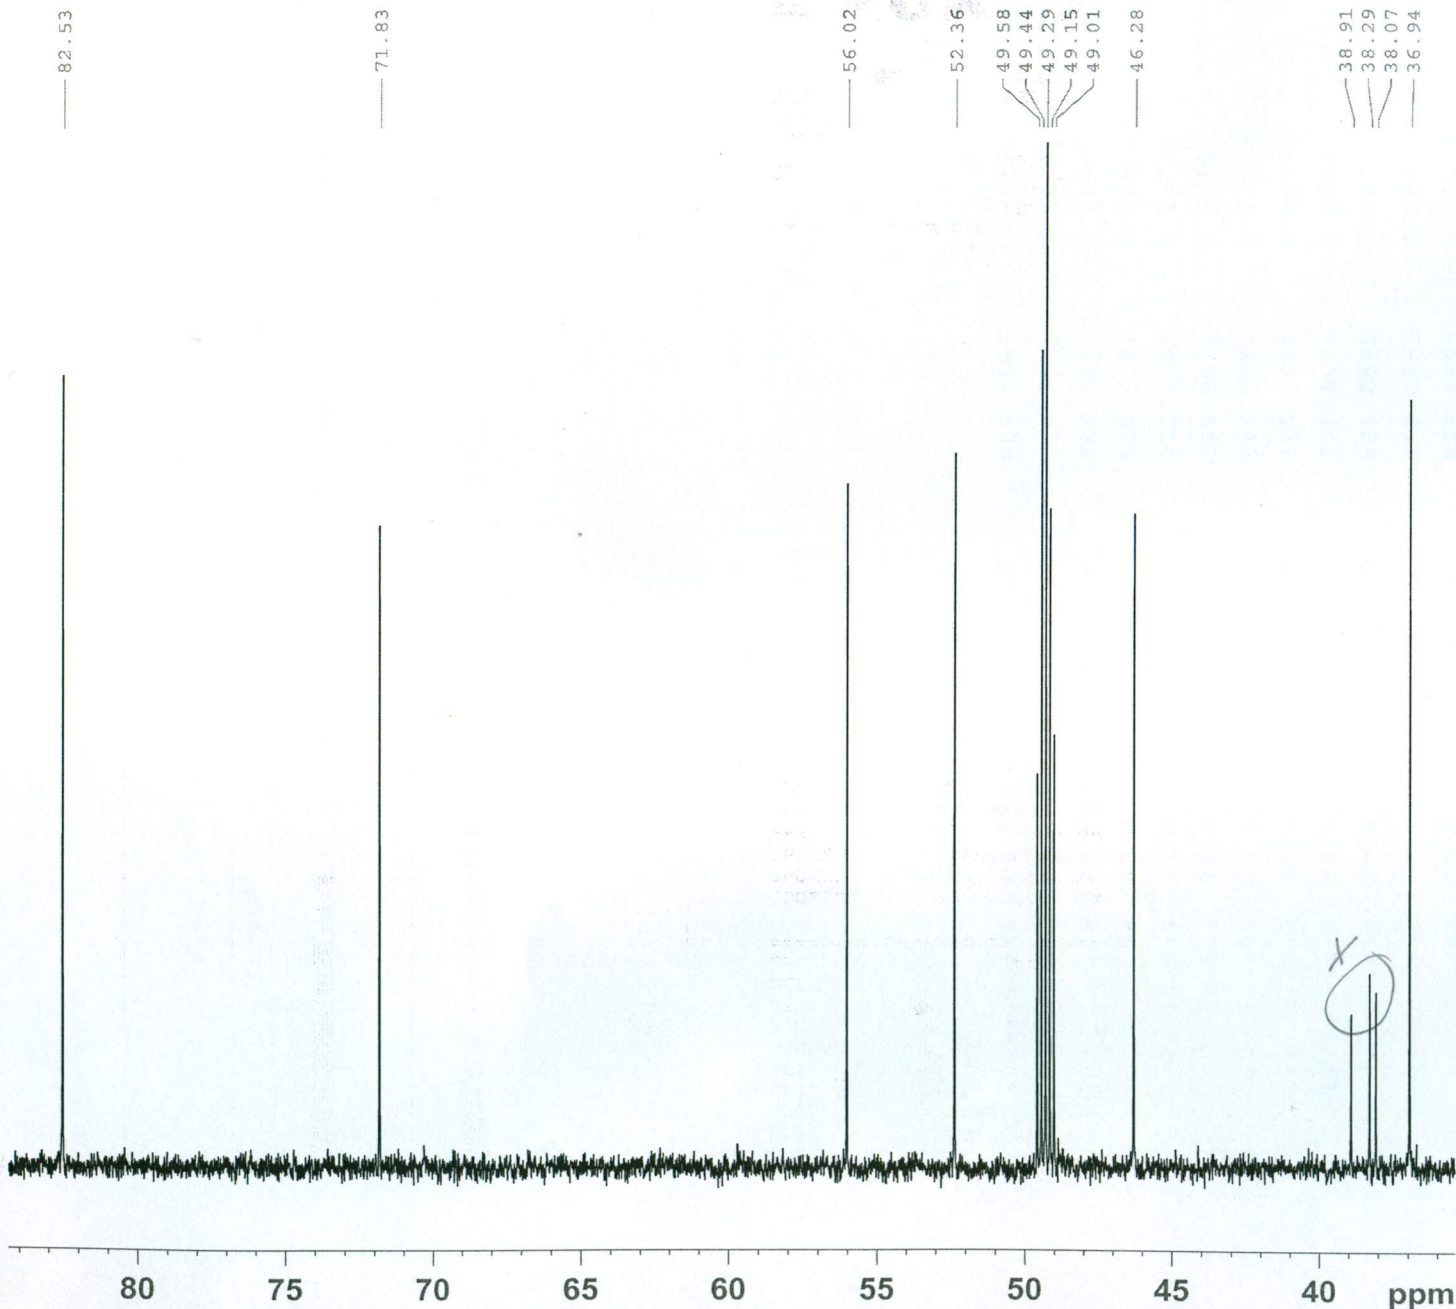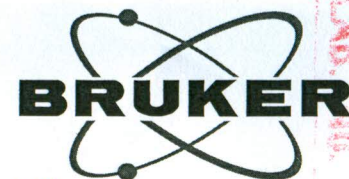

LAP No. 100  
 009 M 600

NAME FEB06  
 EXPNO 8  
 PROCNO 1  
 Date\_ 20090207  
 Time 9.16  
 INSTRUM spect  
 PROBHD 5 mm CPTCI 1H-  
 PULPROG deptsp90  
 TD 65536  
 SOLVENT MeOD  
 NS 634  
 DS 2  
 SWH 30303.031 Hz  
 FIDRES 0.462388 Hz  
 AQ 1.0814105 sec  
 RG 32768  
 DW 16.500 usec  
 DE 6.50 usec  
 TE 292.6 K  
 CNST2 145.0000000  
 D1 1.50000000 sec  
 D2 0.00344828 sec  
 D12 0.00002000 sec  
 TD0 6

==== CHANNEL f1 =====  
 NUC1 13C  
 P1 16.00 usec  
 P12 2000.00 usec  
 PL0 120.00 dB  
 PL1 2.00 dB  
 PL0W 0.00000000 W  
 PL1W 66.40702820 W  
 SFO1 150.9430463 MHz  
 SP2 1.99 dB  
 SPNAM2 Crp60comp.4  
 SPOAL2 0.500  
 SPOFFS2 0.00 Hz

==== CHANNEL f2 =====  
 CPDPRG2 waltz16  
 NUC2 1H  
 P3 7.50 usec  
 P4 15.00 usec  
 PCPD2 65.00 usec  
 PL2 3.30 dB  
 PL12 22.06 dB  
 PL2W 9.16420078 W  
 PL12W 0.12192553 W  
 SFO2 600.2324009 MHz  
 SI 32768  
 SF 150.9277397 MHz  
 WDW EM  
 SSB 0  
 LB 1.00 Hz  
 GB 0  
 PC 1.40



Salman/Prof. Iqbal  
Sample: DHT-1

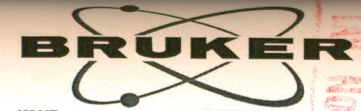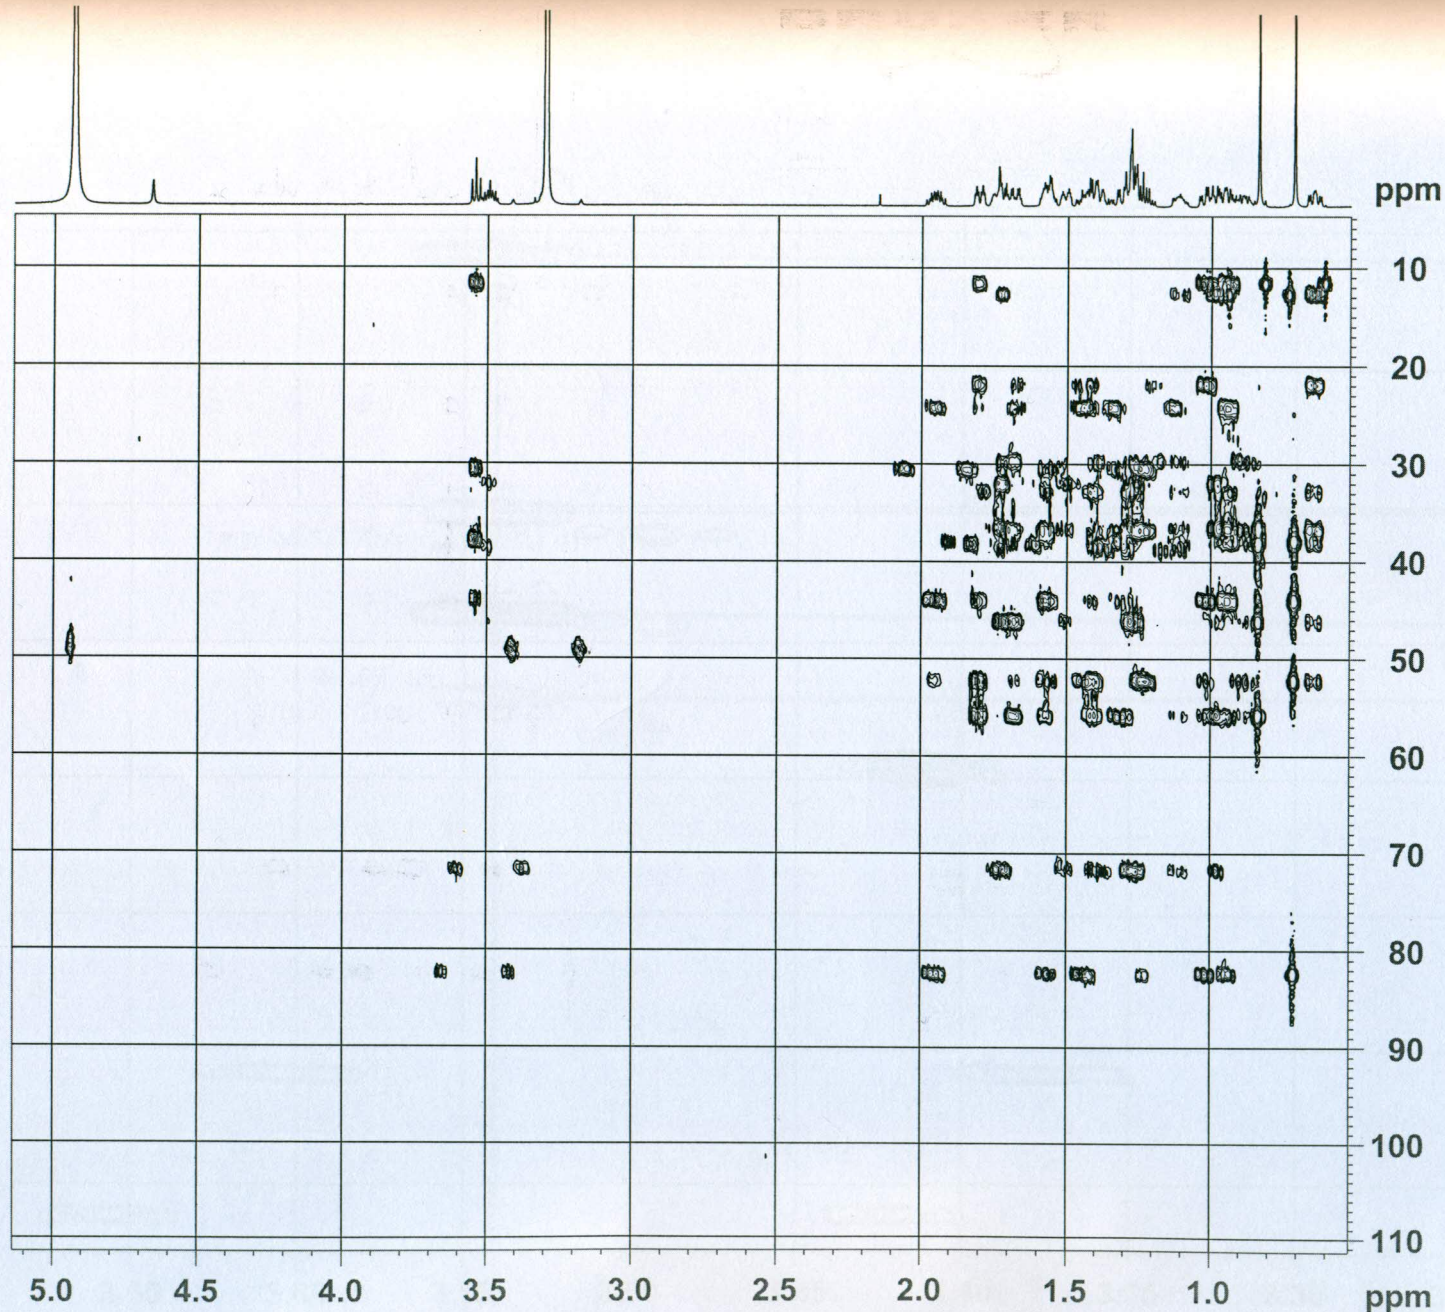

NAME FEB06  
EXPNO 5  
PROCNO 1  
Date\_ 20090206  
Time 15.55  
INSTRUM spect  
PROBHD 5 mm CPTCI 1H-  
PULPROG hmbcgp1pndqf  
TD 4096  
SOLVENT MeOD  
NS 32  
DS 8  
SWH 3180.662 Hz  
FIDRES 0.776529 Hz  
AQ 0.6440984 sec  
RG 32768  
DW 157.200 usec  
DE 6.50 usec  
TE 291.8 K  
CNST2 145.0000000  
CNST13 13.0000000  
D0 0.0000300 sec  
D1 1.5000000 sec  
D2 0.00344828 sec  
D6 0.03846154 sec  
D16 0.00015000 sec  
IN0 0.00001440 sec

==== CHANNEL f1 =====  
NUC1 1H  
P1 7.40 usec  
P2 14.80 usec  
PL1 3.30 dB  
PL1W 9.16420078 W  
SFO1 600.2318007 MHz

==== CHANNEL f2 =====  
NUC2 13C  
P3 10.00 usec  
PL2 2.00 dB  
PL2W 66.40702820 W  
SFO2 150.9453107 MHz

===== GRADIENT CHANNEL =====  
GPNAM1 SINE.100  
GPNAM2 SINE.100  
GPNAM3 SINE.100  
GPZ1 50.00 %  
GPZ2 30.00 %  
GPZ3 40.10 %  
P16 2000.00 usec  
ND0 2  
TD 256  
SFO1 150.9453 MHz  
FIDRES 135.614929 Hz  
SW 230.000 ppm  
FnMODE QF  
SI 1024  
SF 600.2300157 MHz  
WDW SINE  
SSB 0  
LB 0.00 Hz  
GB 0  
PC 1.40  
SI 1024  
MC2 QF  
SF 150.9277397 MHz  
WDW SINE  
SSB 0  
LB 0.00 Hz  
GB 0

ANCE AV 600  
 No. 108

**BRUKER**

NAME FEB06  
 EXPNO 2  
 PROCNO 1  
 Date\_ 20090206  
 Time 9.18  
 INSTRUM spect  
 PROBDH 5 mm CPTCI LH-  
 PULPROG cosygpgqf  
 TD 2048  
 SOLVENT MeOD  
 NS 8  
 DS 4  
 SWH 3180.662 Hz  
 FIDRES 1.553057 Hz  
 AQC 0.3221528 sec  
 RG 181  
 DW 157.200 usec  
 DE 6.50 usec  
 TE 293.0 K  
 D0 0.00000300 sec  
 D1 1.48689198 sec  
 D13 0.00000400 sec  
 D16 0.00015000 sec  
 INO 0.00031440 sec

===== CHANNEL f1 =====  
 NUC1 LH  
 P0 7.40 usec  
 P1 7.40 usec  
 PL1 3.30 dB  
 PL1W 9.16420078 W  
 SF01 600.2318007 MHz

===== GRADIENT CHANNEL =====  
 GPNAMI SINE.100  
 GPZ1 10.00 %  
 P16 2000.00 usec  
 NDO 1  
 TD 256  
 SF01 600.2318 MHz  
 FIDRES 12.424461 Hz  
 SW 5.299 ppm  
 FMODE QF  
 SI 1024  
 SF 600.2300157 MHz  
 QSSINE 0  
 LB 0.00 Hz  
 SSB 0  
 GB 1.40  
 PC 1.024  
 SI 1024  
 MC2 QF  
 SF 600.2300157 MHz  
 QSSINE 0  
 LB 0.00 Hz  
 GB 0

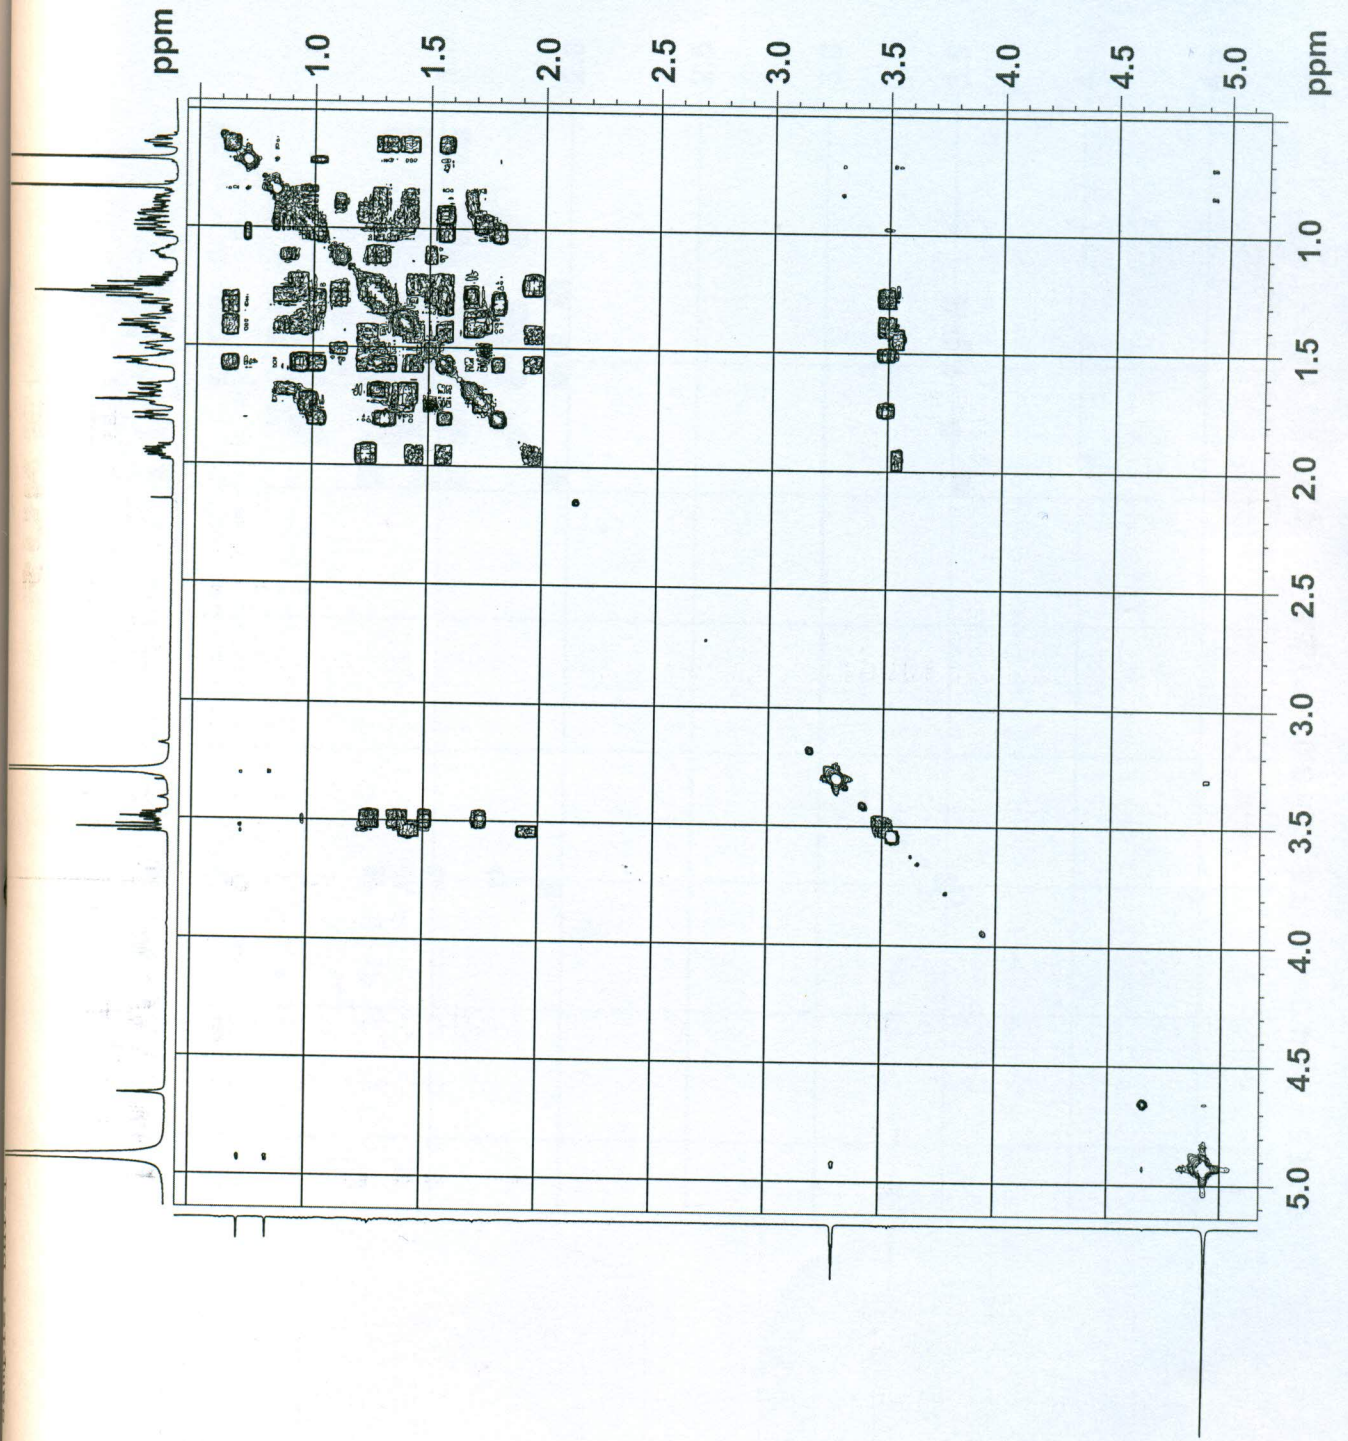

Sample: DHT=1

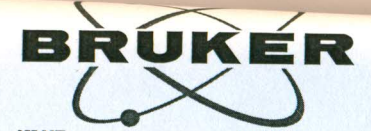

NAME FEB06  
 EXPNO 3  
 PROCNO 1  
 Date\_ 20090206  
 Time 10.22  
 INSTRUM spect  
 PROBHD 5 mm CPTCI 1H-  
 PULPROG noesygpph  
 TD 1024  
 SOLVENT MeOD  
 NS 8  
 DS 4  
 SWH 3180.662 Hz  
 FIDRES 3.106115 Hz  
 AQ 0.1611800 sec  
 RG 90.5  
 DW 157.200 usec  
 DE 6.50 usec  
 TE 293.0 K  
 D0 0.00014778 sec  
 D1 2.00000000 sec  
 D8 0.80000001 sec  
 D16 0.00015000 sec  
 INO 0.00031440 sec

CHANNEL 100  
 No. 108

===== CHANNEL f1 =====  
 NUC1 1H  
 P1 7.40 usec  
 P2 14.80 usec  
 PL1 3.30 dB  
 PL1W 9.16420078 W  
 SFO1 600.2318007 MHz

===== GRADIENT CHANNEL =====  
 GPNAM1 SINE.100  
 GPNAM2 SINE.100  
 GPZ1 40.00 %  
 GPZ2 -40.00 %  
 P16 2000.00 usec  
 ND0 1  
 TD 256  
 SFO1 600.2318 MHz  
 FIDRES 12.424461 Hz  
 SW 5.299 ppm  
 FhMODE States-TPPI  
 SI 1024  
 SF 600.2300157 MHz  
 WDW QSINE  
 SSB 2  
 LB 0.00 Hz  
 GB 0  
 PC 1.40  
 SI 1024  
 MC2 States-TPPI  
 SF 600.2300157 MHz  
 WDW QSINE  
 SSB 2  
 LB 0.00 Hz  
 GB 0

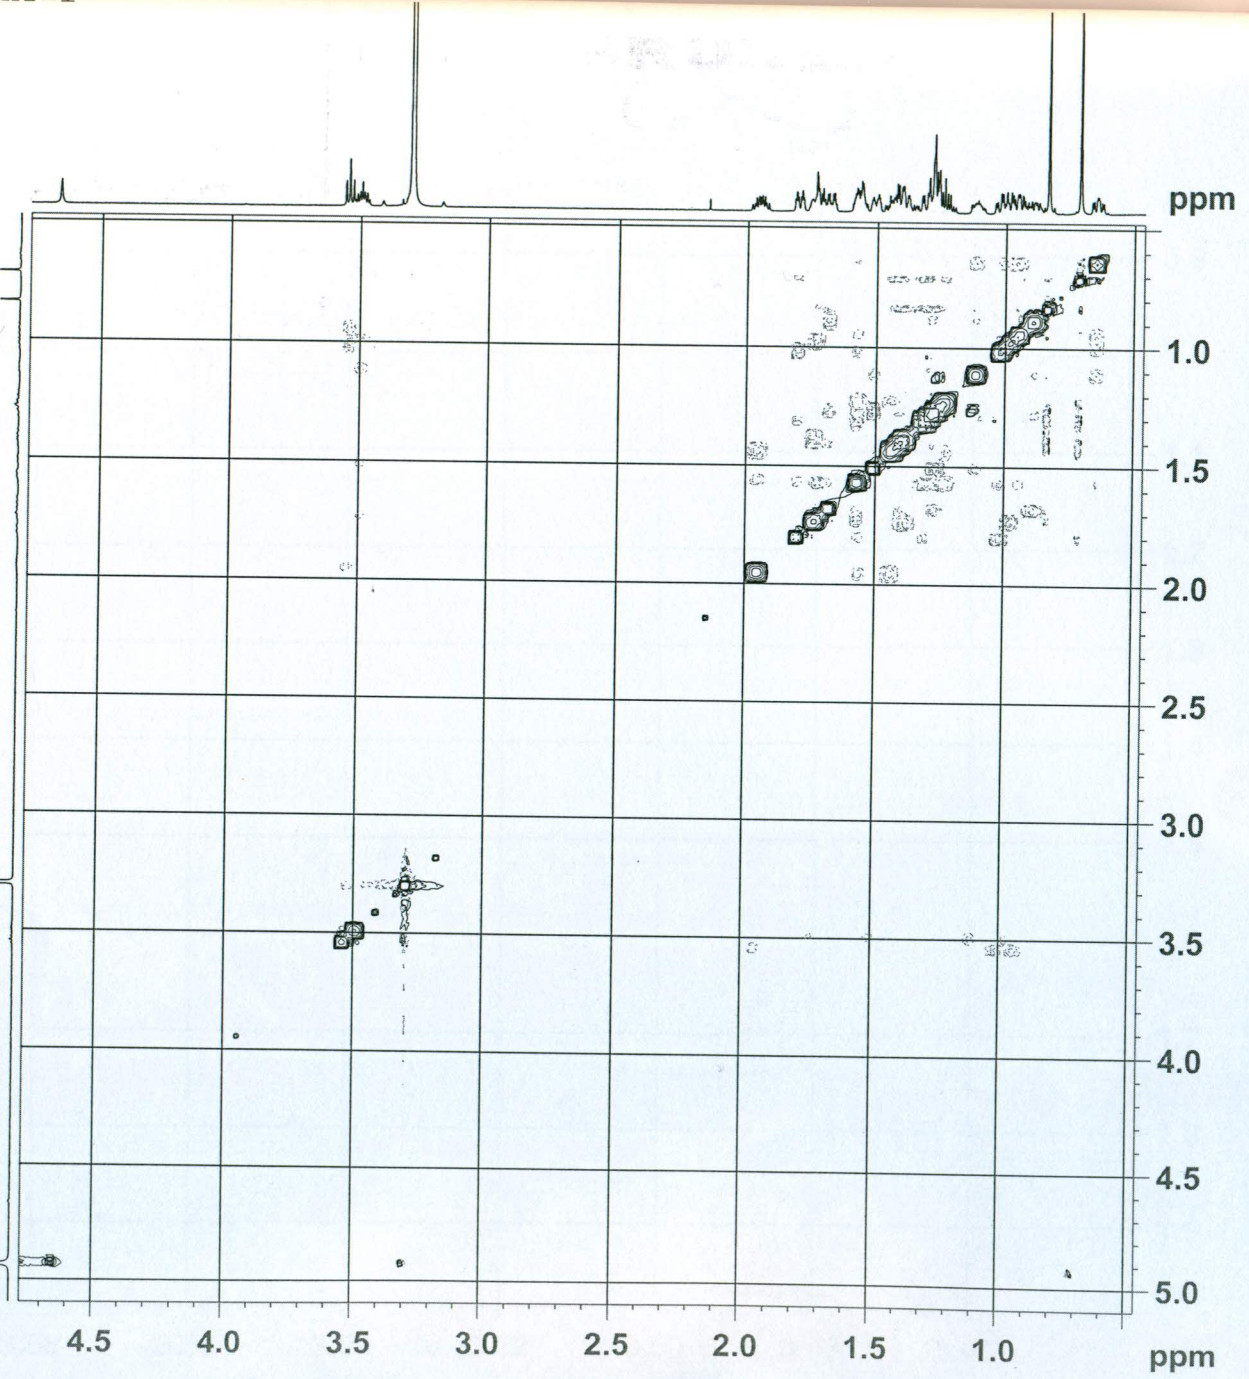

Supplement: 1752-153X-7-164-S1.pdf [file 1752-153X-7-164-S1.pdf]
