# Supplementary material for: Molecular docking simulation studies on potent butyrylcholinesterase inhibitors obtained from microbial transformation of dihydrotestosterone
Source: PubMed Central journal article supplement (PMC4126177; doi:10.1186/1752-153x-7-164), 2013-10-08

AVANCE 400-B  
LAB. No. 109

SALMAN ZAFAR/DR. IQBAL/DTC-B2/CD30D

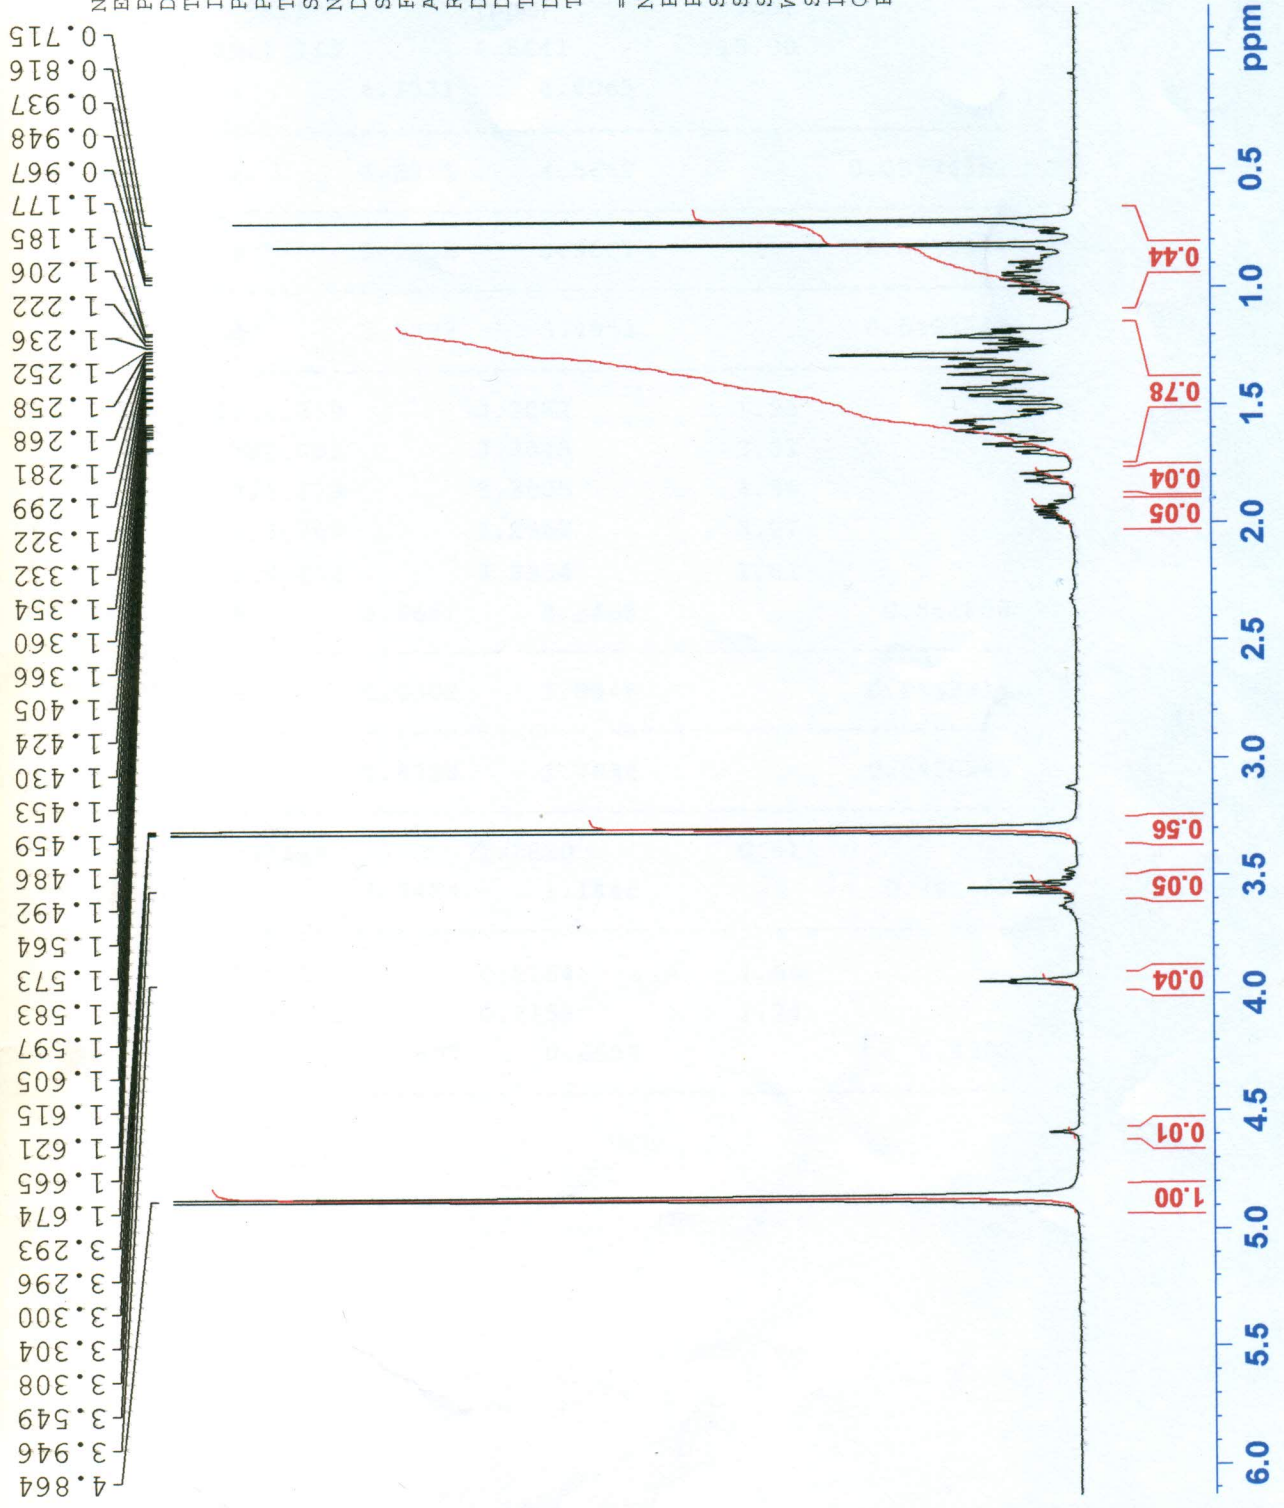

NAME febl1  
EXPNO 2  
PROCNO 1  
Date\_ 20090211  
Time 10.42  
INSTRUM spect  
PROBHD 5 mm DUL 13C-1  
PULPROG zg30  
TD 32768  
SOLVENT MeOD  
NS 128  
DS 0  
SWH 8012.820 Hz  
FIDRES 0.244532 Hz  
AQ 2.0447731 sec  
RG 456.1  
DW 62.400 usec  
DE 6.50 usec  
TE 300.0 K  
D1 1.00000000 sec  
TD0 1

==== CHANNEL f1 =====  
NUC1 1H  
P1 11.90 usec  
PL1 -2.00 dB  
SFO1 400.3332026 MHz  
SI 16384  
SF 400.3300099 MHz  
WDW EM  
SSB 0  
LB 0.30 Hz  
GB 0  
PC 1.00

Salman/Dr, Iqbal/BB/  
Cd3od/DTC-B2/

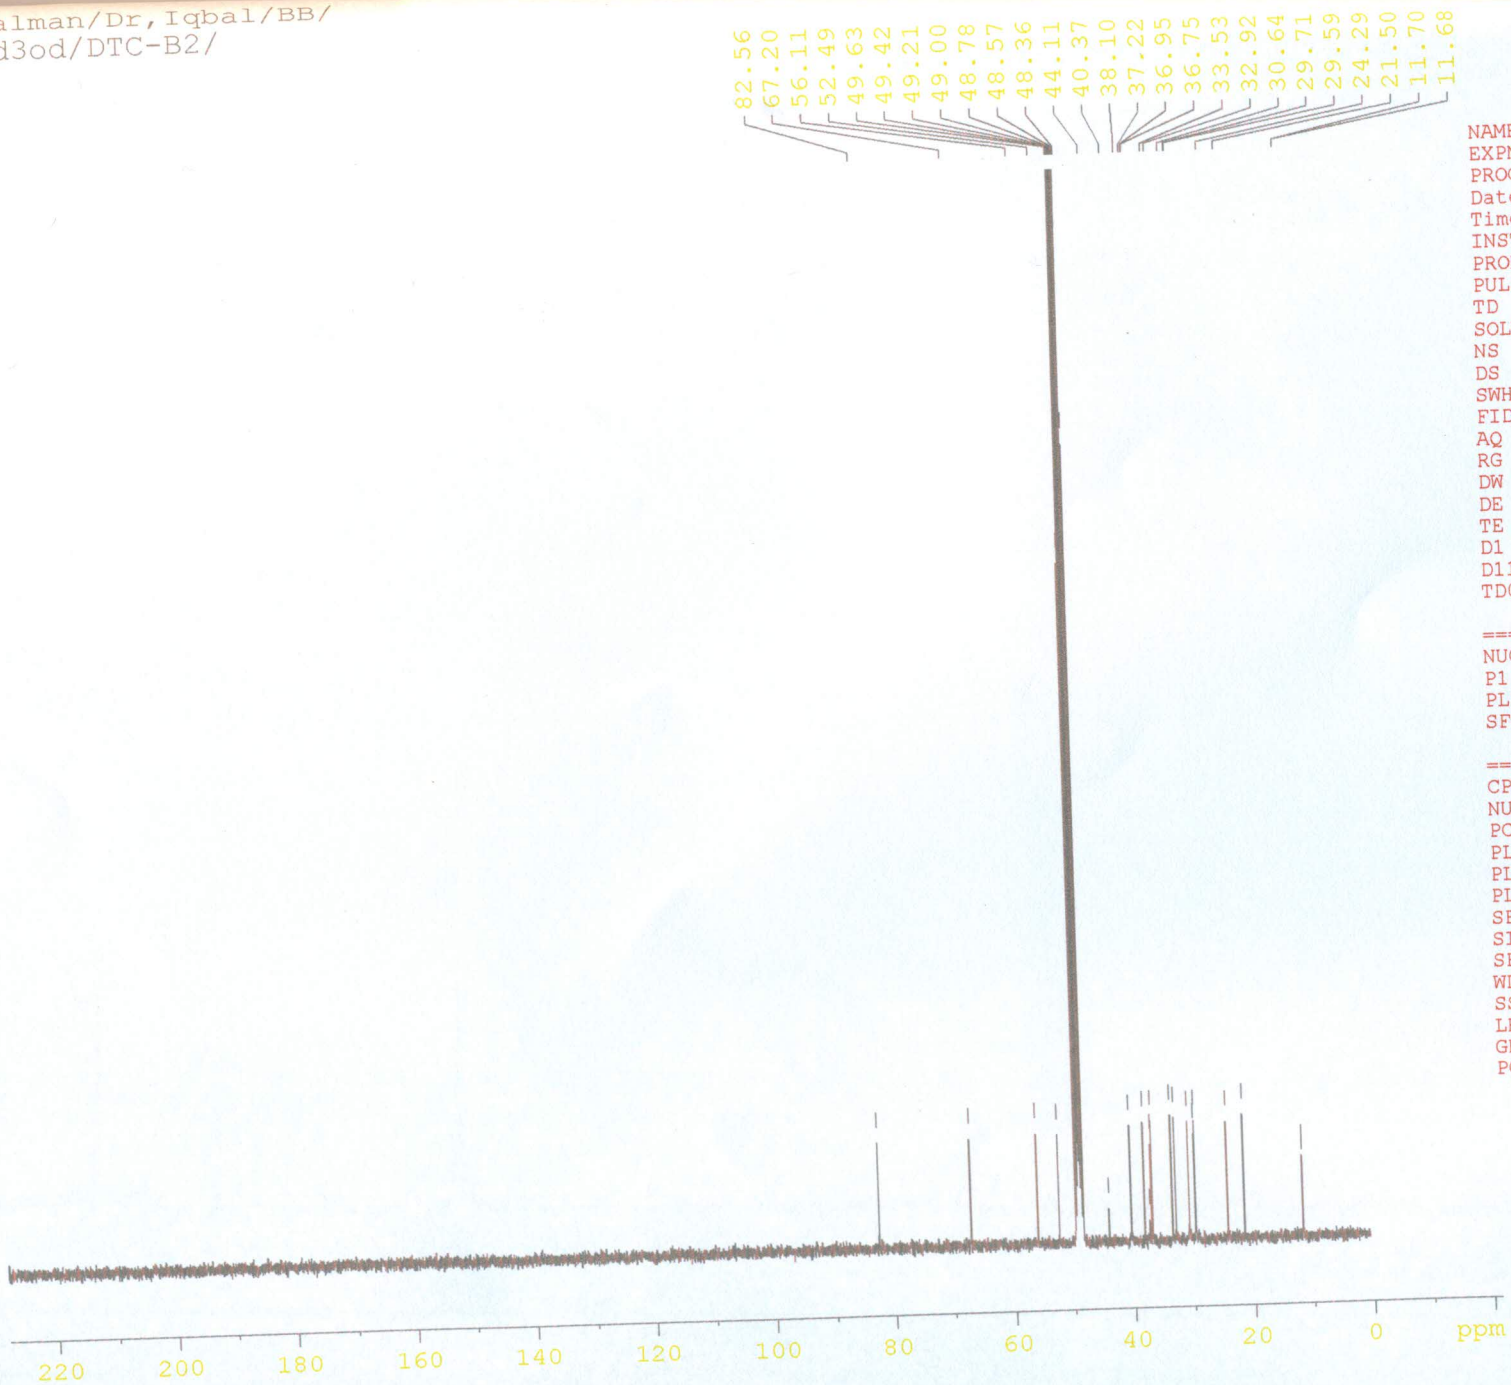

NAME feb25  
EXPNO 11  
PROCNO 1  
Date\_ 20090225  
Time 15.50  
INSTRUM spect  
PROBHD 5 mm Dual 13C/  
PULPROG zgpg  
TD 32768  
SOLVENT MeOD  
NS 27648  
DS 2  
SWH 24154.590 Hz  
FIDRES 0.737140 Hz  
AQ 0.6783476 sec  
RG 32768  
DW 20.700 usec  
DE 6.50 usec  
TE 298.6 K  
D1 1.50000000 sec  
D11 0.03000000 sec  
TDO 27

===== CHANNEL f1 =====  
NUC1 13C  
P1 14.20 usec  
PL1 3.00 dB  
SFO1 100.6498899 MHz

===== CHANNEL f2 =====  
CPDPRG2 waltz16  
NUC2 1H  
PCPD2 100.00 usec  
PL2 4.00 dB  
PL12 25.83 dB  
PL13 25.83 dB  
SFO2 400.2320011 MHz  
SI 16384  
SF 100.6377708 MHz  
WDW EM  
SSB 0  
LB 1.00 Hz  
GB 0  
PC 1.40

400-A  
No. 109

Salman/Dr, Iqbal/Cd3od/  
Dept-135/DTC-B2

400-A  
No. 109

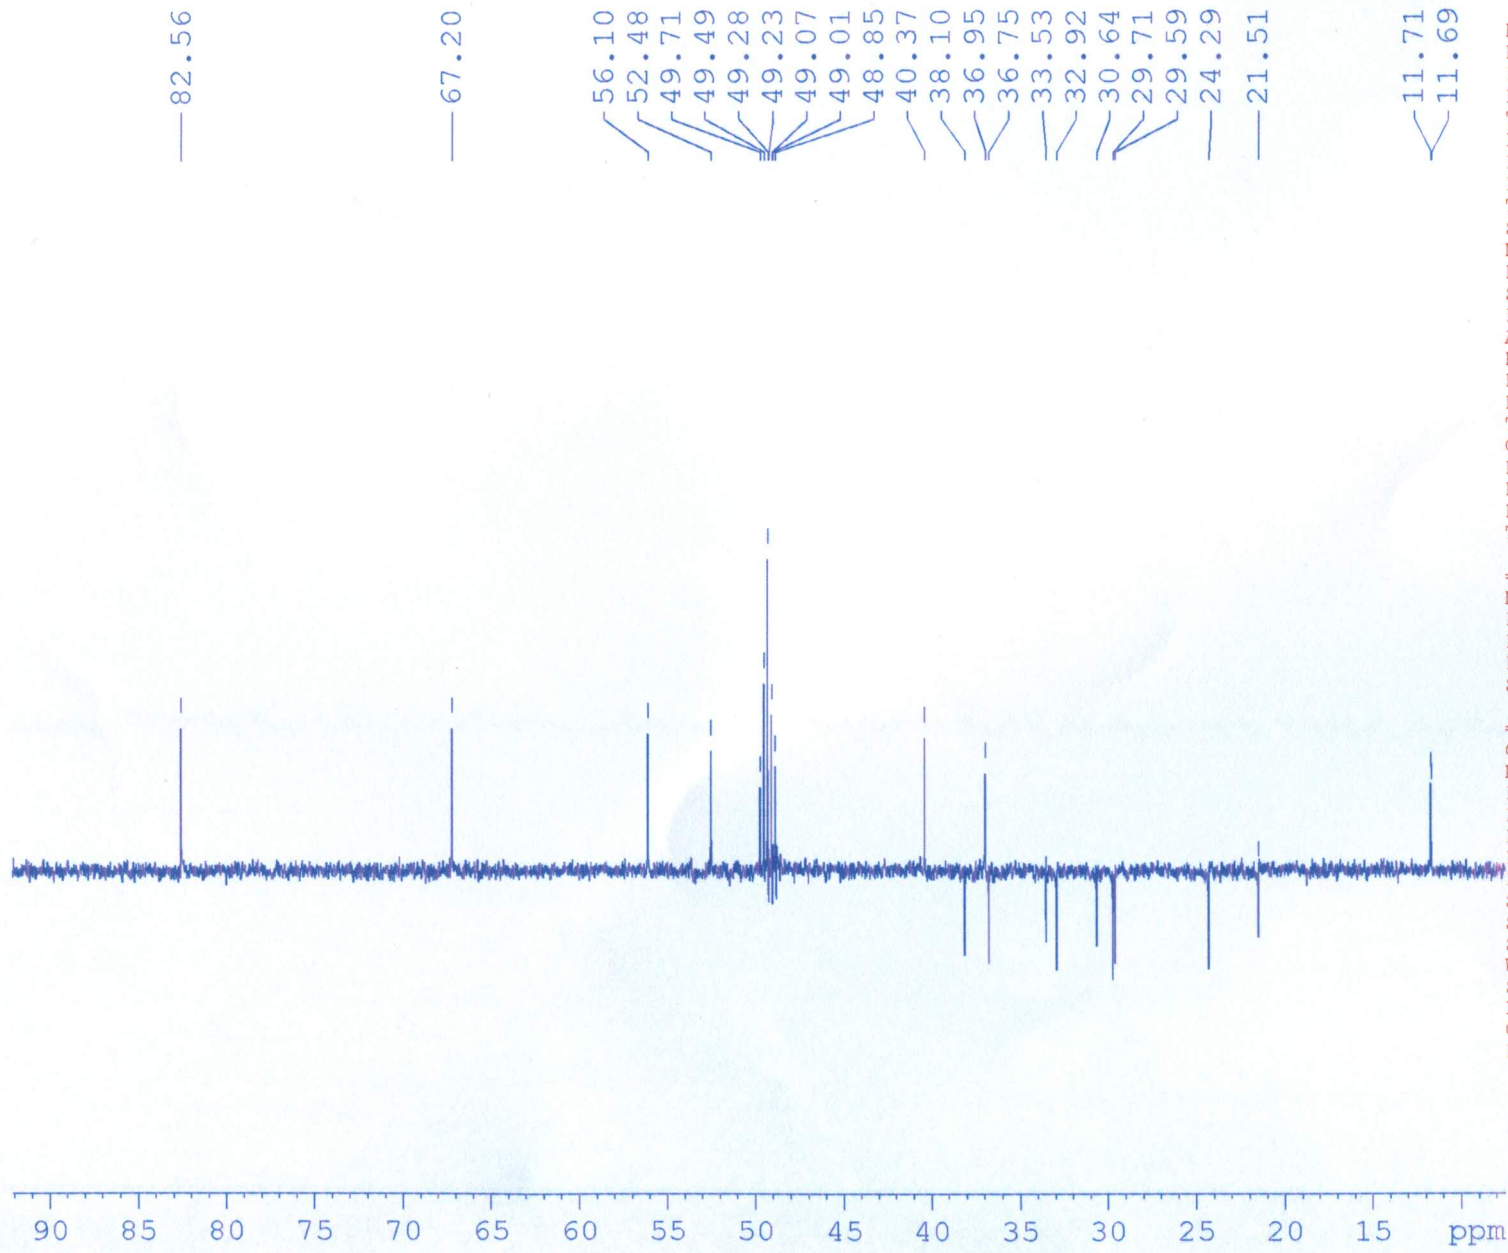

NAME feb26  
EXPNO 7  
PROCNO 1  
Date 20090226  
Time 11.59  
INSTRUM spect  
PROBHD 5 mm Dual 13C/  
PULPROG dept135  
TD 32768  
SOLVENT MeOD  
NS 20480  
DS 2  
SWH 19157.088 Hz  
FIDRES 0.584628 Hz  
AQ 0.8552948 sec  
RG 16384  
DW 26.100 usec  
DE 6.50 usec  
TE 298.0 K  
CNST2 145.0000000  
D1 1.50000000 sec  
D2 0.00344828 sec  
D12 0.00002000 sec  
TDO 20

===== CHANNEL f1 =====  
NUC1 13C  
P1 14.20 usec  
P2 28.40 usec  
PL1 3.00 dB  
SFO1 100.6474746 MHz

===== CHANNEL f2 =====  
CPDPRG2 waltz16  
NUC2 1H  
P3 8.10 usec  
P4 16.20 usec  
PCPD2 100.00 usec  
PL2 4.00 dB  
PL12 25.83 dB  
SFO2 400.2320011 MHz  
SI 16384  
SF 100.6377708 MHz  
WDW EM  
SSB 0  
LB 1.00 Hz  
GB 0  
PC 1.40

No. 400-A  
No. 109

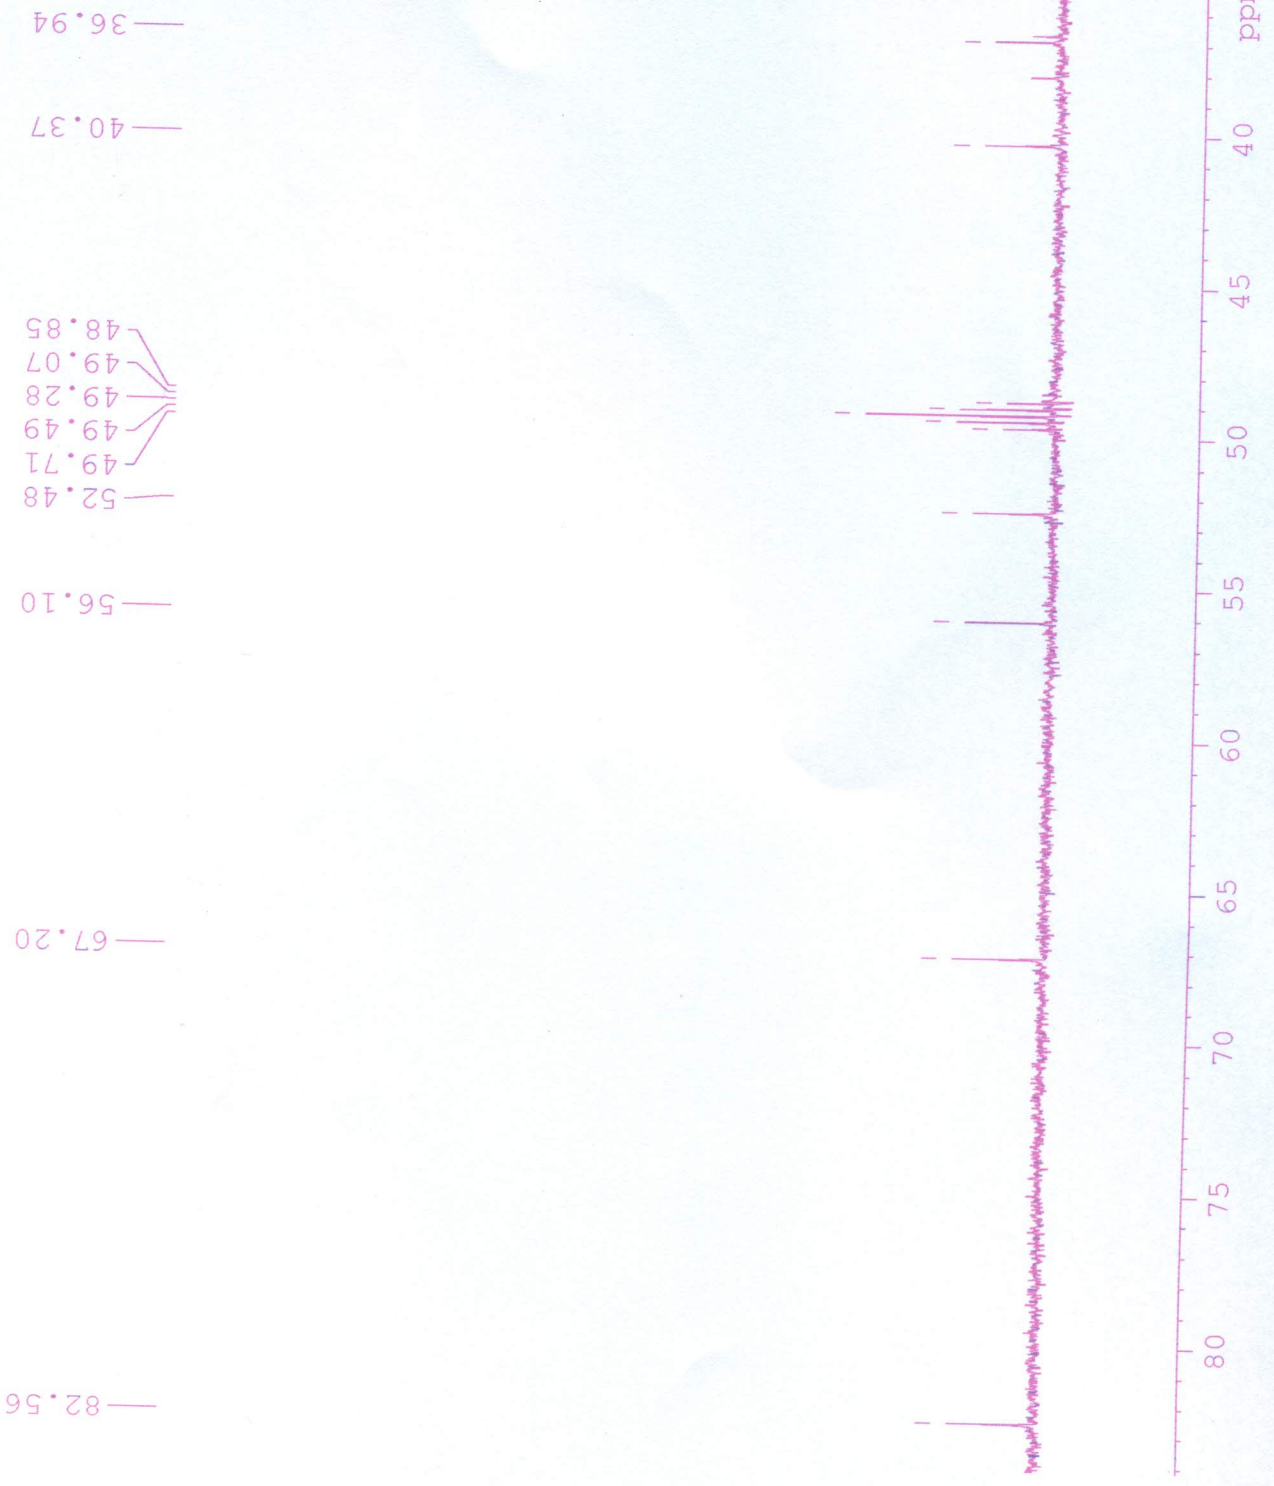

```

NAME          EXPNO          PROCNO
EXPNO         8              1
PROCNO        1
Date_         20090227
Time_         1.38
INSTRUM       spect
PROBHD        5 mm Dual 13C/
PULPROG       dept90
TD            32768
SOLVENT       MeOD
NS            8192
DS            2
SWH           19157.088 Hz
FIDRES        0.584628 Hz
AQ            0.8552948 sec
RG            16384
DW            26.100 usec
DE            6.50 usec
TE            297.5 K
CNST2         145.0000000
D1            1.5000000 sec
D2            0.00344828 sec
D12           0.00002000 sec
TD0           8

===== CHANNEL f1 =====
NUC1          13C
P1            14.20 usec
P2            28.40 usec
PL1           3.00 dB
SFO1          100.6474746 MHz

===== CHANNEL f2 =====
CPDPRG2       waltz16
NUC2          1H
P3            8.10 usec
P4            16.20 usec
PCPD2         100.00 usec
PL2           4.00 dB
PL12          25.83 dB
SFO2          400.2320011 MHz
SI            16384
SF            100.6377708 MHz
WDW           EM
SSB           0
LB            1.00 Hz
GB            0
PC            1.40
    
```

Sample: DTC=B2

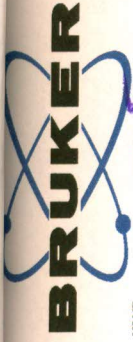

LAB. No. 118

NAME FEB24  
 EXENO 4  
 PROCNO 1  
 DATE 15749  
 TIME 1524  
 INSTRUM spect  
 PROBHD 5 mm TXI 1H-13  
 PULPROG hmcgcpd1f  
 TD 1024  
 SOLVENT MeOD  
 NS 32  
 DS 8  
 SWH 2693.966 Hz  
 FIDRES 2.630826 Hz  
 AQ 0.1902900 sec  
 RG 32768  
 DW 185.600 usec  
 DE 6.50 usec  
 TE 296.9 K  
 CNST2 145.000000  
 D0 0.0000300 sec  
 D1 1.5000000 sec  
 D2 0.00344828 sec  
 D12 0.0002000 sec  
 D13 0.0000400 sec  
 D16 0.00015000 sec  
 INO 0.00002090 sec

===== CHANNEL f1 =====  
 NUC1 1H  
 P1 7.40 usec  
 PL1 14.80 usec  
 PL2 3.00 dB  
 SF01 500.2315007 MHz

===== CHANNEL f2 =====  
 CPDPRG2 gart  
 NUC2 13C  
 P3 12.70 usec  
 PCPD2 100.00 usec  
 PL2 -4.00 dB  
 PL12 25.00 dB  
 SF02 125.7948834 MHz

===== GRADIENT CHANNEL =====  
 GPNAM1 SINE.100  
 GPNAM2 SINE.100  
 GPNAM3 SINE.100  
 GPX1 0.00  
 GPX2 0.00  
 GPY1 0.00  
 GPY2 0.00  
 GPY3 0.00  
 GPZ1 50.00  
 GPZ2 30.00  
 GPZ3 40.10  
 P16 1500.00 usec  
 ND0 2  
 TD 256  
 SF01 125.7949 MHz  
 FIDRES 93.363388 Hz  
 SW 190.000 ppm  
 FmMODE OF  
 SI 1024  
 SF 500.2300120 MHz  
 SSB 0  
 SINE 0  
 WDW 0.00 Hz  
 LB 0  
 GB 0  
 PC 1.00  
 SI 512  
 MC2 OF  
 SF 125.7827554 MHz  
 WDW 0  
 SSB 0  
 LB 0  
 GB 0

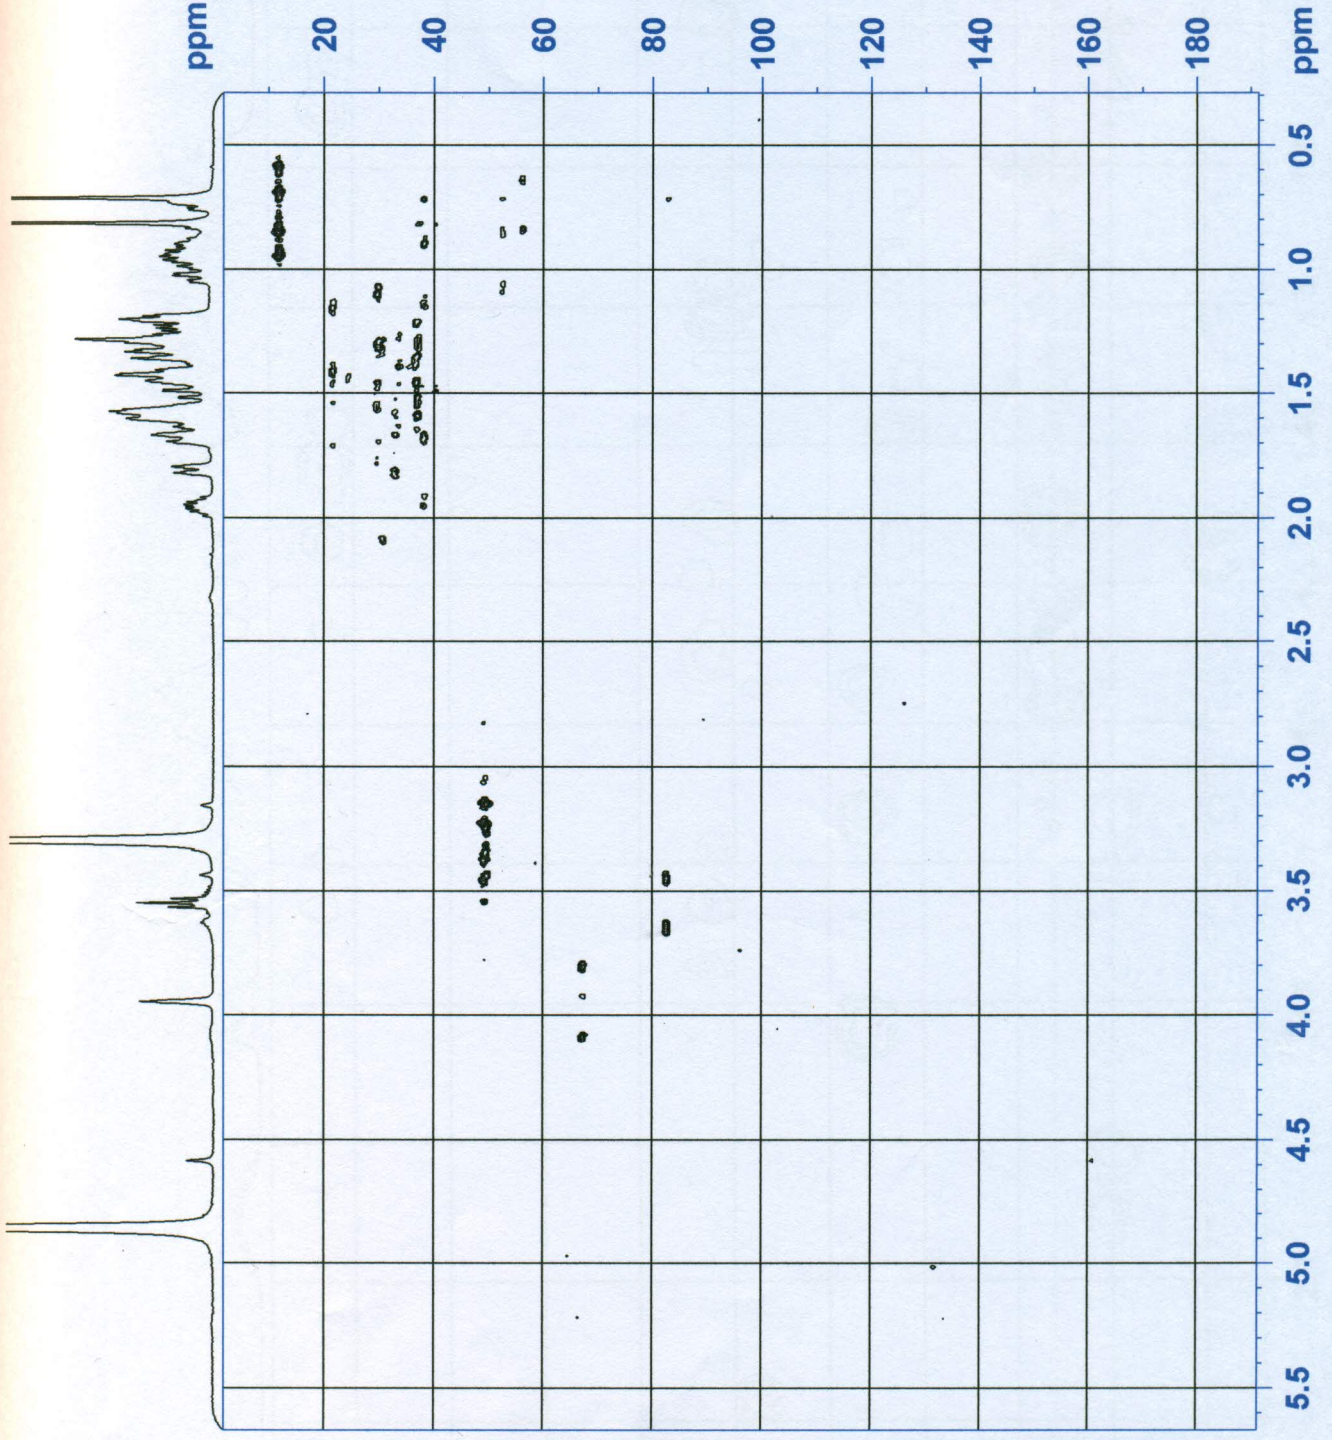

Sample: DIC-B2

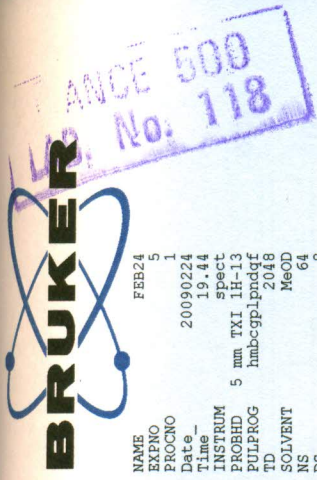

NAME  
 EXPNO 5  
 PROCNO 1  
 Date 20090224  
 Time 19.44  
 INSTRUM spect  
 PROBHD 5 mm TXI 1H-13  
 PULPROG hmbcpg1pndgf  
 TD 2048  
 SOLVENT MeOD  
 NS 64  
 DS 8  
 SWH 2693.966 Hz  
 FIDRES 1.315413 Hz  
 AQ 0.3803444 sec  
 RG 32768  
 DW 185.600 usec  
 DE 6.50 usec  
 TE 297.1 K  
 CNST2 145.0000000  
 CNST13 10.0000000  
 D0 0.00000300 sec  
 D1 1.50000000 sec  
 D2 0.00344828 sec  
 D6 0.05000000 sec  
 D16 0.00015000 sec  
 IN0 0.00001690 sec

CHANNEL f1  
 NUC1 1H  
 P1 7.40 usec  
 P2 14.80 usec  
 PL1 3.00 dB  
 SFO1 500.2315007 MHz  
 CHANNEL f2  
 NUC2 13C  
 P3 12.70 usec  
 PL2 -4.00 dB  
 SFO2 125.7974871 MHz

GRADIENT CHANNEL  
 GENAM1 SINE.100  
 GENAM2 SINE.100  
 GENAM3 SINE.100  
 GEX1 0.00 %  
 GEX2 0.00 %  
 GEX3 0.00 %  
 GXY1 0.00 %  
 GXY2 0.00 %  
 GXY3 0.00 %  
 GFZ1 50.00 %  
 GFZ2 30.00 %  
 GFZ3 40.10 %  
 P16 1500.00 usec  
 NDO 2  
 TD 256  
 SFO1 125.7975 MHz  
 FIDRES 115.478165 Hz  
 SW 235.000 ppm  
 FMODE QF  
 SI 2048  
 SF 500.2300120 MHz  
 SINE SINE  
 SSB 0  
 LB 0.00 Hz  
 GB 0  
 PC 1.00  
 SI 512  
 NC2 QF  
 SF 125.7827654 MHz  
 SINE SINE  
 SSB 0  
 LB 0.00 Hz  
 GB 0

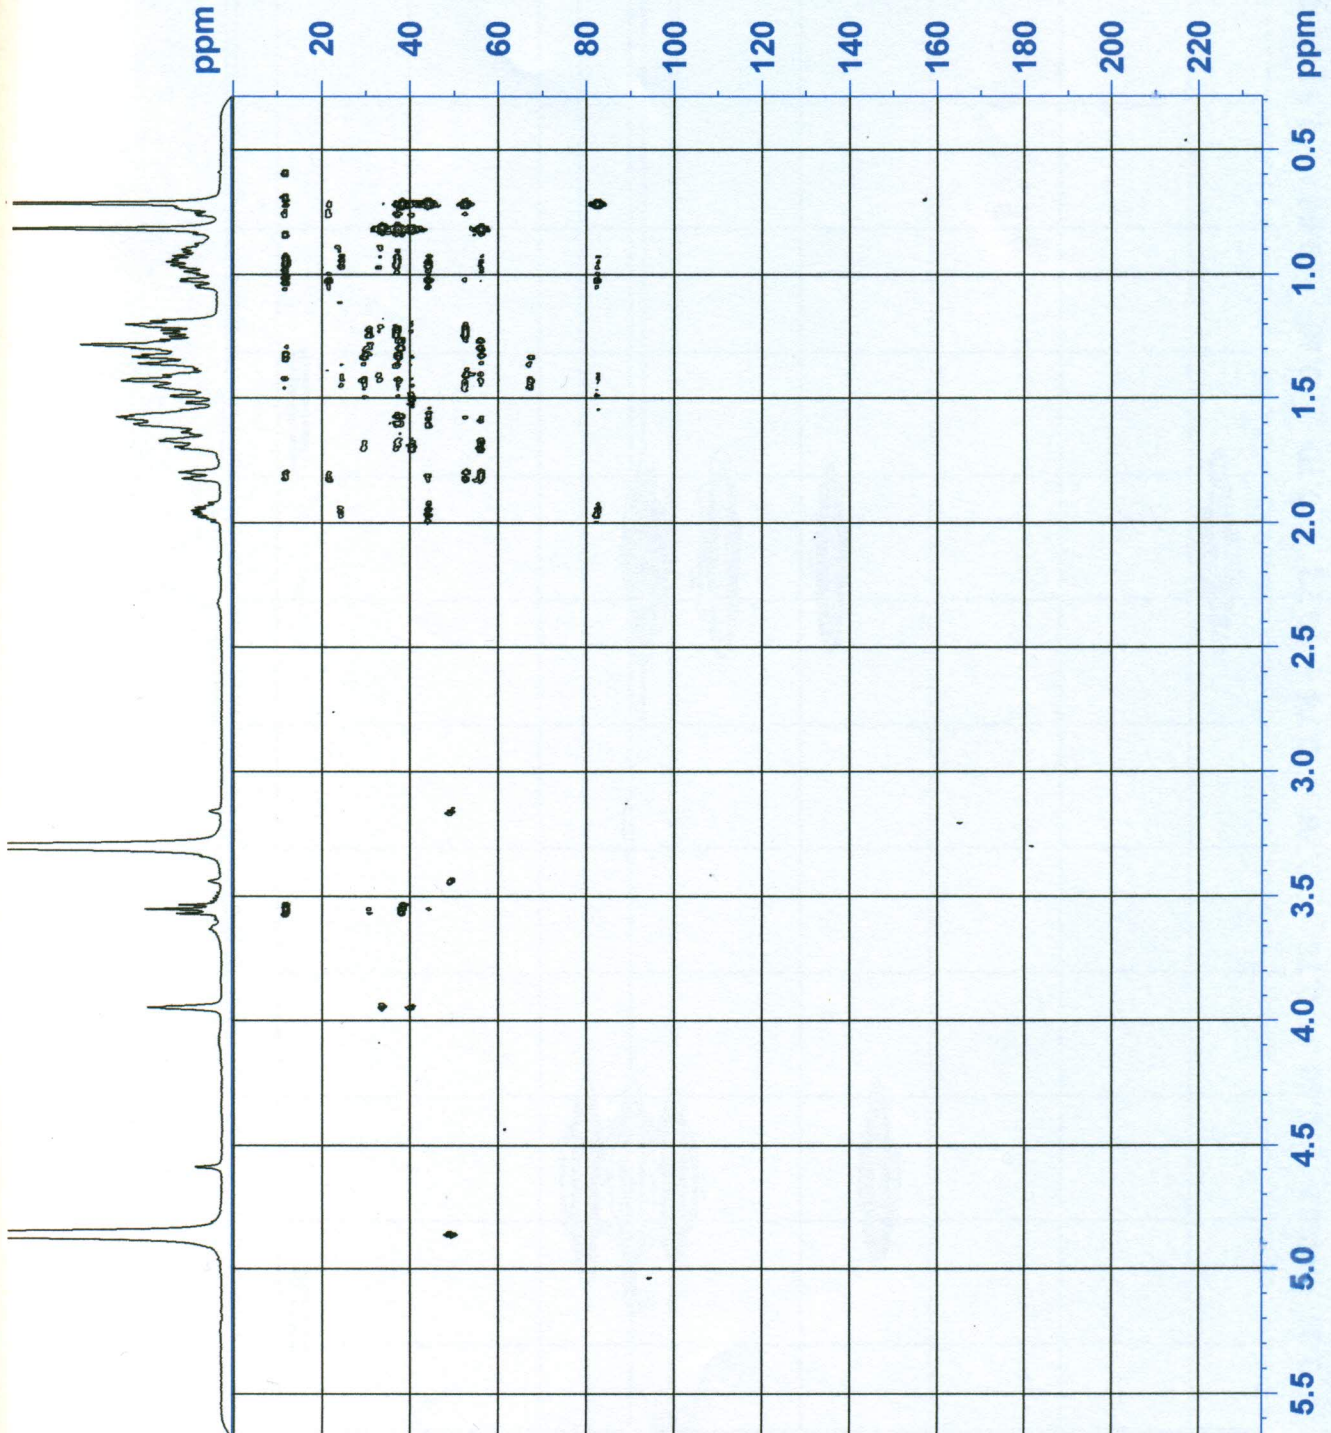

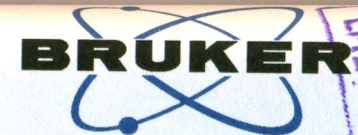

Lab. No. 118

NAME FEB24  
EXPNO 2  
PROCNO 1  
Date\_ 20090224  
Time\_ 11.16  
INSTRUM spect  
PROBHD 5 mm TXI 1H-13  
PULPROG cosygpgf  
TD 2048  
SOLVENT MeOD  
NS 8  
DS 8  
SWH 2693.966 Hz  
FIDRES 1.315413 Hz  
AQ 0.3803444 sec  
RG 812.7  
DW 185.600 usec  
DE 6.50 usec  
TE 297.3 K  
DO 0.00000300 sec  
D1 1.48689198 sec  
D13 0.00000400 sec  
D16 0.00015000 sec  
IN0 0.00037120 sec

===== CHANNEL f1 =====  
NUC1 1H  
P0 7.40 usec  
P1 7.40 usec  
PL1 3.00 dB  
SFO1 500.2315007 MHz

===== GRADIENT CHANNEL =====  
GPNAM1 SINE.100  
GPX1 0.00 %  
GPY1 0.00 %  
GPZ1 10.00 %  
P16 1500.00 usec  
NDO 1  
TD 256  
SFO1 500.2315 MHz  
FIDRES 10.523305 Hz  
SW 5.385 ppm  
FnMODE QF  
SI 1024  
SF 500.2300120 MHz  
WDW QSINE  
SSB 0  
LB 0.00 Hz  
GB 0  
PC 1.00  
SI 1024  
MC2 QF  
SF 500.2300120 MHz  
WDW QSINE  
SSB 0  
LB 0.00 Hz  
GB 0

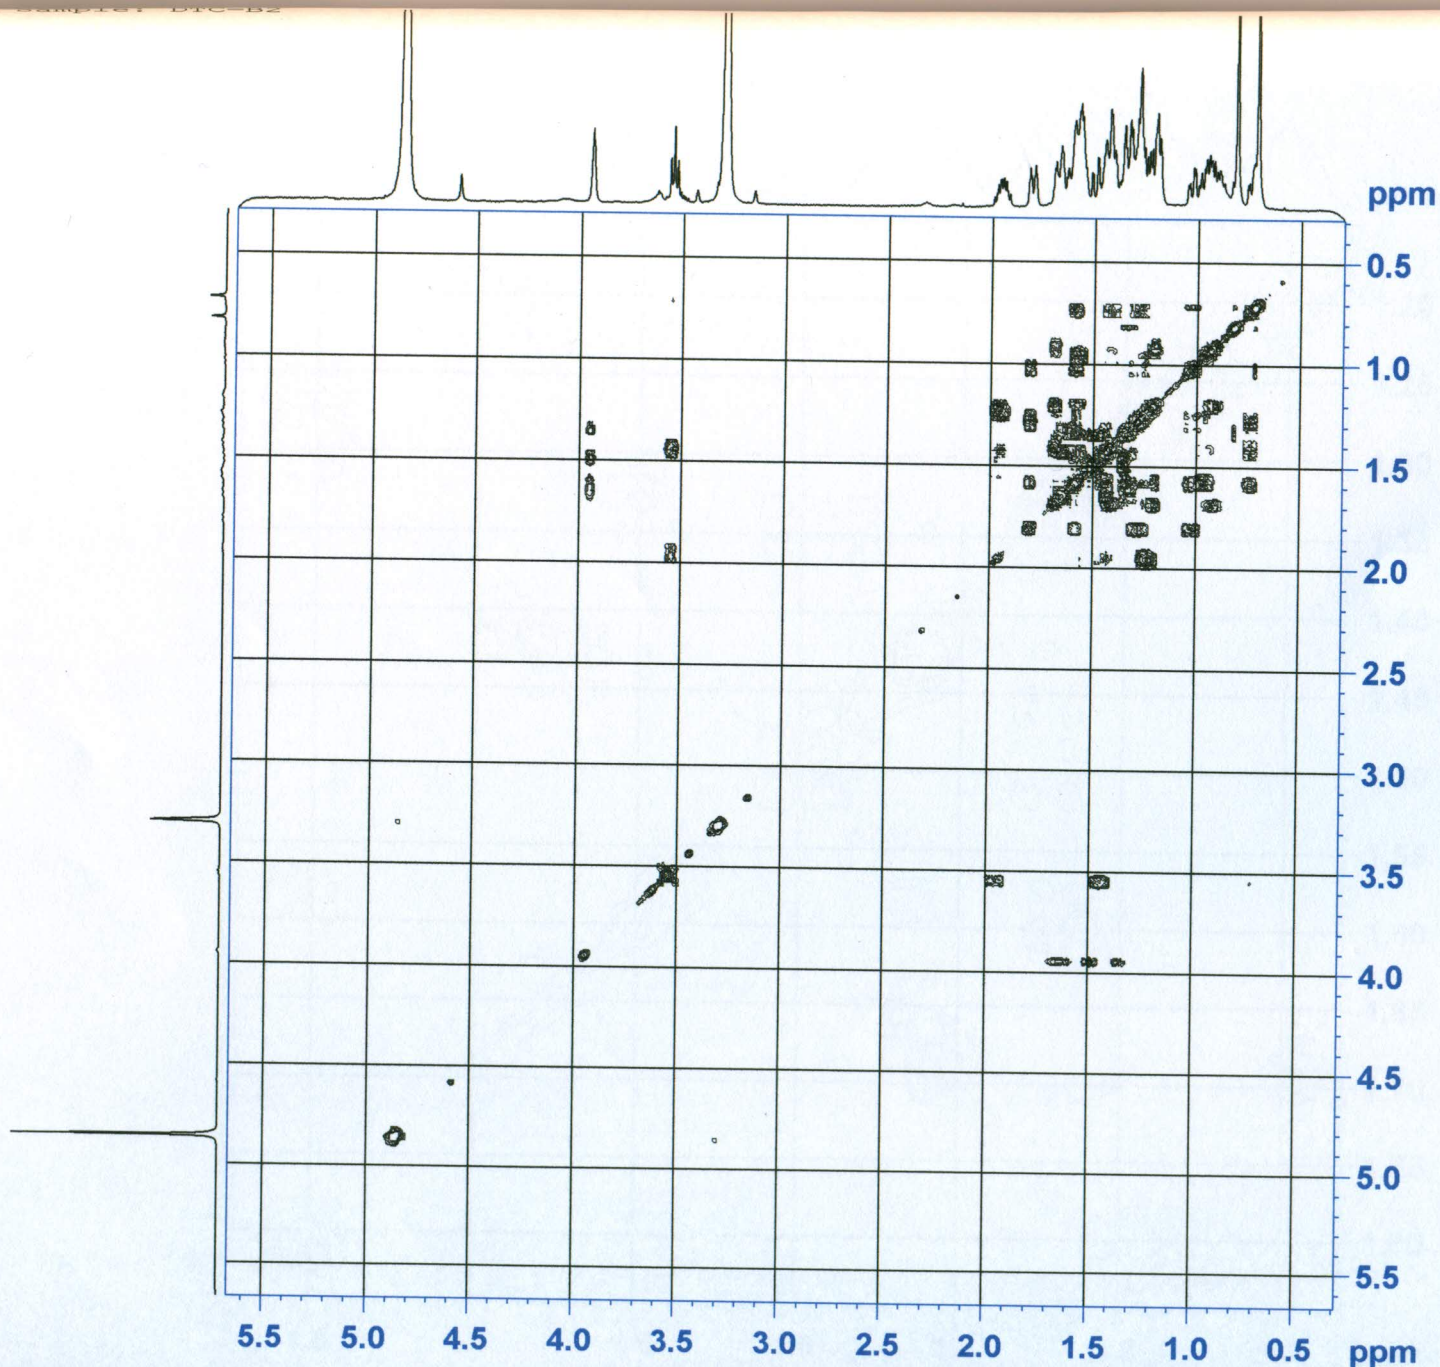

Salman/Prof. Iqbal  
 Sample: DTC=B2

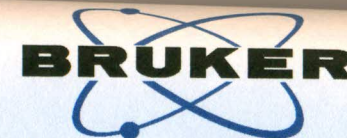

AVANCE 500  
 LAB. No. 118

NAME FEB24  
 EXPNO 3  
 PROCNO 1  
 Date 20090224  
 Time 12.23  
 INSTRUM spect  
 PROBHD 5 mm TXI 1H-13  
 PULPROG noesygpph  
 TD 1024  
 SOLVENT MeOD  
 NS 16  
 DS 8  
 SWH 2693.966 Hz  
 FIDRES 2.630826 Hz  
 AQ 0.1902900 sec  
 RG 574.7  
 DW 185.600 usec  
 DE 6.50 usec  
 TE 297.4 K  
 D0 0.00017618 sec  
 D1 2.00000000 sec  
 D8 0.80000001 sec  
 D16 0.00015000 sec  
 INO 0.00037120 sec

===== CHANNEL f1 =====  
 NUC1 1H  
 P1 7.40 usec  
 P2 14.80 usec  
 PL1 3.00 dB  
 SF01 500.2315007 MHz

===== GRADIENT CHANNEL =====  
 GPNAM1 SINE.100  
 GPNAM2 SINE.100  
 GPX1 0.00 %  
 GPX2 0.00 %  
 GPY1 0.00 %  
 GPY2 0.00 %  
 GPZ1 40.00 %  
 GPZ2 -40.00 %  
 P16 1500.00 usec  
 NDO 1  
 TD 256  
 SF01 500.2315 MHz  
 FIDRES 10.523305 Hz  
 SW 5.385 ppm  
 FhMODE States-TPPI  
 SI 1024  
 SF 500.2300120 MHz  
 WDW QSINE  
 SSB 2  
 LB 0.00 Hz  
 GB 0  
 PC 1.00  
 SI 1024  
 MC2 States-TPPI  
 SF 500.2300120 MHz  
 WDW QSINE  
 SSB 2  
 LB 0.00 Hz  
 GB 0

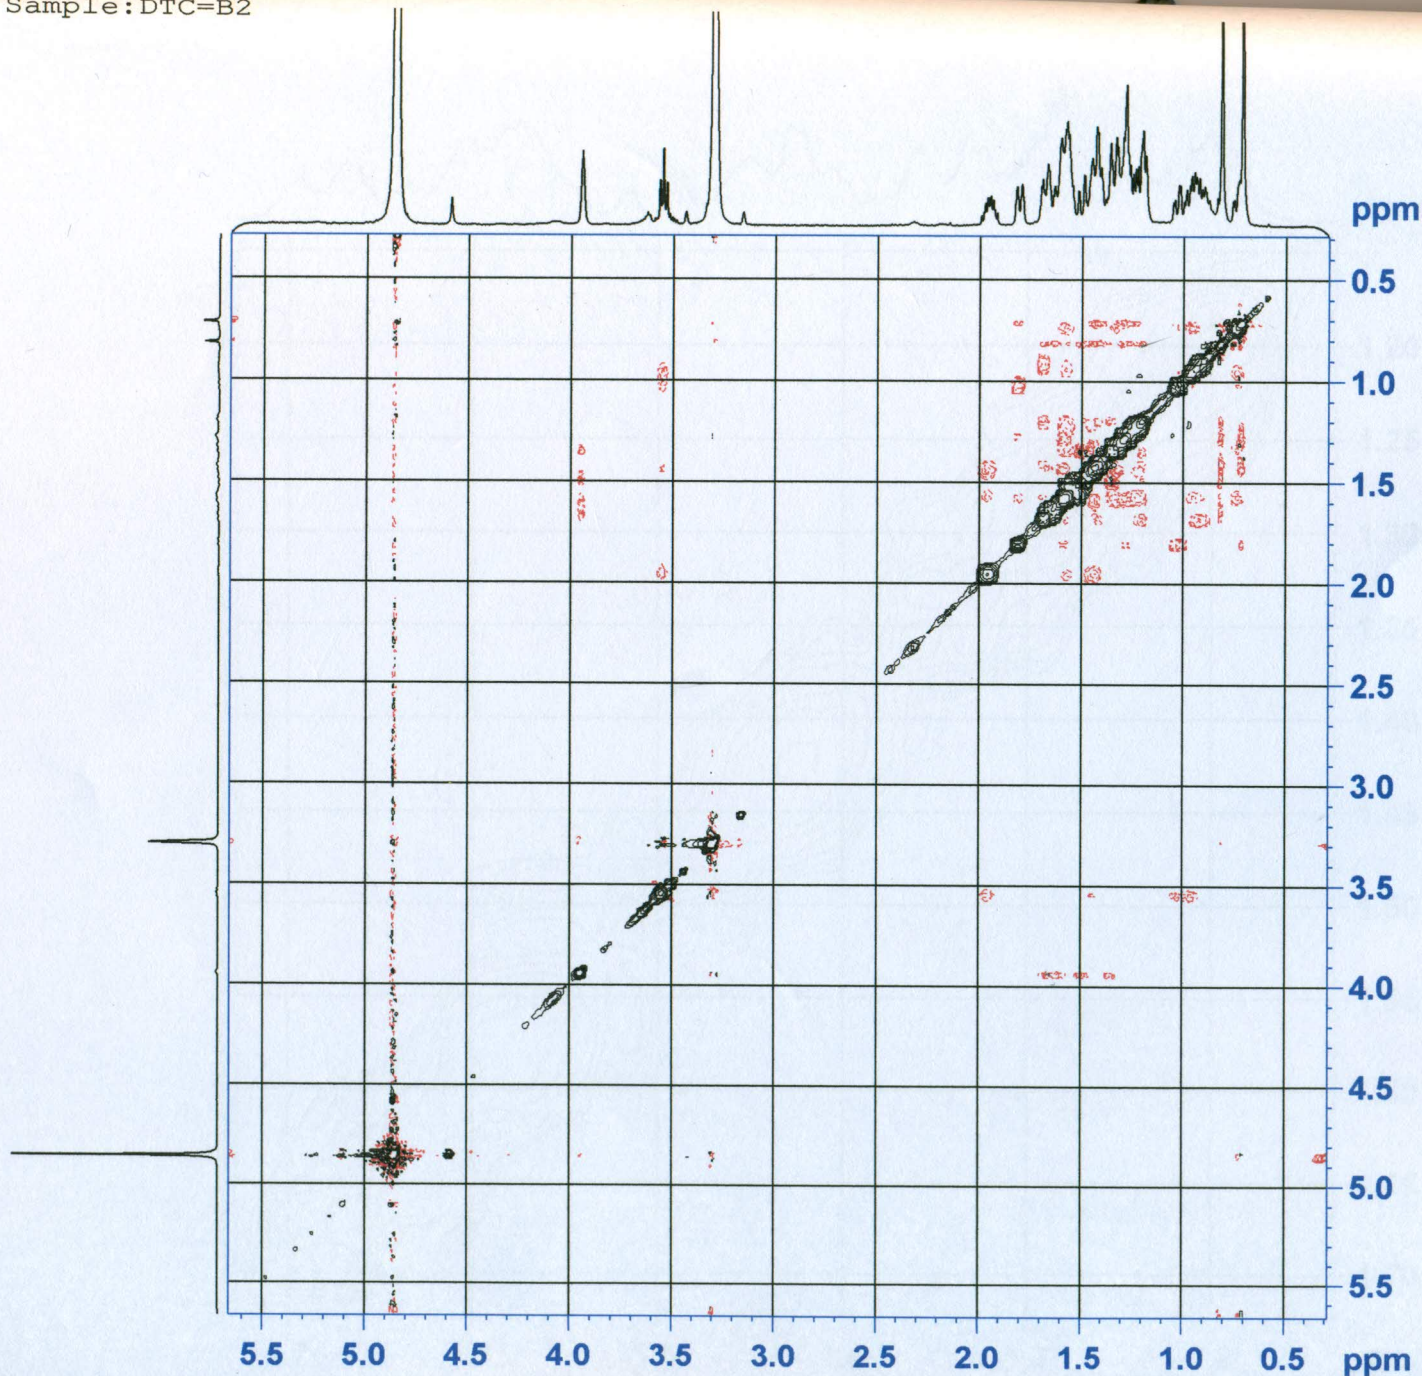

Supplement: 1752-153X-7-164-S2.pdf [file 1752-153X-7-164-S2.pdf]
