# Supplementary material for: Molecular docking simulation studies on potent butyrylcholinesterase inhibitors obtained from microbial transformation of dihydrotestosterone
Source: PubMed Central journal article supplement (PMC4126177; doi:10.1186/1752-153x-7-164), 2013-10-08

Salman/Dr, Iqbal/TGF-F6-1/

AVANCE 400-A  
LAB. No. 109

7.240  
7.038  
7.012  
6.236  
6.211  
6.075

2.500  
2.490  
2.468  
2.442  
2.419  
2.386  
2.125  
2.102  
2.079  
2.054  
2.032  
1.980  
1.965  
1.949  
1.935  
1.880  
1.872  
1.849  
1.819  
1.790  
1.550  
1.241  
1.127  
1.096  
0.928

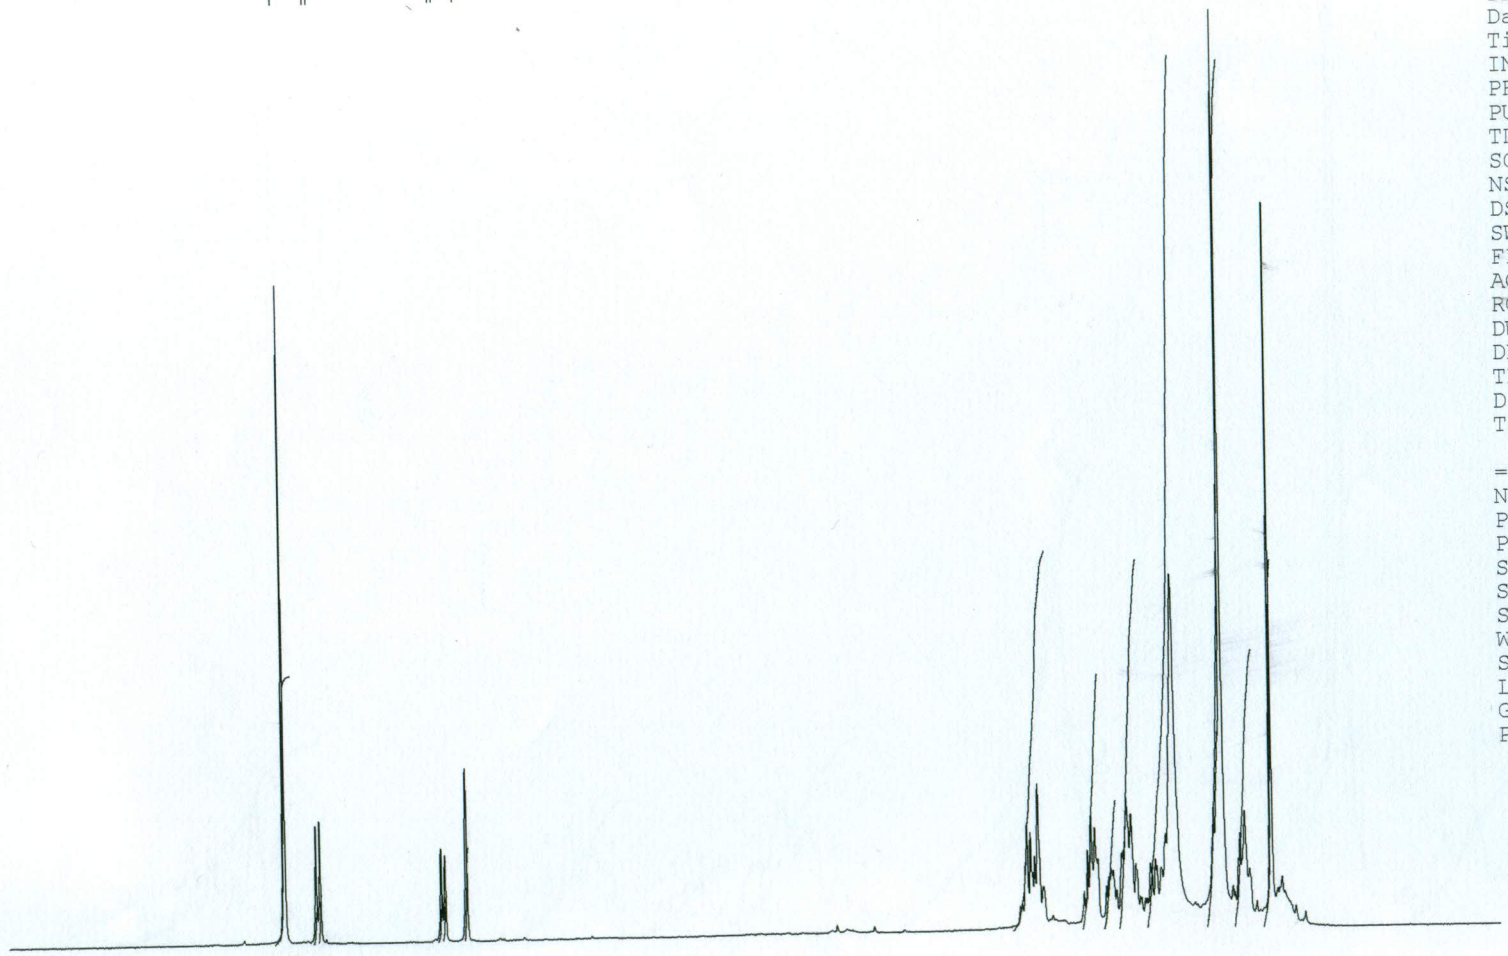

NAME Oct08  
EXPNO 2  
PROCNO 1  
Date\_ 20091008  
Time 10.44  
INSTRUM spect  
PROBHD 5 mm Dual 13C/  
PULPROG zg30  
TD 32768  
SOLVENT CDC13  
NS 128  
DS 0  
SWH 8012.820 Hz  
FIDRES 0.244532 Hz  
AQ 2.0447731 sec  
RG 512  
DW 62.400 usec  
DE 6.50 usec  
TE 300.7 K  
D1 1.00000000 sec  
TD0 1

===== CHANNEL f1 =====  
NUC1 1H  
P1 8.10 usec  
PL1 4.00 dB  
SFO1 400.2328016 MHz  
SI 16384  
SF 400.2300132 MHz  
WDW EM  
SSB 0  
LB 0.30 Hz  
GB 0  
PC 2.00

0.31  
0.05  
0.06  
0.06  
0.06  
0.11

0.44  
0.30  
0.16  
0.43  
1.01  
1.00  
0.32  
0.43

8 7 6 5 4 3 2 1 0 ppm

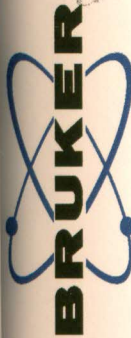

AVANCE AV 500  
LAB. No. 108

Sample: TGFF61

220.09  
186.28  
168.33  
155.34  
127.75  
124.18  
77.25  
77.04  
76.83  
52.25  
50.40  
47.72  
43.44  
35.67  
35.11  
32.56  
32.31  
31.95  
31.18  
29.73  
29.40  
22.73

NAME  
EXPNO 1  
PROCNO 1  
Date\_ 20091026  
Time\_ 22.00  
INSTRUM spect  
PROBHD 5 mm CPTCI 1H-  
PULPROG zgpg  
TD 65536  
SOLVENT CDCl3  
NS 12288  
DS 2  
SWH 35971.223 Hz  
FIDRES 0.548877 Hz  
AQ 0.9110143 sec  
RG 32768  
DE 13.900 usec  
TE 6.50 usec  
TE 294.1 K  
D1 1.50000000 sec  
D11 0.03000000 sec  
TDO 12

==== CHANNEL f1 =====  
NUC1 13C  
P1 16.00 usec  
PL1 2.00 dB  
PL1W 66.40702820 W  
SFO1 150.9453107 MHz

==== CHANNEL f2 =====  
CPDPRG2 waltz16  
NUC2 1H  
PCPD2 65.00 usec  
PL2 3.30 dB  
PL12 22.06 dB  
PL13 27.00 dB  
PL2W 9.16420078 W  
PL12W 0.12192553 W  
PL13W 0.03909260 W  
SFO2 600.2336014 MHz  
SI 32768  
SF 150.9279540 MHz  
WDW EM  
SSB 0  
LB 1.00 Hz  
GB 0  
PC 1.40

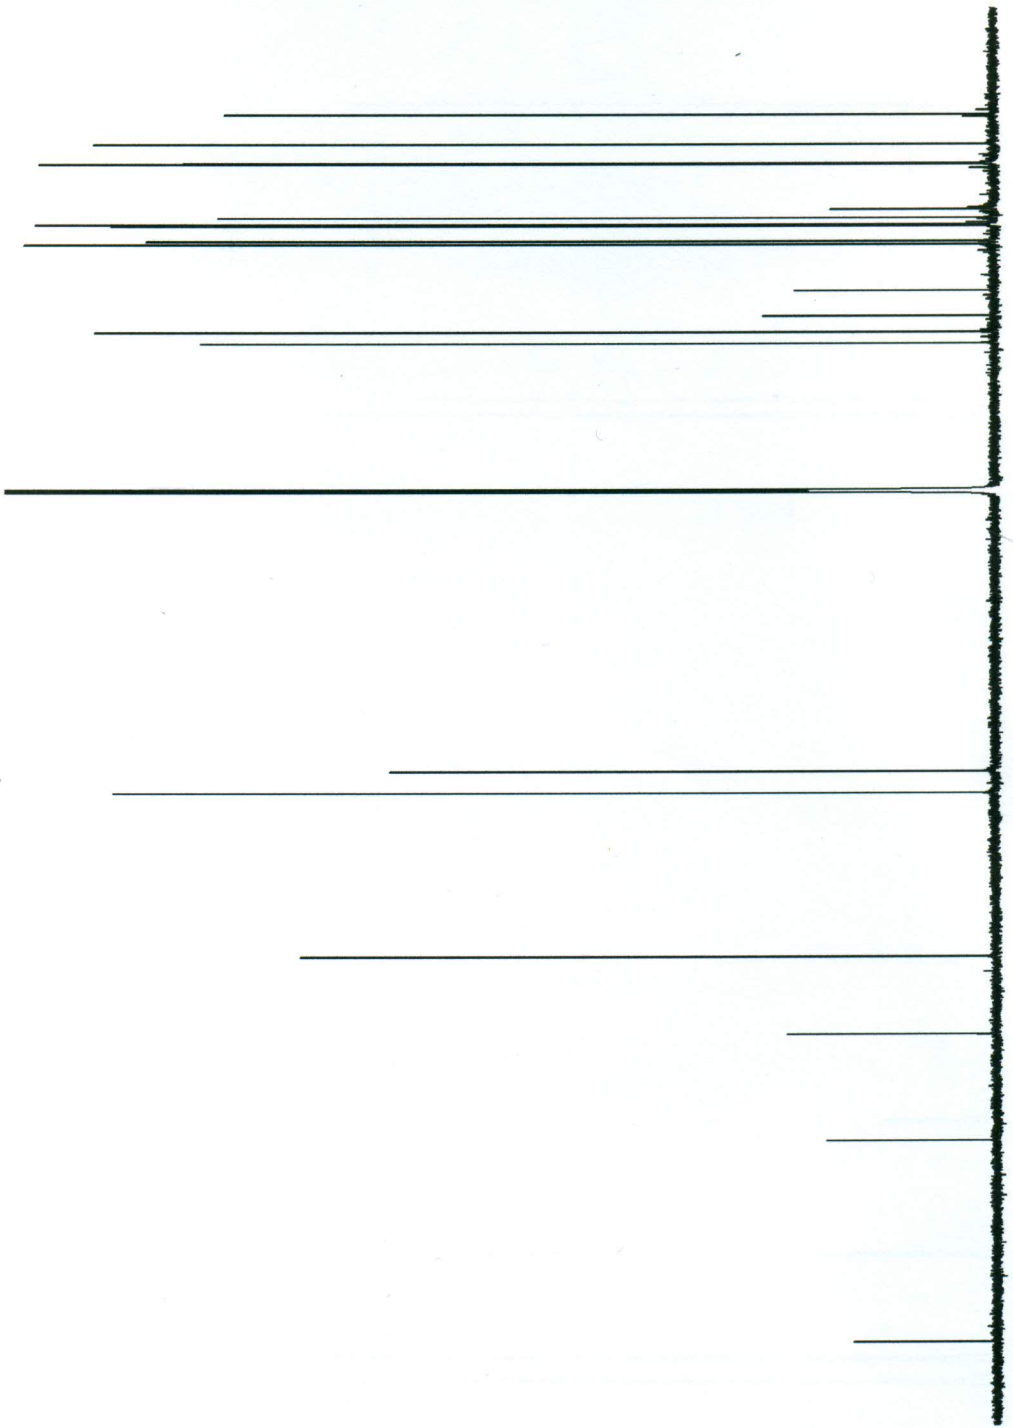

220 200 180 160 140 120 100 80 60 40 20 ppm

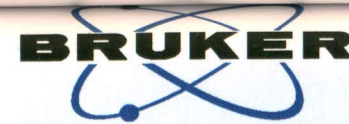

BRUKER  
1000 MHz  
5 mm QNP 1H-  
13C CP  
13C NMR

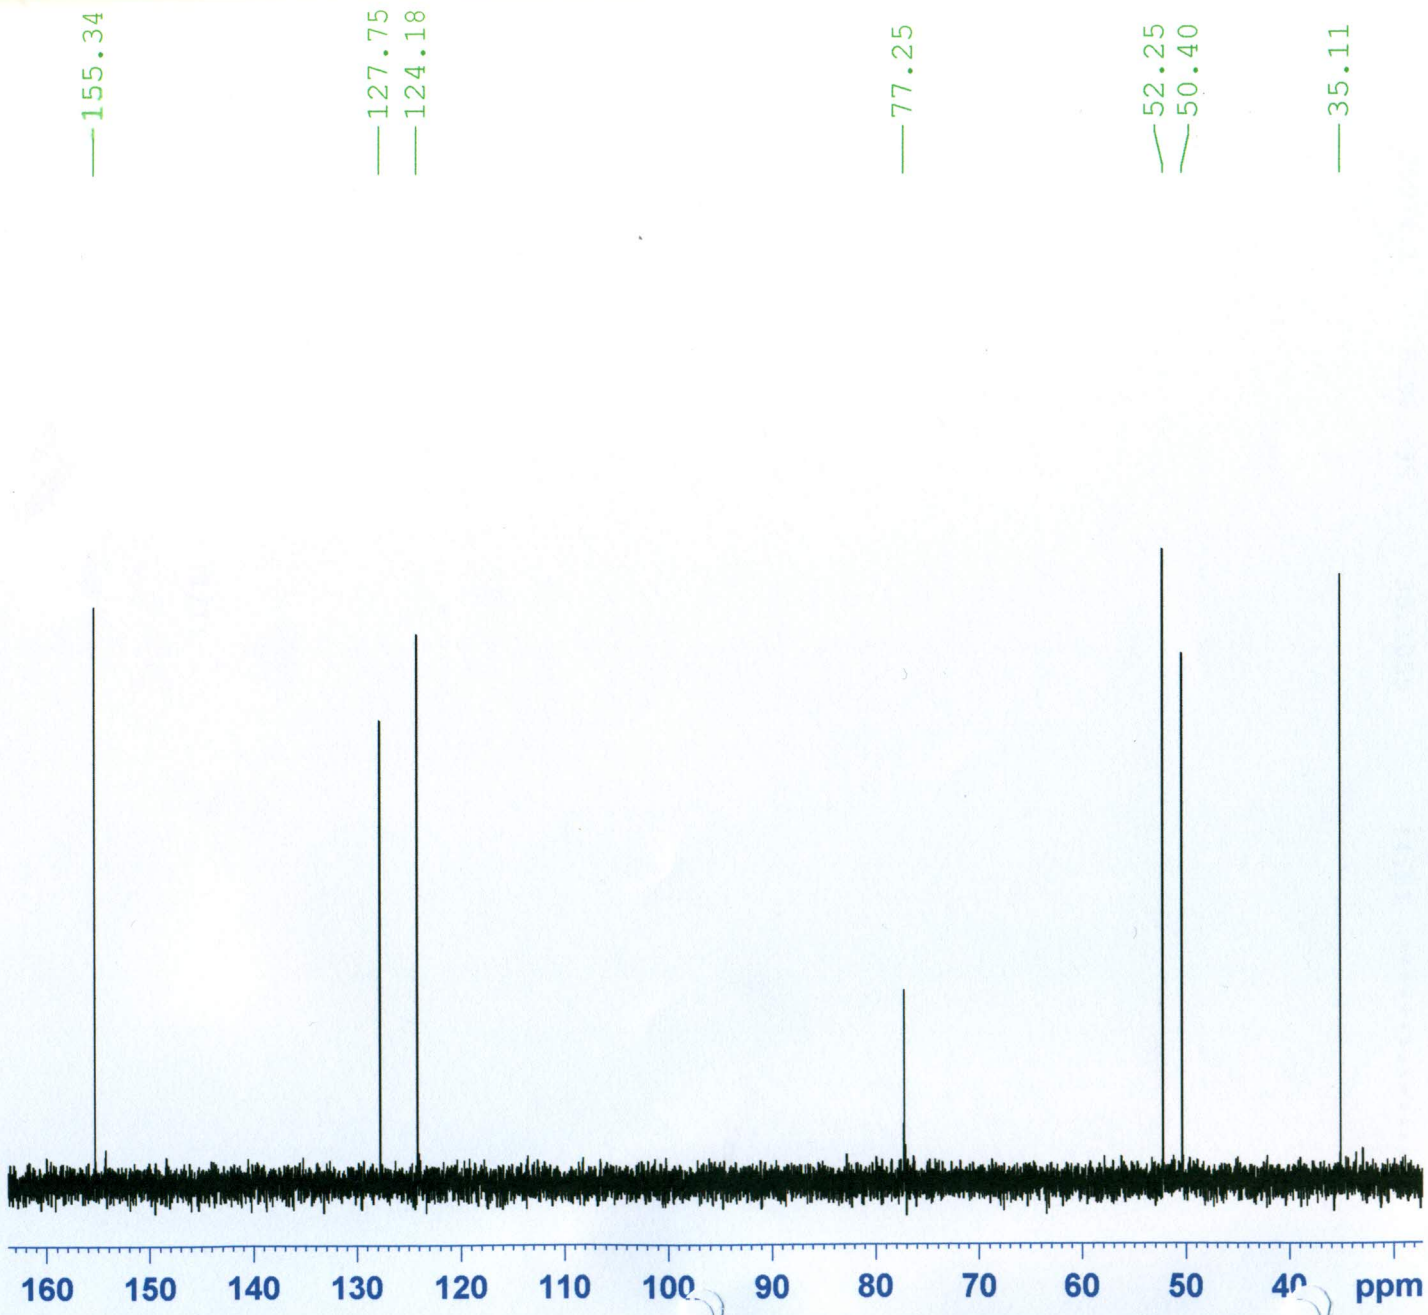

NAME Oct 26  
 EXPNO 8  
 PROCNO 1  
 Date\_ 20091027  
 Time\_ 8.24  
 INSTRUM spect  
 PROBHD 5 mm CPTCI 1H-  
 PULPROG deptsp90  
 TD 65536  
 SOLVENT CDC13  
 NS 334  
 DS 2  
 SWH 30303.031 Hz  
 FIDRES 0.462388 Hz  
 AQ 1.0814105 sec  
 RG 32768  
 DW 16.500 usec  
 DE 6.50 usec  
 TE 293.6 K  
 CNST2 145.000000  
 D1 1.5000000 sec  
 D2 0.00344828 sec  
 D12 0.00002000 sec  
 TD0 6

===== CHANNEL f1 =====  
 NUC1 13C  
 P1 16.00 usec  
 P12 2000.00 usec  
 PL0 120.00 dB  
 PL1 2.00 dB  
 PLOW 0.00000000 W  
 PL1W 66.40702820 W  
 SFO1 150.9430463 MHz  
 SP2 1.99 dB  
 SPNAM2 Crp60comp.4  
 SPOAL2 0.500  
 SPOFFS2 0.00 Hz

===== CHANNEL f2 =====  
 CPDPRG2 waltz16  
 NUC2 1H  
 P3 7.50 usec  
 P4 15.00 usec  
 PCPD2 65.00 usec  
 PL2 3.30 dB  
 PL12 22.06 dB  
 PL2W 9.16420078 W  
 PL12W 0.12192553 W  
 SFO2 600.2324009 MHz  
 SI 32768  
 SF 150.9279540 MHz  
 WDW EM  
 SSB 0  
 LB 1.00 Hz  
 GB 0  
 PC 1.40

Salman/Dr. Iqbal  
Sample: TGFF61

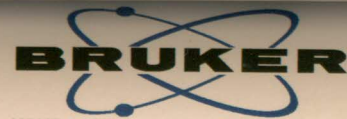

UNIVERSITY OF  
MILWAUKEE  
LIBRARY

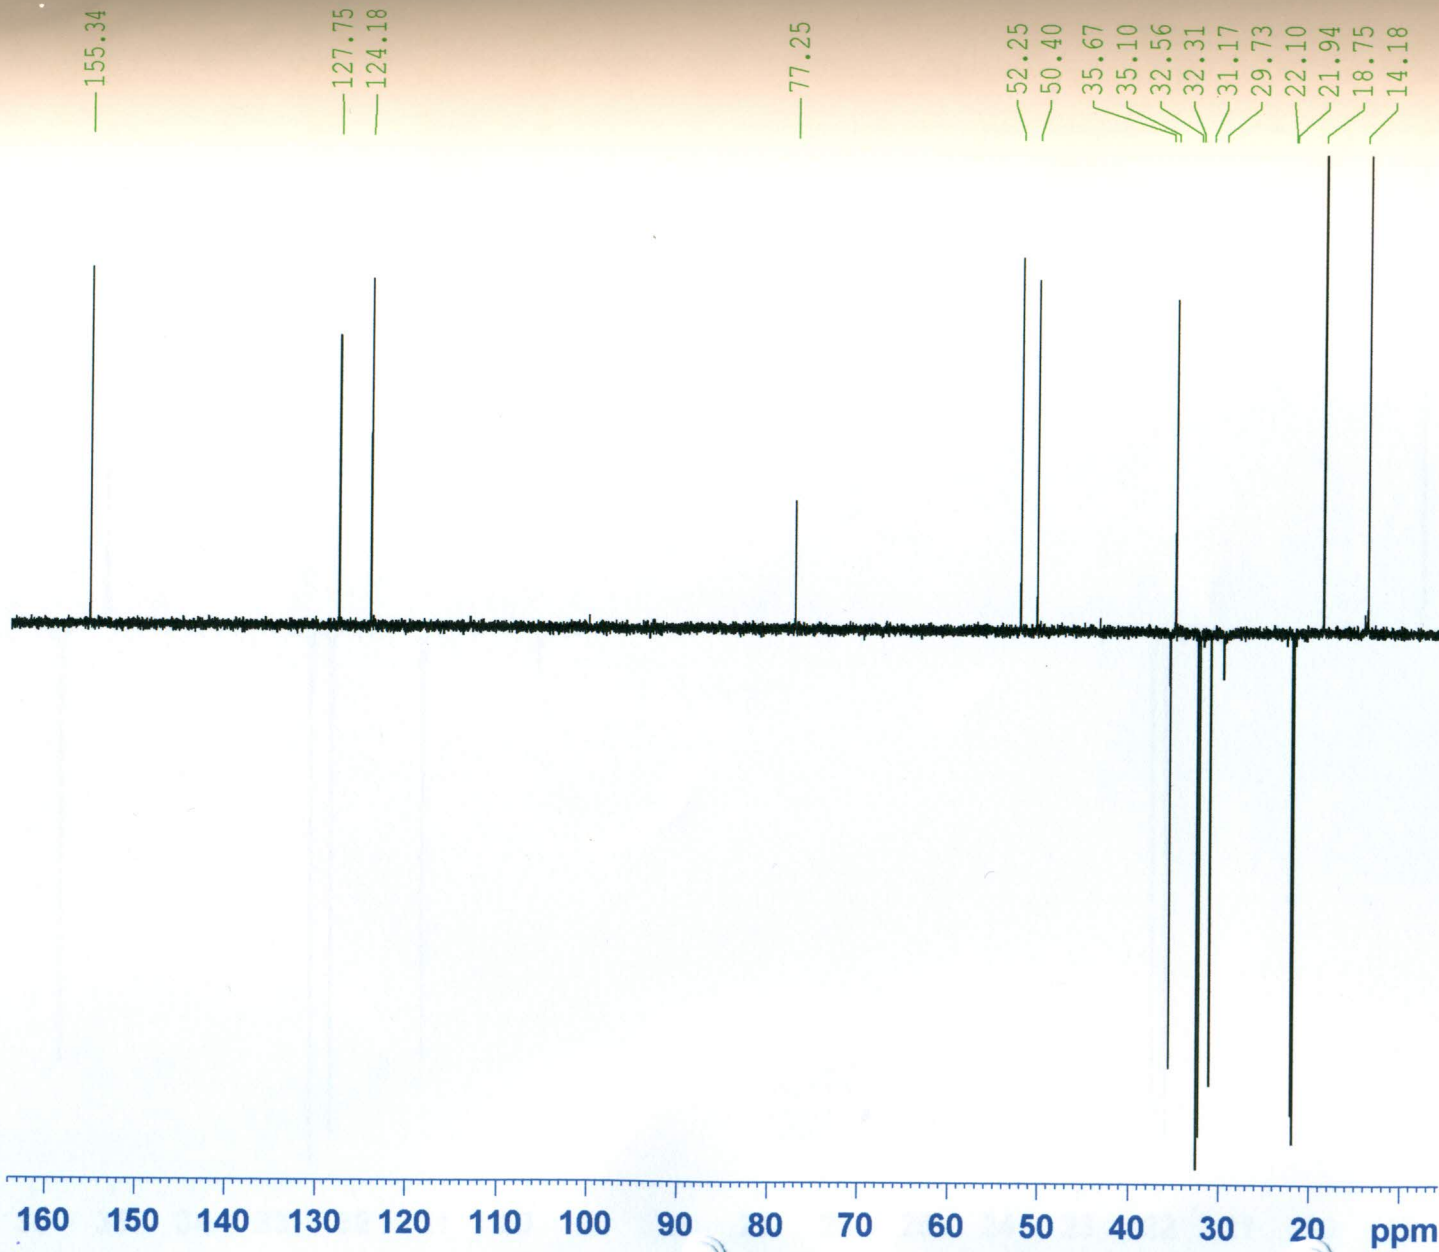

NAME Oct 26  
EXPNO 7  
PROCNO 1  
Date 20091027  
Time 6.30  
INSTRUM spect  
PROBHD 5 mm CPTCI 1H-  
PULPROG deptspi35  
TD 65536  
SOLVENT CDCl3  
NS 3283  
DS 2  
SWH 30303.031 Hz  
FIDRES 0.462388 Hz  
AQ 1.0814105 sec  
RG 32768  
DW 16.500 usec  
DE 6.50 usec  
TE 293.4 K  
CNST2 145.0000000  
D1 1.50000000 sec  
D2 0.00344828 sec  
D12 0.00002000 sec  
TD0 6

===== CHANNEL f1 =====  
NUC1 13C  
P1 16.00 usec  
P12 2000.00 usec  
PL0 120.00 dB  
PL1 2.00 dB  
PLOW 0.00000000 W  
PL1W 66.40702820 W  
SFO1 150.9430463 MHz  
SP2 1.99 dB  
SPNAM2 Crp60comp.4  
SPOAL2 0.500  
SPOFFS2 0.00 Hz

===== CHANNEL f2 =====  
CPDPRG2 waltz16  
NUC2 1H  
P3 7.50 usec  
P4 15.00 usec  
PCPD2 65.00 usec  
PL2 3.30 dB  
PL12 22.06 dB  
PL2W 9.16420078 W  
PL12W 0.12192553 W  
SFO2 600.2324009 MHz  
SI 32768  
SF 150.9279540 MHz  
WDW EM  
SSB 0  
LB 1.00 Hz  
GB 0  
PC 1.40

ADVANCE AV 600  
LAB. No. 108

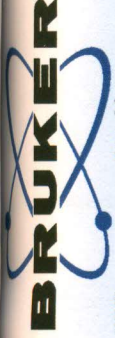

NAME  
EXPNO 5  
PROCNO 1  
Date 20091026  
Time 16.48  
INSTRUM spect  
PROBHD 5 mm CPTCl IH-  
PULPROG hmbegp1pndqf  
TD 4096  
SOLVENT CDC13  
NS 32  
DS 8  
SWH 4807.692 Hz  
FIDRES 1.173753 Hz  
AQ 0.42261380 sec  
RG 46341  
DW 104.000 usec  
DE 6.50 usec  
TE 294.5 K  
CNST2 145.0000000  
CNST13 13.0000000  
D0 0.00000300 sec  
D1 1.50000000 sec  
D2 0.00344828 sec  
D6 0.03846154 sec  
DL6 0.00015000 sec  
LN0 0.00001440 sec

===== CHANNEL f1 =====  
NUC1 1H  
F1 7.40 usec  
F2 14.80 usec  
PL1 3.30 dB  
PL1W 9.16420078 W  
SFO1 600.2325210 MHz  
===== CHANNEL f2 =====  
NUC2 13C  
F3 10.00 usec  
FL2 2.00 dB  
FL2W 66.40702820 W  
SFO2 150.9453107 MHz  
===== GRADIENT CHANNEL =====  
GENAM1 SINE.100  
GENAM2 SINE.100  
GENAM3 SINE.100  
GFZ1 50.00 %  
GFZ2 30.00 %  
GFZ3 40.10 %  
F16 2000.00 usec  
NDO 2  
TD 256  
SFO1 150.9453 MHz  
SW 135.614929 Hz  
FIDRES 230.000 ppm  
FMODE OF  
SI 1024  
SF 600.2300250 MHz  
WDW SINE  
SSB 0  
LB 0.00 Hz  
GB 0  
PC 1.40  
SI 1024  
MC2 QF  
SF 150.9279540 MHz  
WDW SINE  
SSB 0  
LB 0.00 Hz  
GB 0

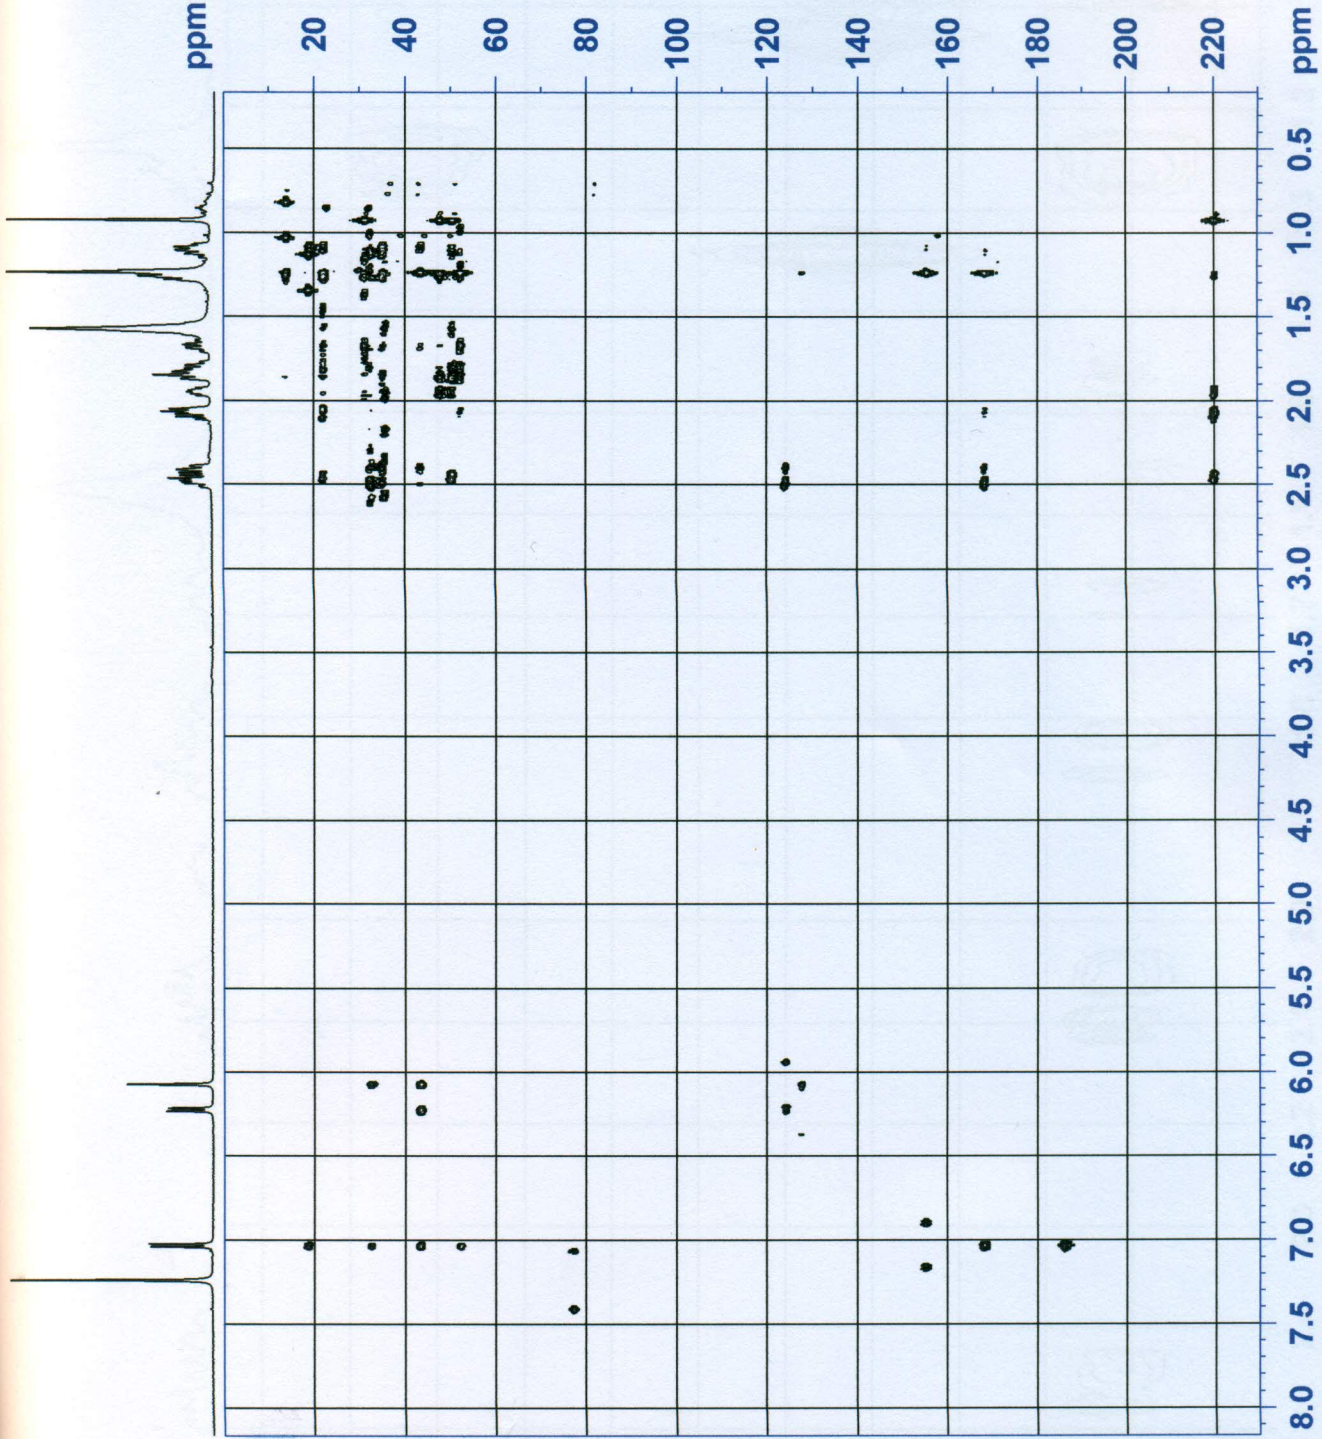

SAMPLE, TCFPC1

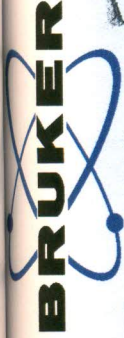

AVANCE AV 600  
LAB. No. 108

```

NAME                               Oct 26
EXNO                                4
PROCNO                              1
Date_                               20091026
Time_                               13.05
INSTRUM spect
PROBHD 5 mm CPTCI LH-
PULPROG hsqcetps1
TD 1024
SOLVENT CDCl3
NS 32
DS 8
SWH 4807.692 Hz
FIDRES 4.695012 Hz
AQ 0.1066500 sec
RG 46341
DW 104.000 usec
DE 6.50 usec
TE 294.5 K
CNST2 145.0000000
D0 0.00000300 sec
D1 1.50000000 sec
D4 0.00172414 sec
D11 0.03000000 sec
D13 0.00000400 sec
D16 0.00015000 sec
D24 0.00110000 sec
INO 0.00001745 sec
ZGPTNS

===== CHANNEL f1 =====
NIC1 1H
P1 7.40 usec
P2 14.80 usec
P28 0.50 usec
PL1 3.30 dB
PL1W 9.16420078 W
SFO1 600.2325210 MHz

===== CHANNEL f2 =====
CPDPRG2 gart
NIC2 13C
P3 10.00 usec
P4 20.00 usec
PCPD2 60.00 usec
PL2 2.00 dB
PL12 17.56 dB
PL2W 66.40702820 W
PL12W 1.84592509 W
SFO2 150.9422922 MHz

===== GRADIENT CHANNEL =====
GENM1 SINE.100
GENM2 SINE.100
GEZ1 80.00 A
GEZ2 20.10 A
PL6 2000.00 usec
ND0 2
TD 256
SFO1 150.9423 MHz
FIDRES 112.027481 Hz
SW 190.000 ppm
FMODE Echo-Antiecho
SI 1024
SF 600.2300250 MHz
WDW QSI
SSB 2
LB 0.00 Hz
GB 0
PC 4.00
SI 1024
MC2 echo-antiecho
SF 150.9279540 MHz
WDW QSI
SSB 2
LB 0.00 Hz
GB 0
  
```

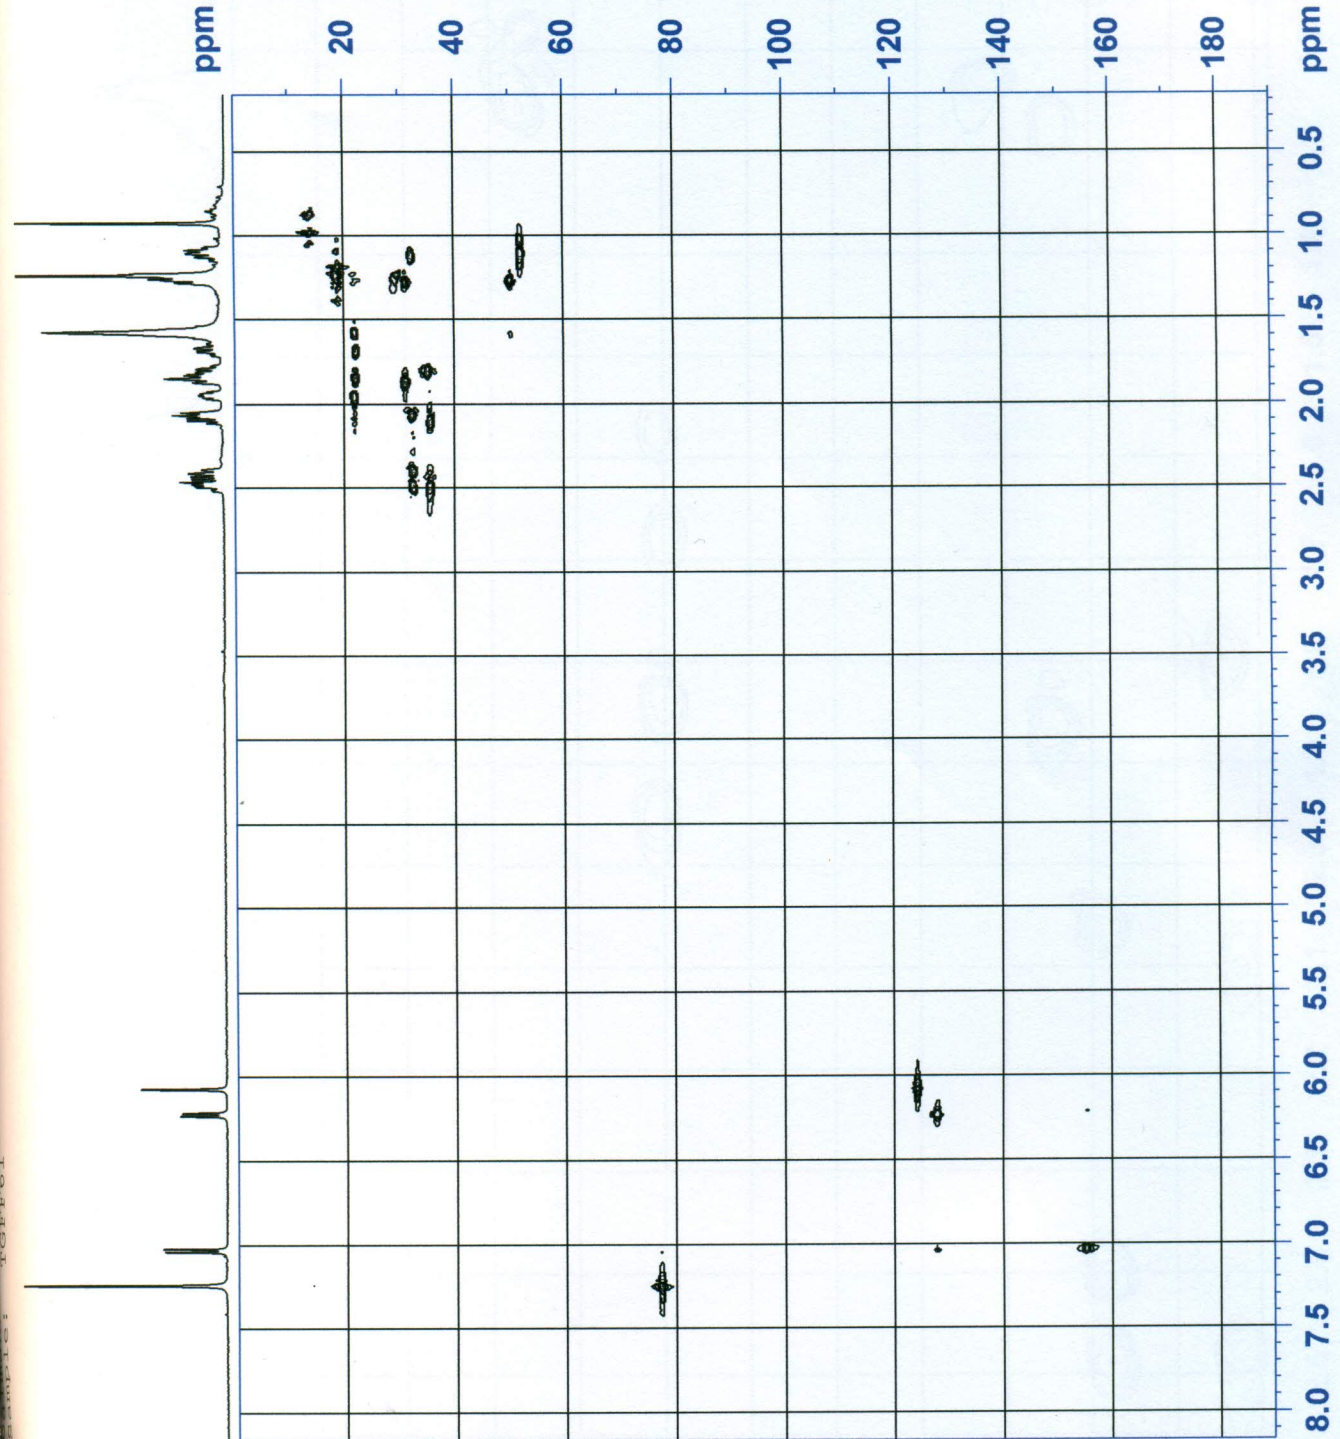

Example 100001

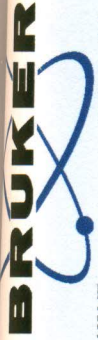

BRIDGE AV 600  
LAB. No. 108

NAME Oct 26  
 EXPNO 2  
 PROCNO 1  
 Date\_ 20091026  
 Time\_ 9.18  
 INSTRUM spect  
 PROBHD 5 mm CPTCI 1H-  
 PULPROG cosydfqf  
 TD 2048  
 SOLVENT CDCl3  
 NS 8  
 DS 4  
 SWH 4807.692 Hz  
 FIDRES 2.347506 Hz  
 AQ 0.2131460 sec  
 RG 35.9  
 DW 104.000 usec  
 DE 6.50 usec  
 TE 294.3 K  
 D0 0.0000300 sec  
 D1 1.5000000 sec  
 D13 0.0000400 sec  
 D20 0.0000200 sec  
 IN0 0.0002080 sec

==== CHANNEL f1 =====  
 NUC1 1H  
 P1 7.40 usec  
 PL1 3.30 dB  
 PL1W 9.16420078 W  
 SFO1 600.2325210 MHz  
 ND0 1  
 TD 256  
 SFO1 600.2325 MHz  
 FIDRES 18.780046 Hz  
 SW 8.010 ppm  
 FhMODE QF  
 SI 1024  
 SF 600.2300250 MHz  
 WDW QSINE  
 SSB 0  
 LB 0.00 Hz  
 GB 0  
 FC 1.40  
 SI 1024  
 MC2 QF  
 SF 600.2300250 MHz  
 WDW QSINE  
 SSB 0  
 LB 0.00 Hz  
 GB 0

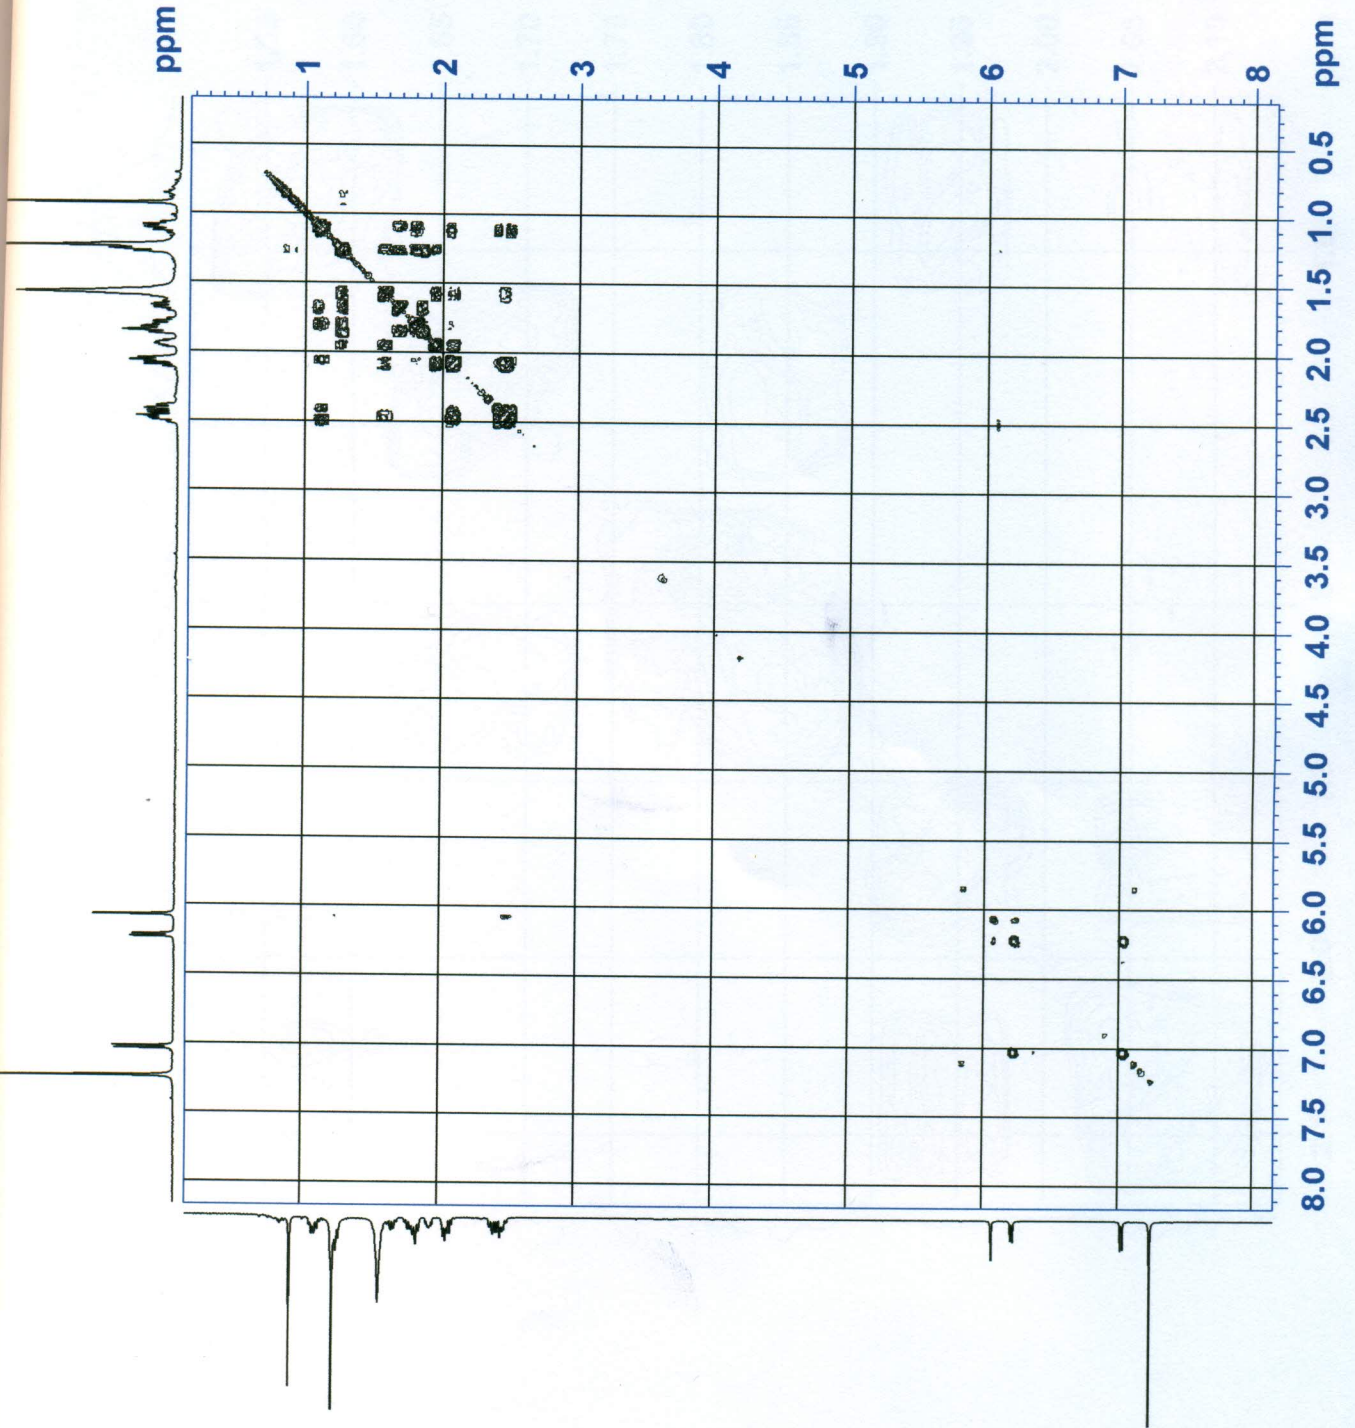

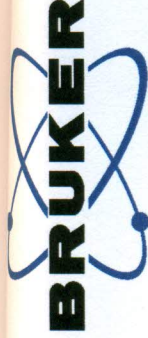

AVANCE AV 600  
LAB. No. 108

Sample: TGFF61

NAME Oct 26  
EXPNO 3  
PROCNO 1  
Date 20091026  
Time 10.18  
INSTRUM spect  
PROBHD 5 mm CPTCI 1H-  
PULPROG noesypph  
TD 1024  
SOLVENT CDCl3  
NS 16  
DS 4  
SWH 4807.692 Hz  
FIDRES 4.695012 Hz  
AQ 0.1066500 sec  
RG 57  
DW 104.000 usec  
DE 6.50 usec  
TE 294.6 K  
D0 0.00009458 sec  
D1 1.50000000 sec  
D8 0.80000001 sec  
D16 0.00015000 sec  
INO 0.00020800 sec

==== CHANNEL f1 =====  
NUC1 1H  
P1 7.40 usec  
P2 14.80 usec  
PL1 3.30 dB  
PL1W 9.16420078 W  
SF01 600.2325210 MHz

==== GRADIENT CHANNEL =====  
GPNAM1 SINE,100  
GPNAM2 SINE,100  
GPZ1 40.00 %  
GPZ2 -40.00 %  
P16 2000.00 usec  
ND0 1  
TD 256  
SF01 600.2325 MHz  
FIDRES 18.780046 Hz  
SW 8.010 ppm  
FnMODE States-TPPI  
SI 1024  
SF 600.2300250 MHz  
WDW QSSINE  
SSB 2  
LB 0.00 Hz  
GB 0  
PC 1.40  
SI 1024  
MC2 States-TPPI  
SF 600.2300250 MHz  
WDW QSSINE  
SSB 2  
LB 0.00 Hz  
GB 0

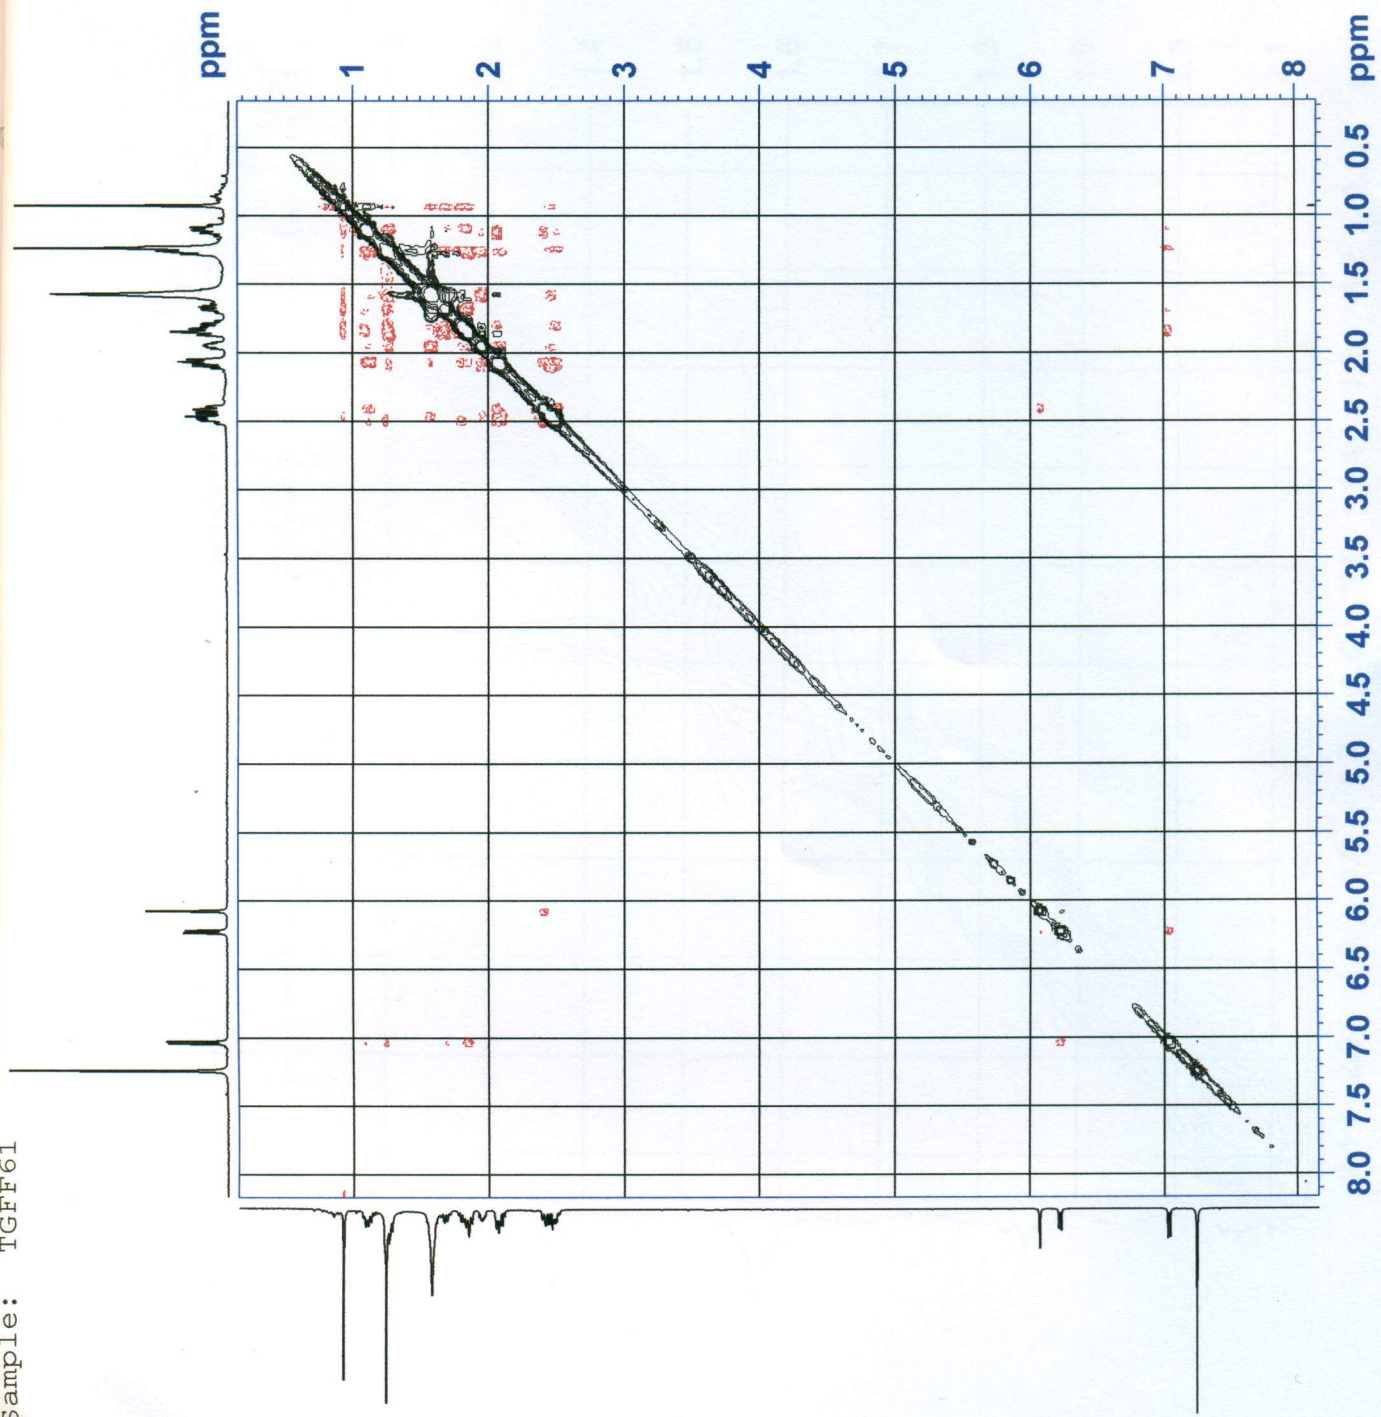

Supplement: 1752-153X-7-164-S4.pdf [file 1752-153X-7-164-S4.pdf]
