# Supplementary material for: Molecular docking simulation studies on potent butyrylcholinesterase inhibitors obtained from microbial transformation of dihydrotestosterone
Source: PubMed Central journal article supplement (PMC4126177; doi:10.1186/1752-153x-7-164), 2013-10-08

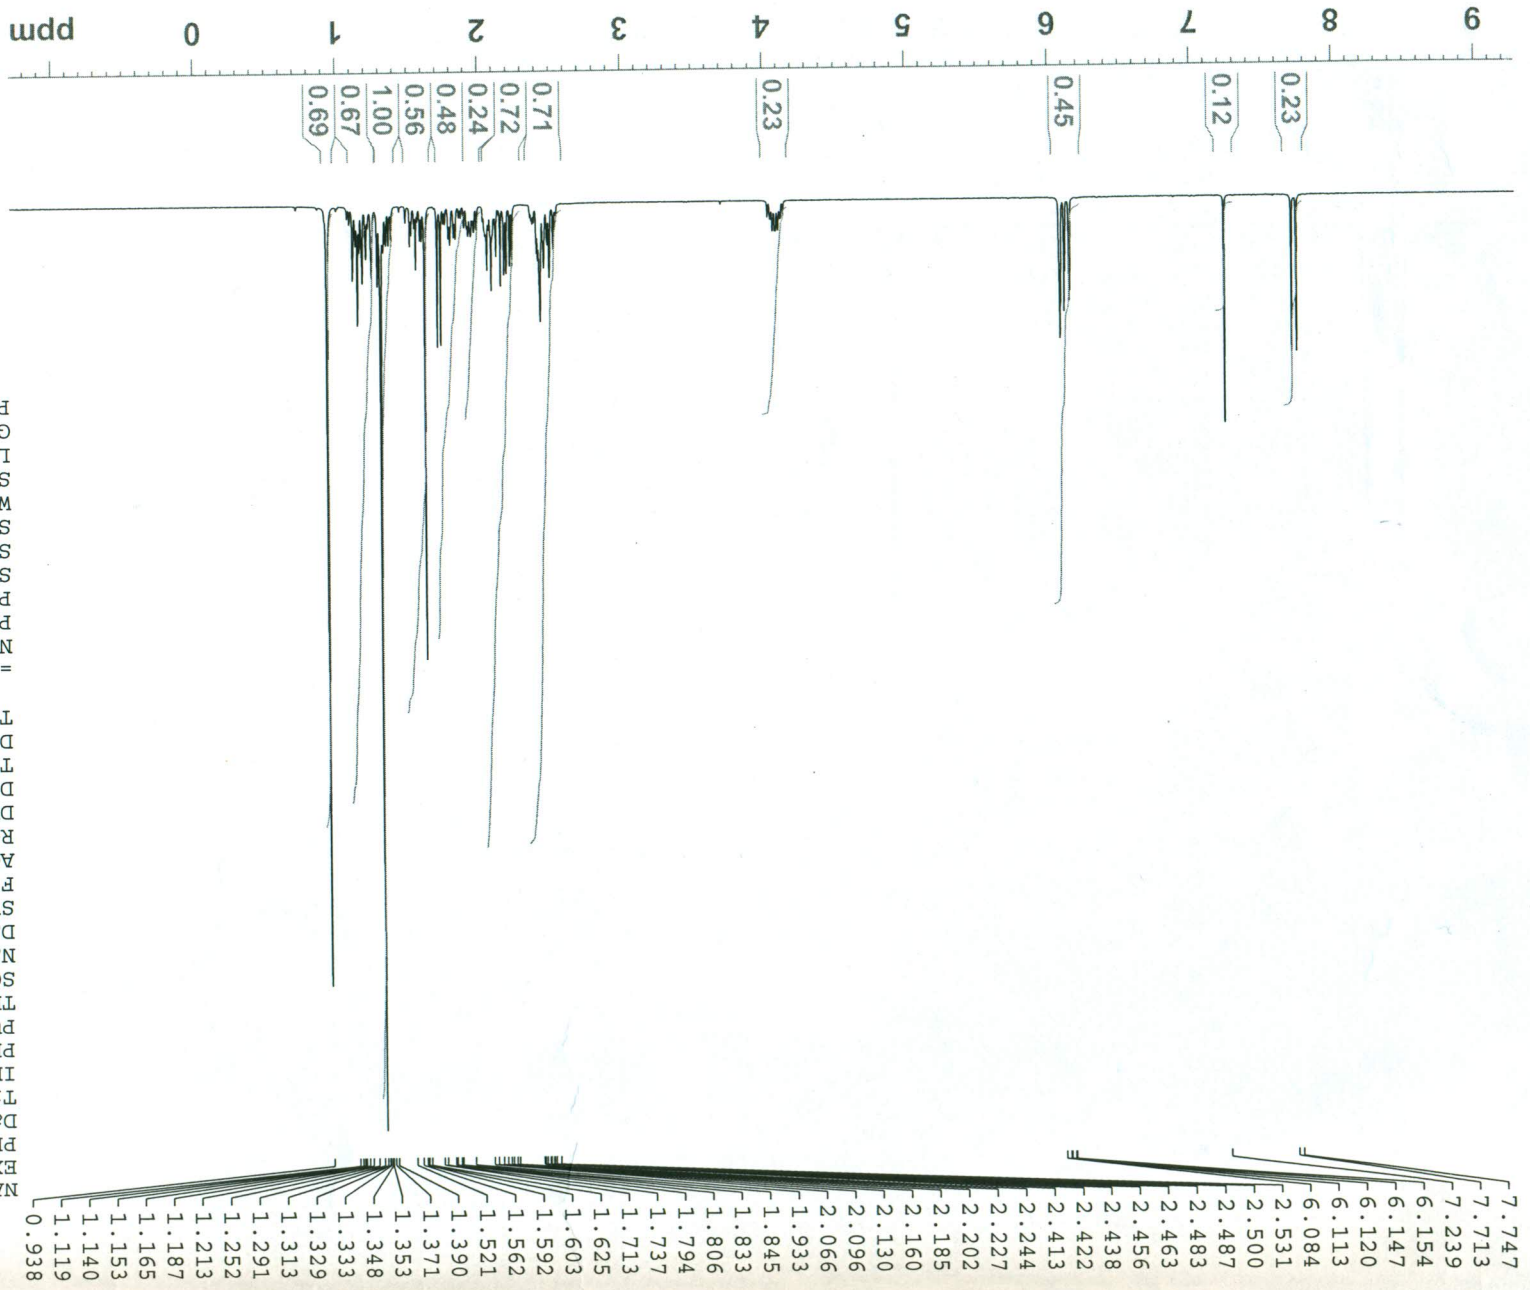

NAME Aug18  
 EXPNO 2  
 PROCNO 1  
 Date 20090818  
 Time 12.56  
 INSTRUM spect  
 PROBHD 5 mm DUL 13C-1  
 PULPROG zg30  
 TD 32768  
 SOLVENT CDCl3  
 NS 128  
 DS 0  
 SMH 6172.839 Hz  
 FIDRES 0.188380 Hz  
 AQ 2.6542580 sec  
 RG 645.1  
 DM 81.000 usec  
 DE 6.50 usec  
 TE 300.0 K  
 DI 1.0000000 sec  
 TD0 1  
 ===== CHANNEL f1 =====  
 NUCL1 1H  
 P1 10.00 usec  
 PL1 -3.00 dB  
 SF01 300.1321009 MHz  
 SI 16384  
 SF 300.1300122 MHz  
 WDM EM  
 SSB 0  
 LB 0.30 Hz  
 GB 0  
 PC 1.00

AVANCE AV 300  
 LAB No. 175

Sample: 1GF2

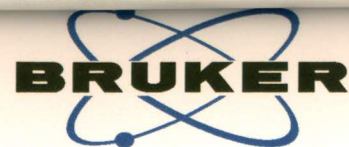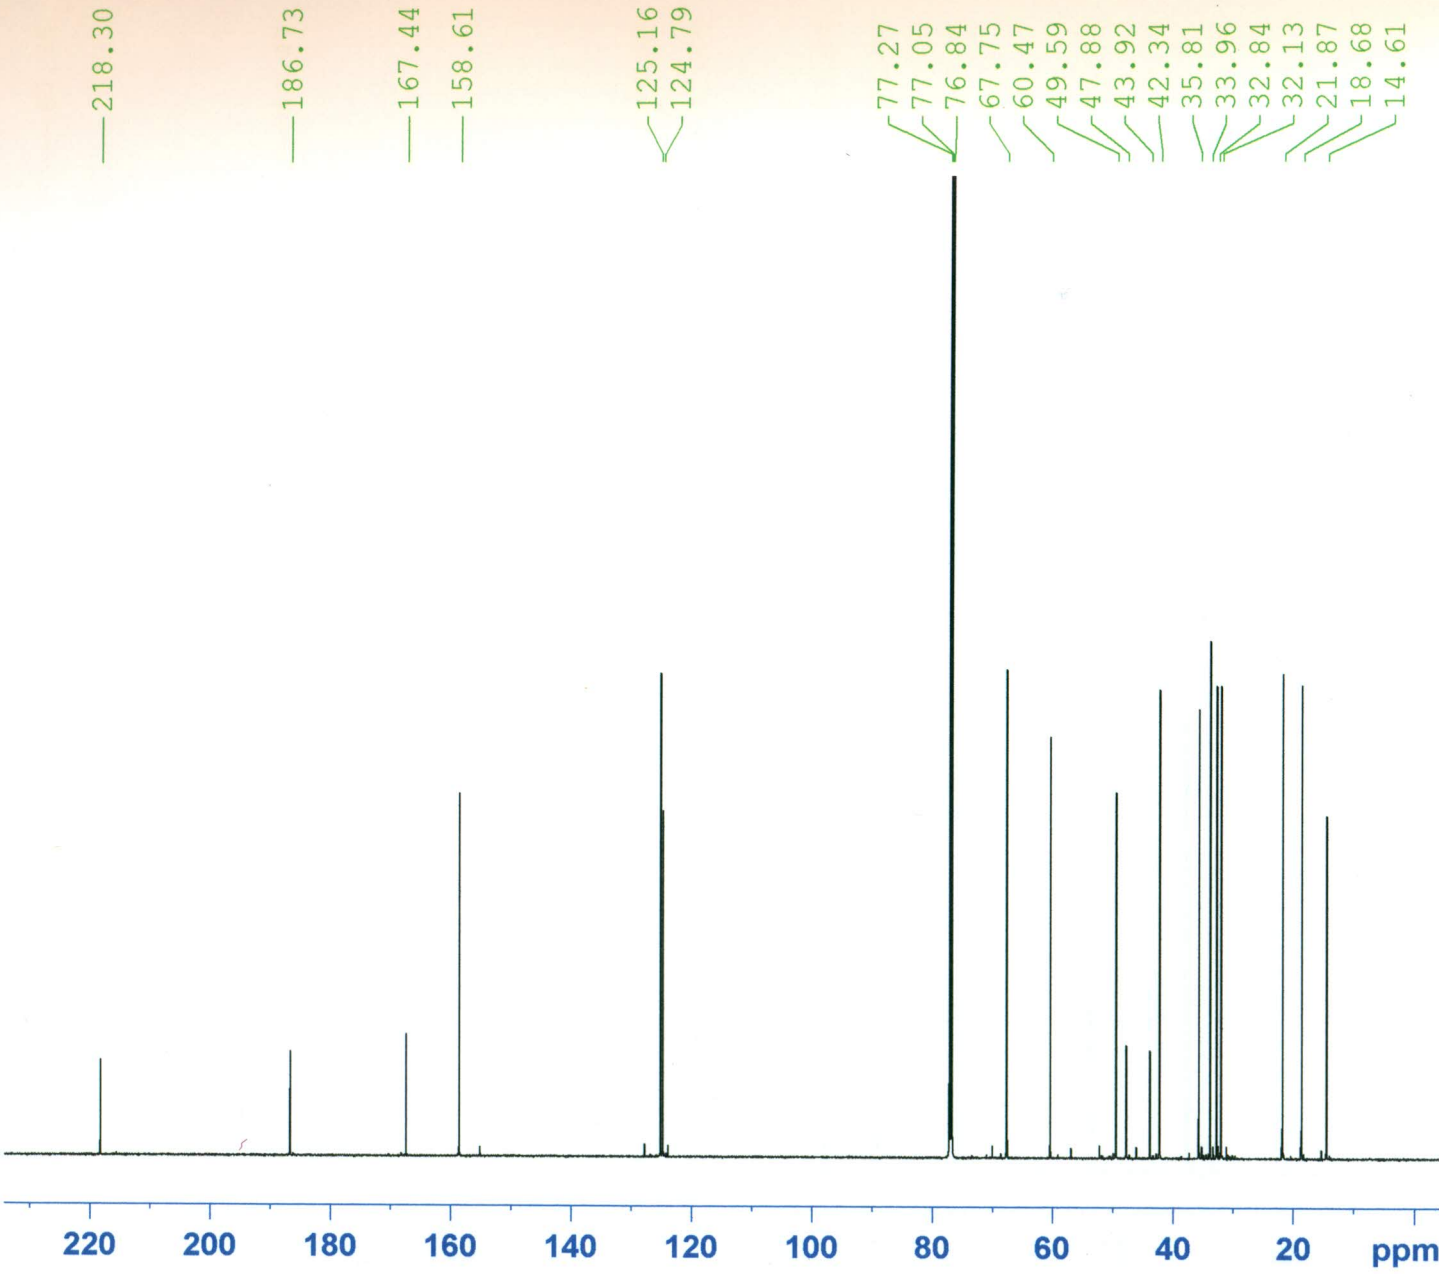

NAME Oct 25  
 EXPNO 6  
 PROCNO 1  
 Date\_ 20091026  
 Time 4.55  
 INSTRUM spect  
 PROBHD 5 mm CPTCI 1H-  
 PULPROG zgpg  
 TD 65536  
 SOLVENT CDCl3  
 NS 6168  
 DS 2  
 SWH 35971.223 Hz  
 FIDRES 0.548877 Hz  
 AQ 0.9110143 sec  
 RG 32768  
 DW 13.900 usec  
 DE 6.50 usec  
 TE 293.7 K  
 D1 1.50000000 sec  
 D11 0.03000000 sec  
 TDO 12

==== CHANNEL f1 =====  
 NUC1 13C  
 P1 16.00 usec  
 PL1 2.00 dB  
 PL1W 66.40702820 W  
 SFO1 150.9453107 MHz

==== CHANNEL f2 =====  
 CPDPRG2 waltz16  
 NUC2 1H  
 PCPD2 65.00 usec  
 PL2 3.30 dB  
 PL12 22.06 dB  
 PL13 27.00 dB  
 PL2W 9.16420078 W  
 PL12W 0.12192553 W  
 PL13W 0.03909260 W  
 SFO2 600.2336014 MHz  
 SI 32768  
 SF 150.9279540 MHz  
 WDW EM  
 SSB 0  
 LB 1.00 Hz  
 GB 0  
 PC 1.40

VANCE AV 500  
 LAB. No. 108

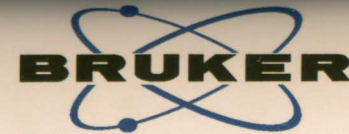

RECEIVED  
OCT 25 1983  
NMR

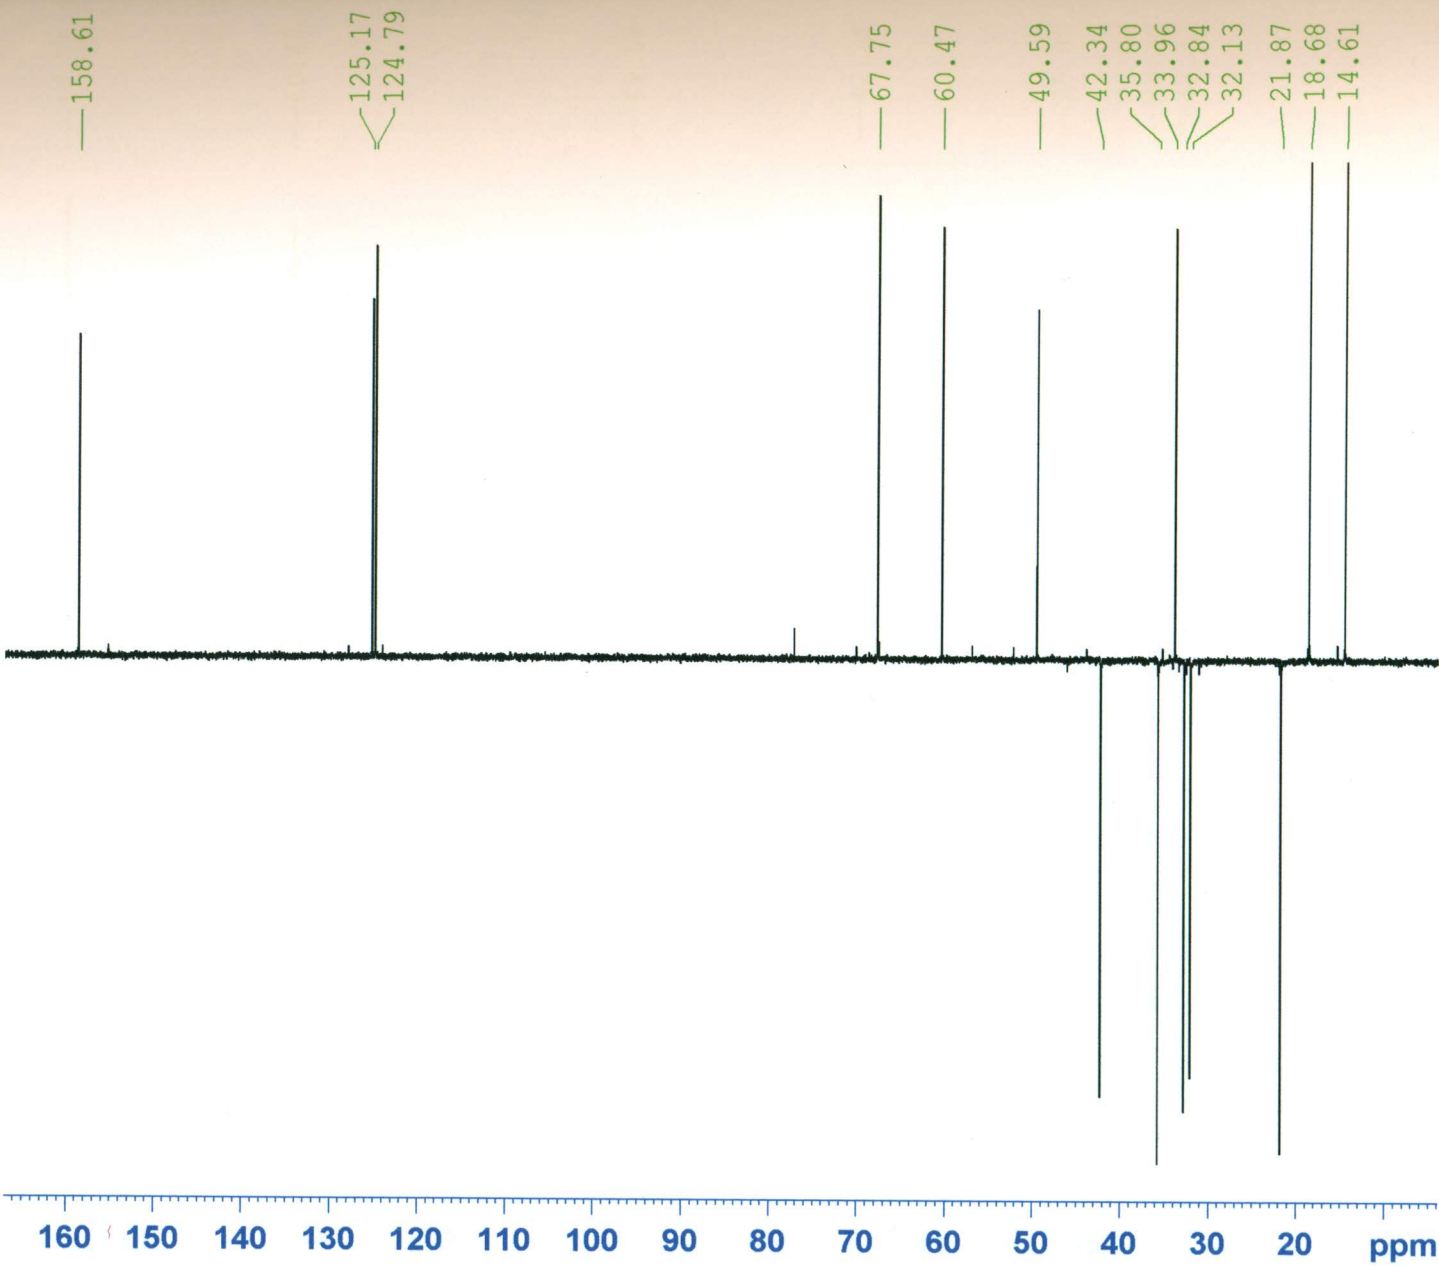

NAME Oct 25  
 EXPNO 7  
 PROCNO 1  
 Date 20091026  
 Time 8.47  
 INSTRUM spect  
 PROBHD 5 mm CPTCI 1H-  
 PULPROG deptsp135  
 TD 65536  
 SOLVENT CDC13  
 NS 444  
 DS 2  
 SWH 30303.031 Hz  
 FIDRES 0.462388 Hz  
 AQ 1.0814105 sec  
 RG 32768  
 DW 16.500 usec  
 DE 6.50 usec  
 TE 294.1 K  
 CNST2 145.0000000  
 D1 1.50000000 sec  
 D2 0.00344828 sec  
 D12 0.00002000 sec  
 TDO 6

===== CHANNEL f1 =====  
 NUC1 13C  
 P1 16.00 usec  
 P12 2000.00 usec  
 PLO 120.00 dB  
 PL1 2.00 dB  
 PLOW 0.00000000 W  
 PL1W 66.40702820 W  
 SFO1 150.9430463 MHz  
 SP2 1.99 dB  
 SPNAM2 Crp60comp.4  
 SPOAL2 0.500  
 SPOFFS2 0.00 Hz

===== CHANNEL f2 =====  
 CPDPRG2 waltz16  
 NUC2 1H  
 P3 7.50 usec  
 P4 15.00 usec  
 PCPD2 65.00 usec  
 PL2 3.30 dB  
 PL12 22.06 dB  
 PL2W 9.16420078 W  
 PL12W 0.12192553 W  
 SFO2 600.2324009 MHz  
 SI 32768  
 SF 150.9279540 MHz  
 WDW EM  
 SSB 0  
 LB 1.00 Hz  
 GB 0  
 PC 1.40

Sample: TGFZ

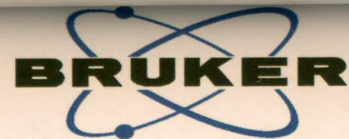

RECEIVED  
OCT 25 1988

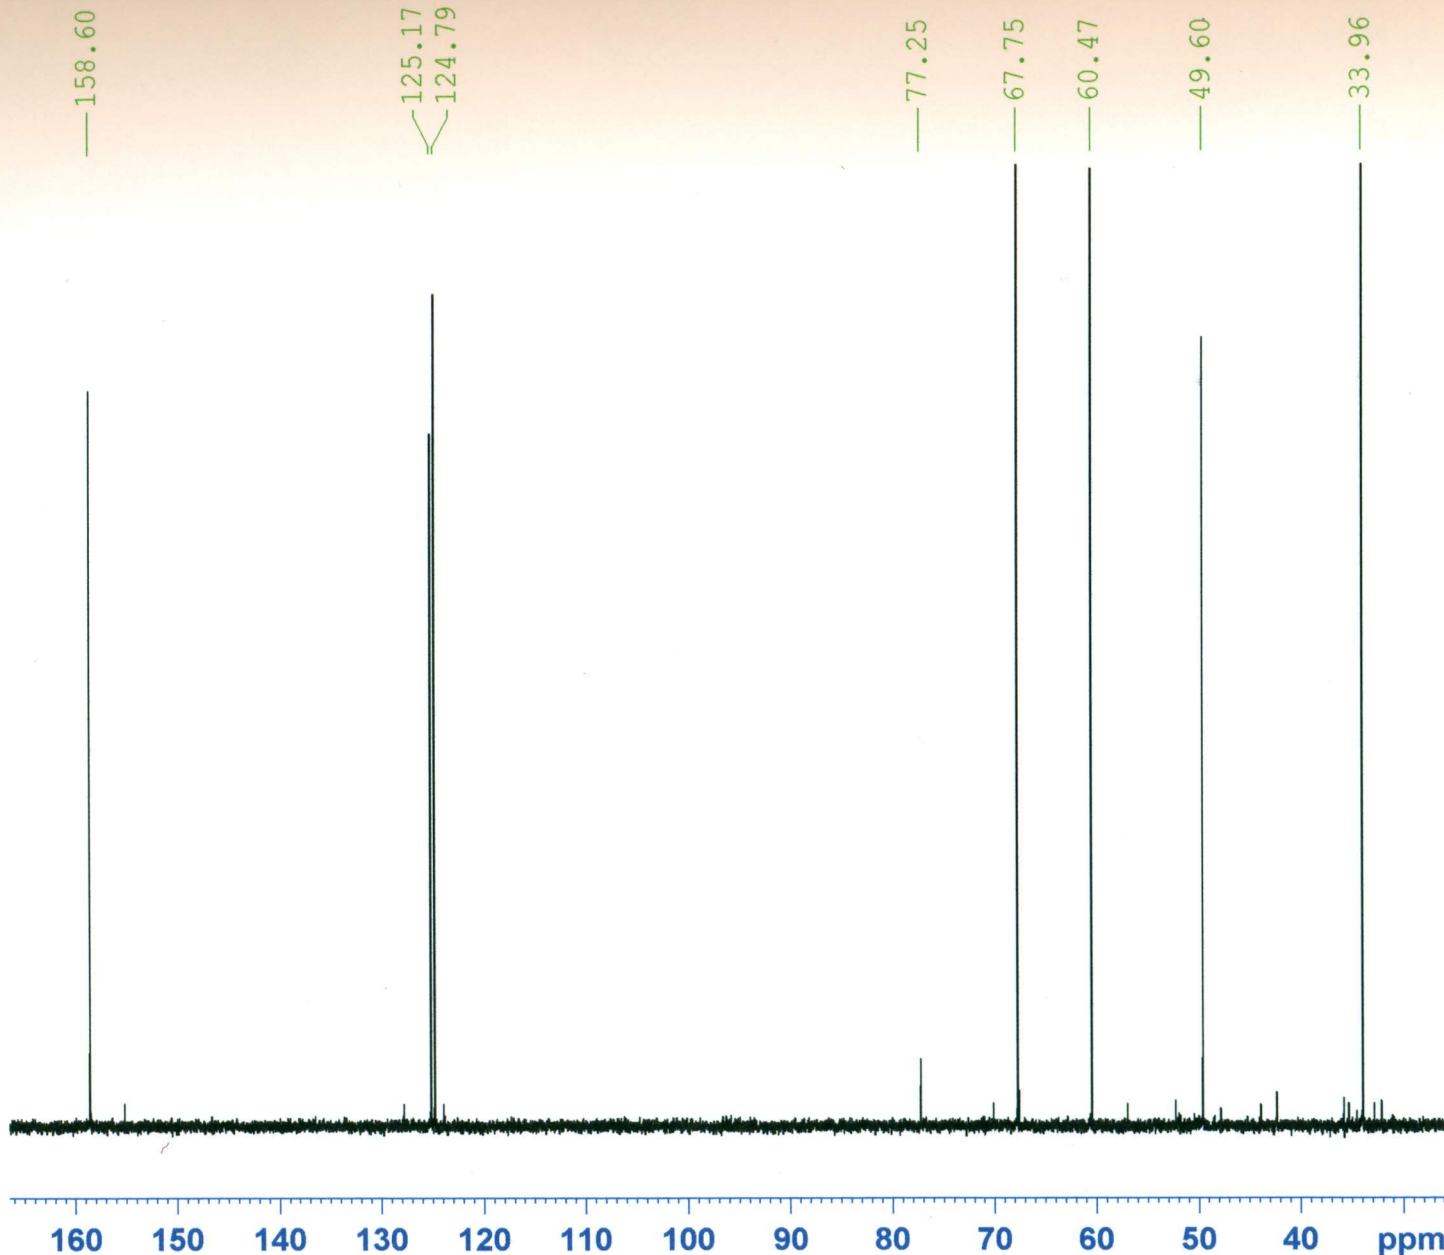

NAME Oct 25  
 EXPNO 8  
 PROCNO 1  
 Date\_ 20091026  
 Time\_ 8.58  
 INSTRUM spect  
 PROBHD 5 mm CPTCI 1H-  
 PULPROG deptsp90  
 TD 65536  
 SOLVENT CDC13  
 NS 240  
 DS 2  
 SWH 30303.031 Hz  
 FIDRES 0.462388 Hz  
 AQ 1.0814105 sec  
 RG 32768  
 DW 16.500 usec  
 DE 6.50 usec  
 TE 294.2 K  
 CNST2 145.0000000  
 D1 1.5000000 sec  
 D2 0.00344828 sec  
 D12 0.00002000 sec  
 TDO 4

===== CHANNEL f1 =====  
 NUC1 13C  
 P1 16.00 usec  
 PL2 2000.00 usec  
 PL0 120.00 dB  
 PL1 2.00 dB  
 PLOW 0.00000000 W  
 PL1W 66.40702820 W  
 SFO1 150.9430463 MHz  
 SP2 1.99 dB  
 SPNAM2 Crp60comp.4  
 SPOAL2 0.500  
 SPOFFS2 0.00 Hz

===== CHANNEL f2 =====  
 CPDPRG2 waltz16  
 NUC2 1H  
 P3 7.50 usec  
 P4 15.00 usec  
 PCPD2 65.00 usec  
 PL2 3.30 dB  
 PL12 22.06 dB  
 PL2W 9.16420078 W  
 PL12W 0.12192553 W  
 SFO2 600.2324009 MHz  
 SI 32768  
 SF 150.9279540 MHz  
 WDW EM  
 SSB 0  
 LB 1.00 Hz  
 GB 0  
 PC 1.40

Sample: TGF2

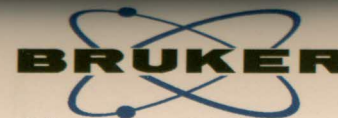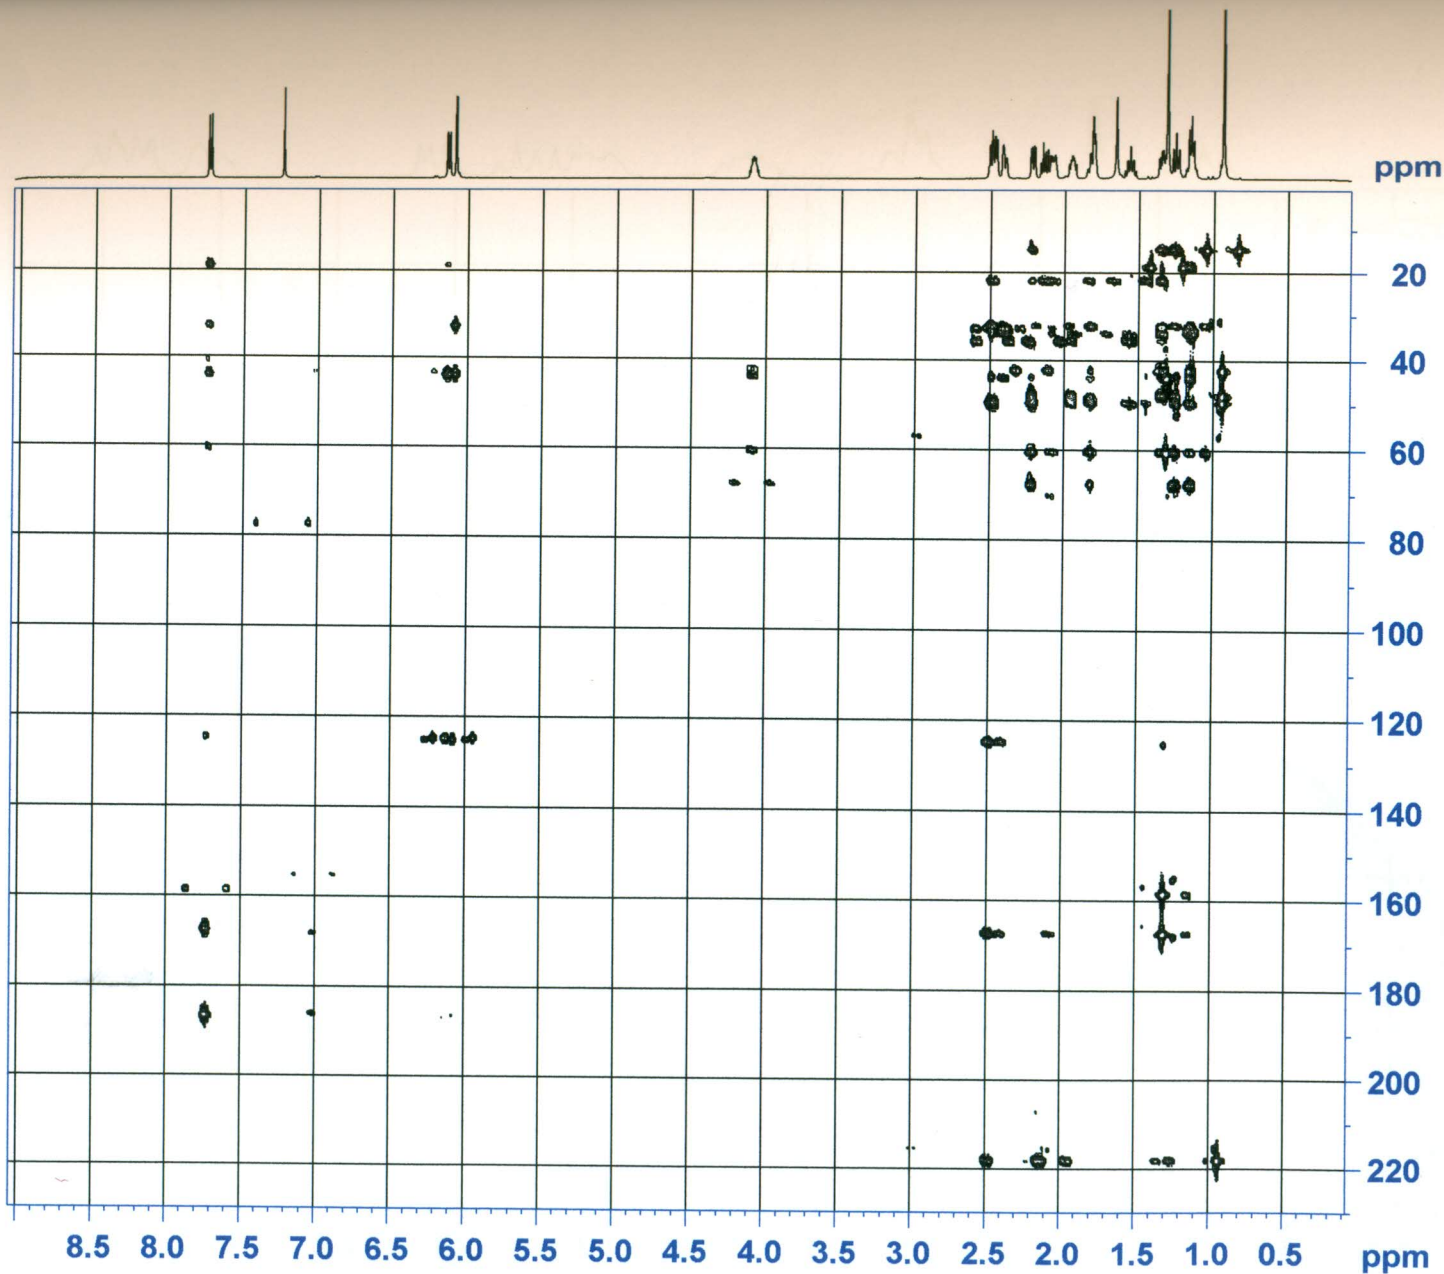

NAME Oct 25  
EXPNO 5  
PROCNO 1  
Date\_ 20091025  
Time 23.50  
INSTRUM spect  
PROBHD 5 mm CPTCF 1H-  
PULPROG hmbcgp1pndgf  
TD 4096  
SOLVENT CDCl3  
NS 32  
DS 8  
SWH 5387.931 Hz  
FIDRES 1.315413 Hz  
AQ 0.3802516 sec  
RG 32768  
DW 92.800 usec  
DE 6.50 usec  
TE 294.2 K  
CNST2 145.0000000  
CNST13 13.0000000  
D0 0.00000300 sec  
D1 1.50000000 sec  
D2 0.00344828 sec  
D6 0.03846154 sec  
D16 0.00015000 sec  
IN0 0.00001440 sec

===== CHANNEL f1 =====  
NUC1 1H  
P1 7.40 usec  
P2 14.80 usec  
PL1 3.30 dB  
PL1W 9.16420078 W  
SFO1 600.2327611 MHz

===== CHANNEL f2 =====  
NUC2 13C  
P3 10.00 usec  
PL2 2.00 dB  
PL2W 66.40702820 W  
SFO2 150.9453107 MHz

===== GRADIENT CHANNEL =====  
GPNAM1 SINE.100  
GPNAM2 SINE.100  
GPNAM3 SINE.100  
GPZ1 50.00 %  
GPZ2 30.00 %  
GPZ3 40.10 %  
P16 2000.00 usec  
ND0 2  
TD 256  
SFO1 150.9453 MHz  
FIDRES 135.614929 Hz  
SW 230.000 ppm  
FnMODE QF  
SI 1024  
SF 600.2300250 MHz  
WDW SINE  
SSB 0  
LB 0.00 Hz  
GB 0  
PC 1.40  
SI 1024  
MC2 QF  
SF 150.9279540 MHz  
WDW SINE  
SSB 0  
LB 0.00 Hz  
GB 0

Sample: TGF2

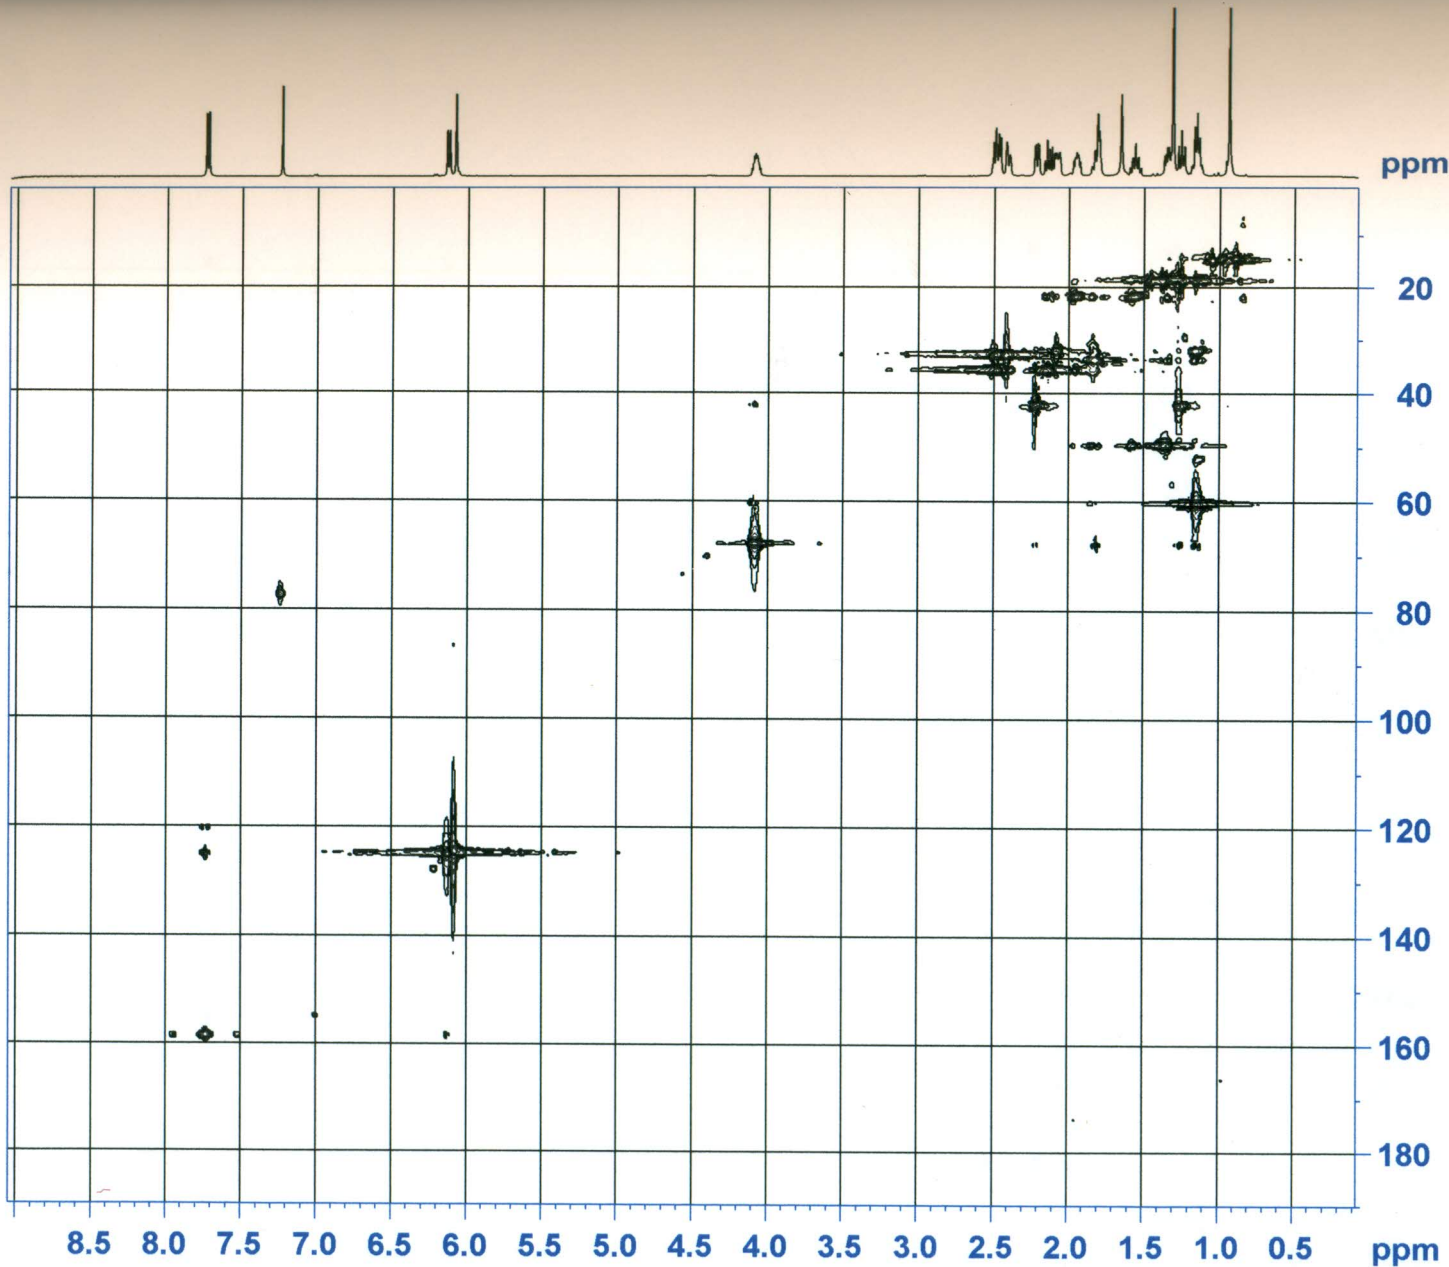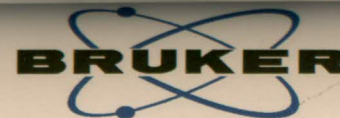

AVANCE AV 600  
LAB. NO. 100

NAME Oct 25  
EXPNO 4  
PROCNO 1  
Date 20091025  
Time 20.08  
INSTRUM spect  
PROBHD 5 mm CPTCI 1H-  
PULPROG haqcetgps1  
TD 1024  
SOLVENT CDCl3  
NS 32  
DS 8  
SWH 5387.931 Hz  
FIDRES 5.261652 Hz  
AQ 0.0951700 sec  
RG 36780.8  
DW 92.800 usec  
DE 6.50 usec  
TE 294.5 K  
CNST2 145.0000000  
D0 0.00000300 sec  
D1 1.50000000 sec  
D4 0.00172414 sec  
D11 0.03000000 sec  
D13 0.00000400 sec  
D16 0.00015000 sec  
D24 0.00110000 sec  
IN0 0.00001745 sec  
ZGOF TNS

===== CHANNEL f1 =====  
NUC1 1H  
P1 7.40 usec  
P2 14.80 usec  
P28 0.50 usec  
PL1 3.30 dB  
PL1W 9.16420078 W  
SFO1 600.2327611 MHz

===== CHANNEL f2 =====  
CPDPRG2 garp  
NUC2 13C  
P3 10.00 usec  
P4 20.00 usec  
PCPD2 60.00 usec  
PL2 2.00 dB  
PL12 17.56 dB  
PL2W 66.40702820 W  
PL12W 1.84592509 W  
SFO2 150.9422922 MHz

===== GRADIENT CHANNEL =====  
GPNAM1 SINE.100  
GPNAM2 SINE.100  
GPZ1 80.00 %  
GPZ2 20.10 %  
P16 2000.00 usec  
ND0 2  
TD 256  
SFO1 150.9423 MHz  
FIDRES 112.027481 Hz  
SW 190.000 ppm  
FnMODE Echo-Antiecho  
SI 1024  
SF 600.2300250 MHz  
WDW QSINE  
SSB 2  
LB 0.00 Hz  
GB 0  
PC 4.00  
SI 1024  
MC2 echo-antiecho  
SF 150.9279540 MHz  
WDW QSINE  
SSB 2  
LB 0.00 Hz  
GB 0

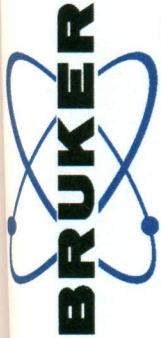

MANAGE BY 500  
LAB. No. 100

NAME Oct 25  
 EXPNO 2  
 PROCNO 1  
 Date\_ 20091025  
 Time\_ 16.23  
 INSTRUM spect  
 PROBHD 5 mm CPTCI 1H-  
 PULPROG cosydfqf  
 TD 2048  
 SOLVENT CDC13  
 NS 8  
 DS 4  
 SWH 5387.931 Hz  
 FIDRES 2.630826 Hz  
 AQ 0.1901972 sec  
 RG 35.9  
 DW 92.800 usec  
 DE 6.50 usec  
 TE 294.8 K  
 D0 0.00000300 sec  
 D1 1.50000000 sec  
 D13 0.00000400 sec  
 D20 0.00000200 sec  
 INO 0.00018560 sec

===== CHANNEL f1 =====  
 NUC1 1H  
 P1 7.40 usec  
 PL1 3.30 dB  
 PL1W 9.16420078 W  
 SFO1 600.2327611 MHz  
 NDO 1  
 TD 256  
 SFO1 600.2328 MHz  
 FIDRES 21.046606 Hz  
 SW 8.976 ppm  
 FmMODE QF  
 SI 1024  
 SF 600.2300250 MHz  
 WDW QSINE  
 SSB 0  
 LB 0.00 Hz  
 GB 0  
 PC 1.40  
 SI 1024  
 MC2 QF  
 SF 600.2300250 MHz  
 WDW QSINE  
 SSB 0  
 LB 0.00 Hz  
 GB 0

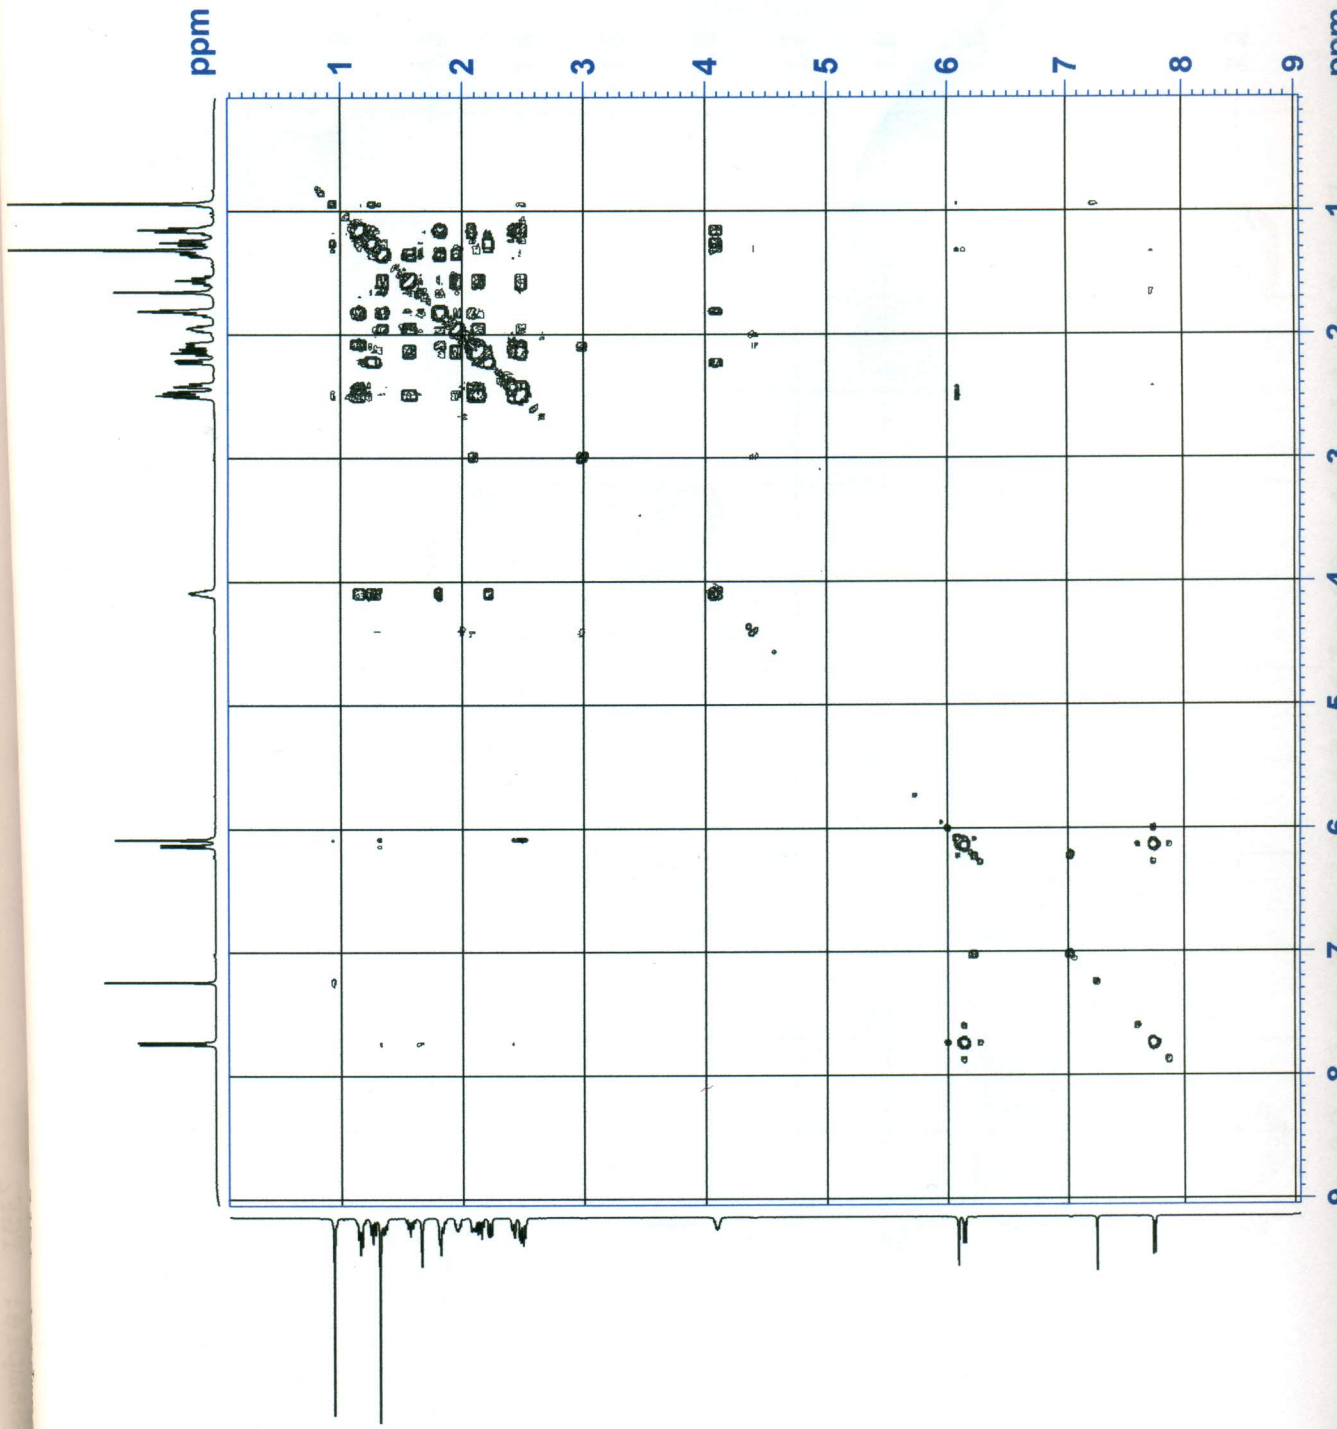

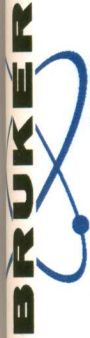

AVANCE AV 600  
No. 108

NAME Oct 25  
 EXPNO 3  
 PROCNO 1  
 Date\_ 20091025  
 Time\_ 17.23  
 INSTRUM spect  
 PROBHD 5 mm CPTCI 1H-  
 PULPROG noesygpph  
 TD 1024  
 SOLVENT CDCl3  
 NS 16  
 DS 4  
 SWH 5387.931 Hz  
 FIDRES 5.261652 Hz  
 AQ 0.0951700 sec  
 RG 57  
 DW 92.800 usec  
 DE 6.50 usec  
 TE 294.7 K  
 D0 0.00008338 sec  
 D1 1.50000000 sec  
 D8 0.80000001 sec  
 D16 0.00015000 sec  
 INO 0.00018560 sec

==== CHANNEL f1 =====  
 NUC1 1H  
 P1 7.40 usec  
 P2 14.80 usec  
 PL1 3.30 dB  
 PL1W 9.16420078 W  
 SF01 600.2327611 MHz

==== GRADIENT CHANNEL =====  
 GPNAM1 SINE.100  
 GPNAM2 SINE.100  
 GPZ1 40.00 %  
 GPZ2 -40.00 %  
 P16 2000.00 usec  
 NDO 1  
 TD 256  
 SF01 600.2328 MHz  
 FIDRES 21.046606 Hz  
 SW 8.976 ppm  
 FhMODE States-TPPI  
 SI 1024  
 SF 600.2300250 MHz  
 WDW QSINE  
 SSB 2  
 LB 0.00 Hz  
 GB 0  
 PC 1.40  
 SI 1024  
 MC2 States-TPPI  
 SF 600.2300250 MHz  
 WDW QSINE  
 SSB 2  
 LB 0.00 Hz  
 GB 0

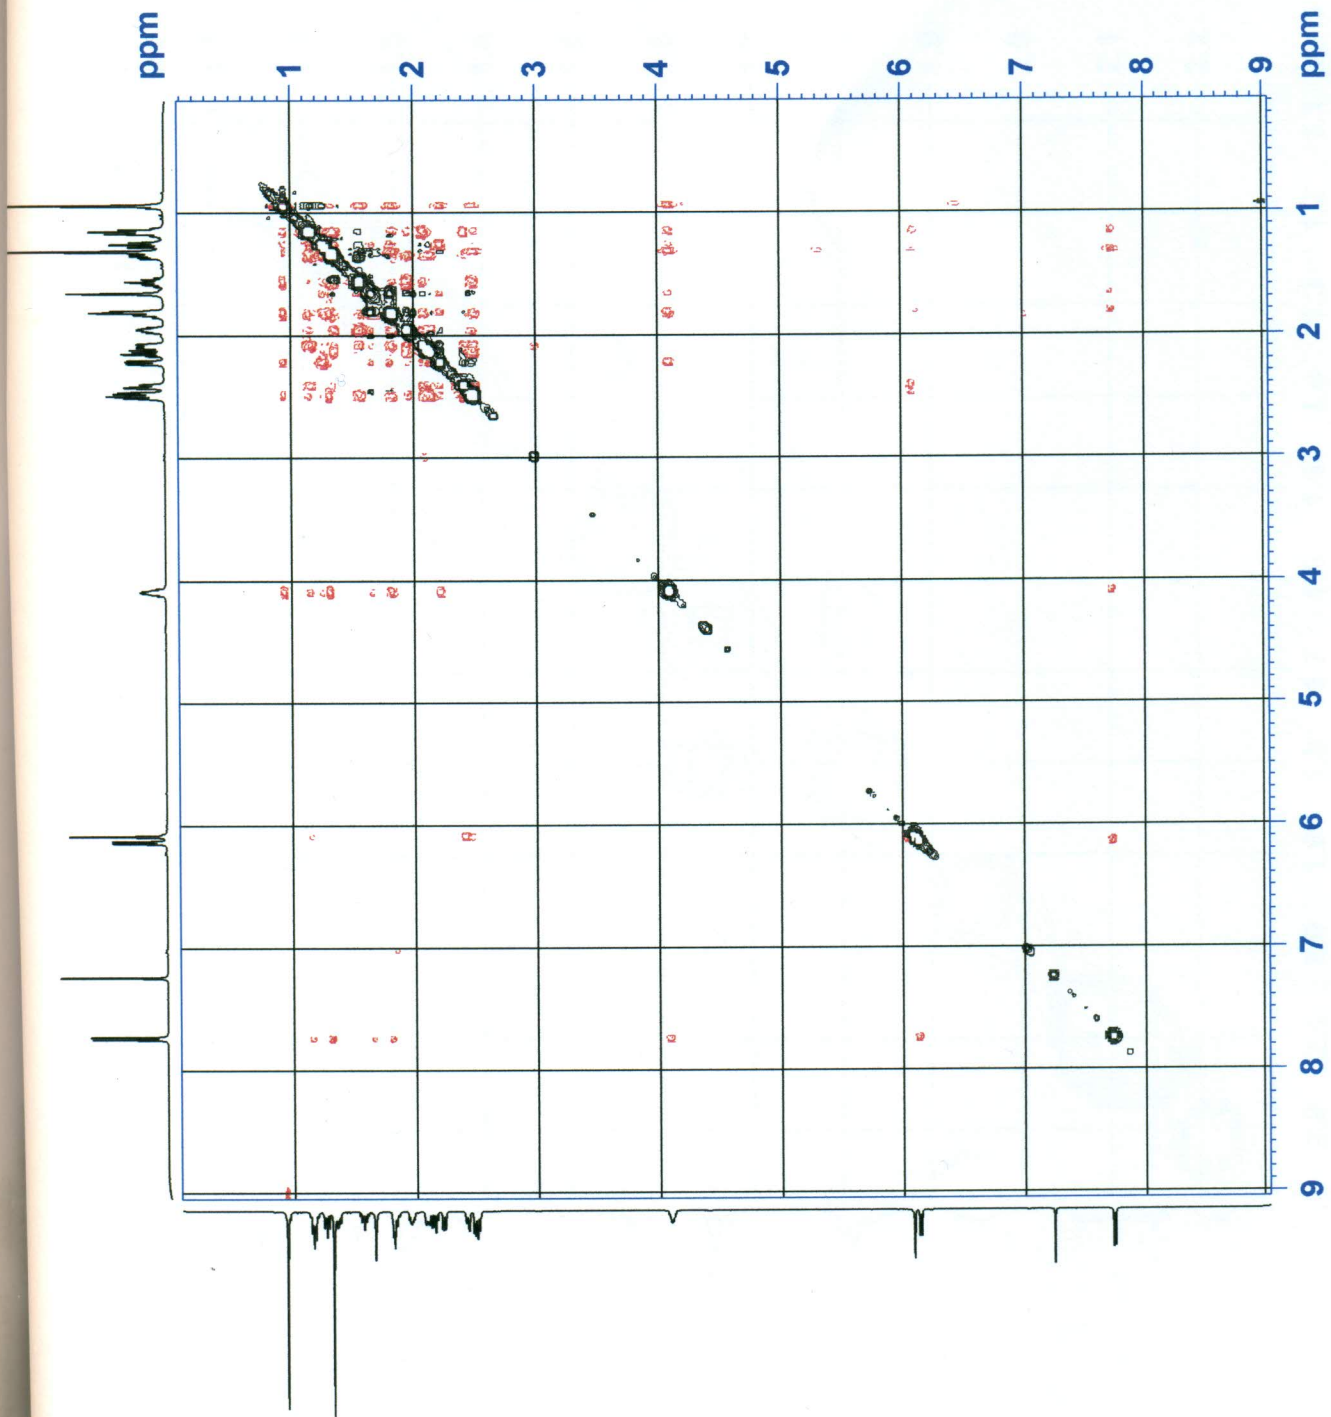

Supplement: 1752-153X-7-164-S6.pdf [file 1752-153X-7-164-S6.pdf]
