# Supplementary material for: Molecular docking simulation studies on potent butyrylcholinesterase inhibitors obtained from microbial transformation of dihydrotestosterone
Source: PubMed Central journal article supplement (PMC4126177; doi:10.1186/1752-153x-7-164), 2013-10-08
Supplement: 1752-153X-7-164-S5.pdf [file 1752-153X-7-164-S5.pdf]

Salman/Dr, Iqbal/TGF-7-31/

AVANCE 400-A  
LAB. No. 109  
Oct 08

7.240  
5.726  
4.058  
4.045  
4.032  
2.664  
2.653  
2.641  
2.630  
2.619  
2.509  
2.486  
2.460  
2.438  
2.425  
2.416  
2.404  
2.384  
2.370  
2.355  
2.327  
2.295  
2.148  
2.143  
2.119  
2.107  
2.095  
2.014  
2.003  
1.980  
1.968  
1.955  
1.937  
1.919  
1.708  
1.702  
1.680  
1.674  
1.640  
1.536  
1.505  
1.416  
1.402  
1.386  
1.374  
1.316  
1.297  
1.276  
1.200  
1.172  
1.146  
1.121  
0.921

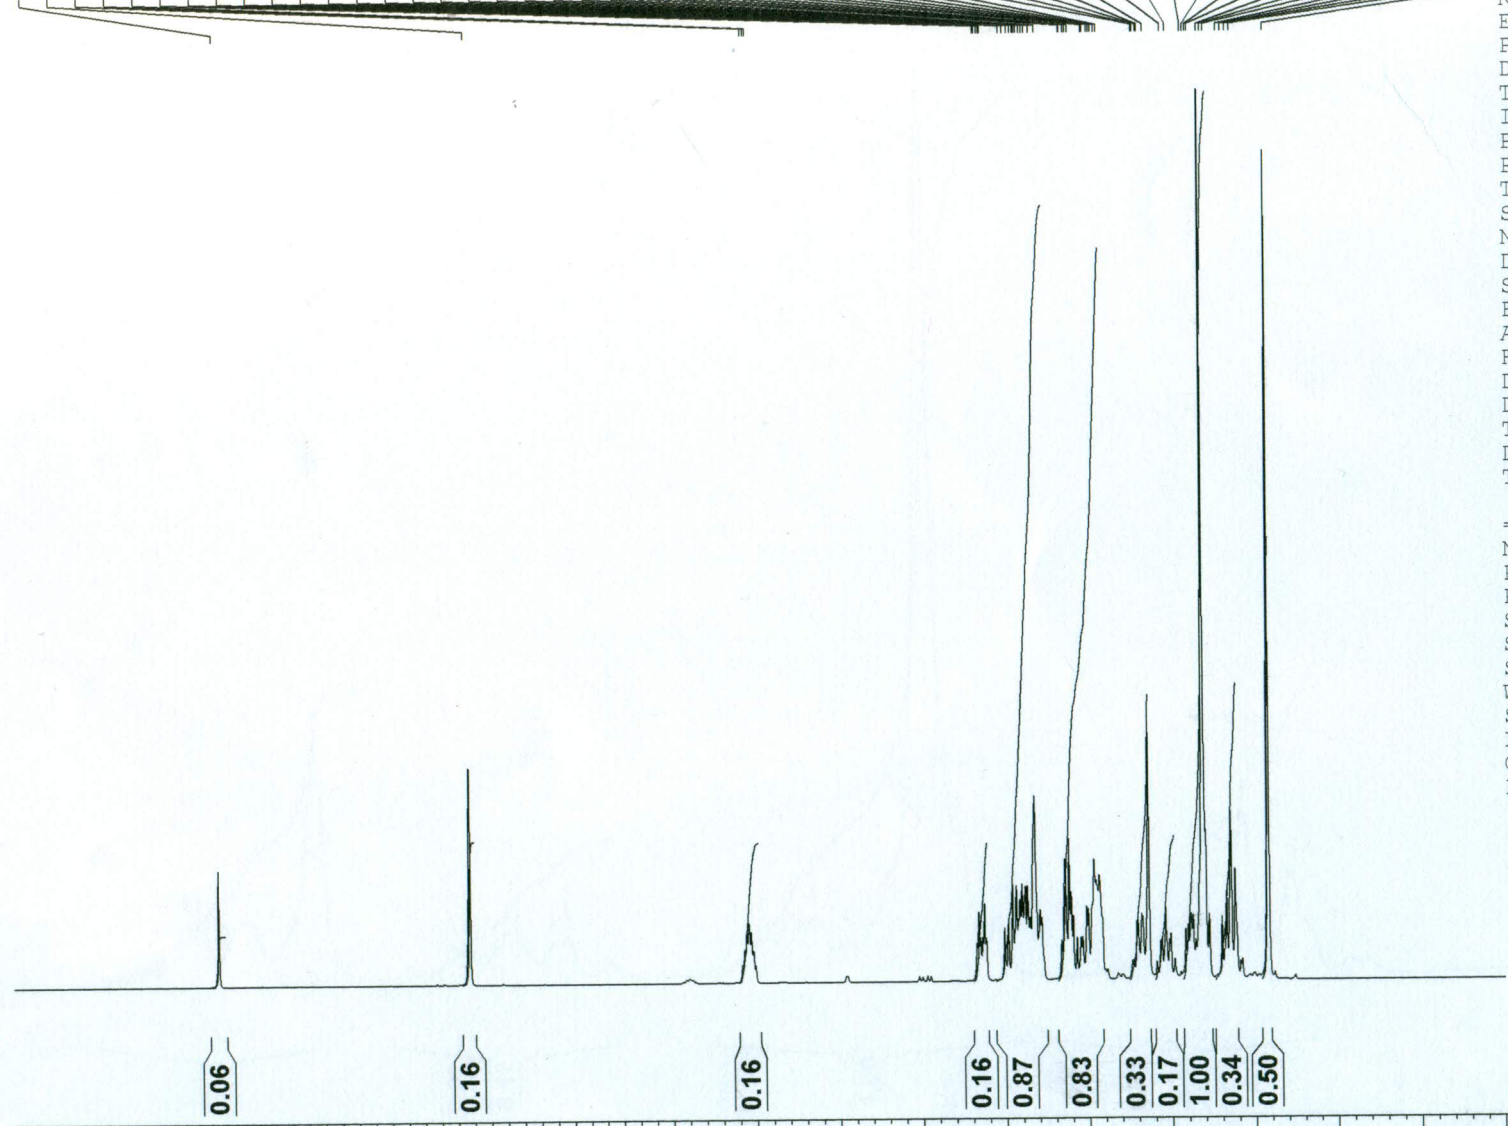

NAME  
EXPNO 3  
PROCNO 1  
Date\_ 20091008  
Time 10.52  
INSTRUM spect  
PROBHD 5 mm Dual 13C/  
PULPROG zg30  
TD 32768  
SOLVENT CDCl3  
NS 64  
DS 0  
SWH 8012.820 Hz  
FIDRES 0.244532 Hz  
AQ 2.0447731 sec  
RG 114  
DW 62.400 usec  
DE 6.50 usec  
TE 300.6 K  
D1 1.00000000 sec  
TDO 1

==== CHANNEL f1 =====  
NUC1 1H  
P1 8.10 usec  
PL1 4.00 dB  
SFO1 400.2328016 MHz  
SI 16384  
SF 400.2300132 MHz  
WDW EM  
SSB 0  
LB 0.30 Hz  
GB 0  
PC 2.00

8.0 7.5 7.0 6.5 6.0 5.5 5.0 4.5 4.0 3.5 3.0 2.5 2.0 1.5 1.0 0.5 ppm

SALMAN ZAFAR/DR. IQBAL/TGF7-3-1/

LAB No. 109-B

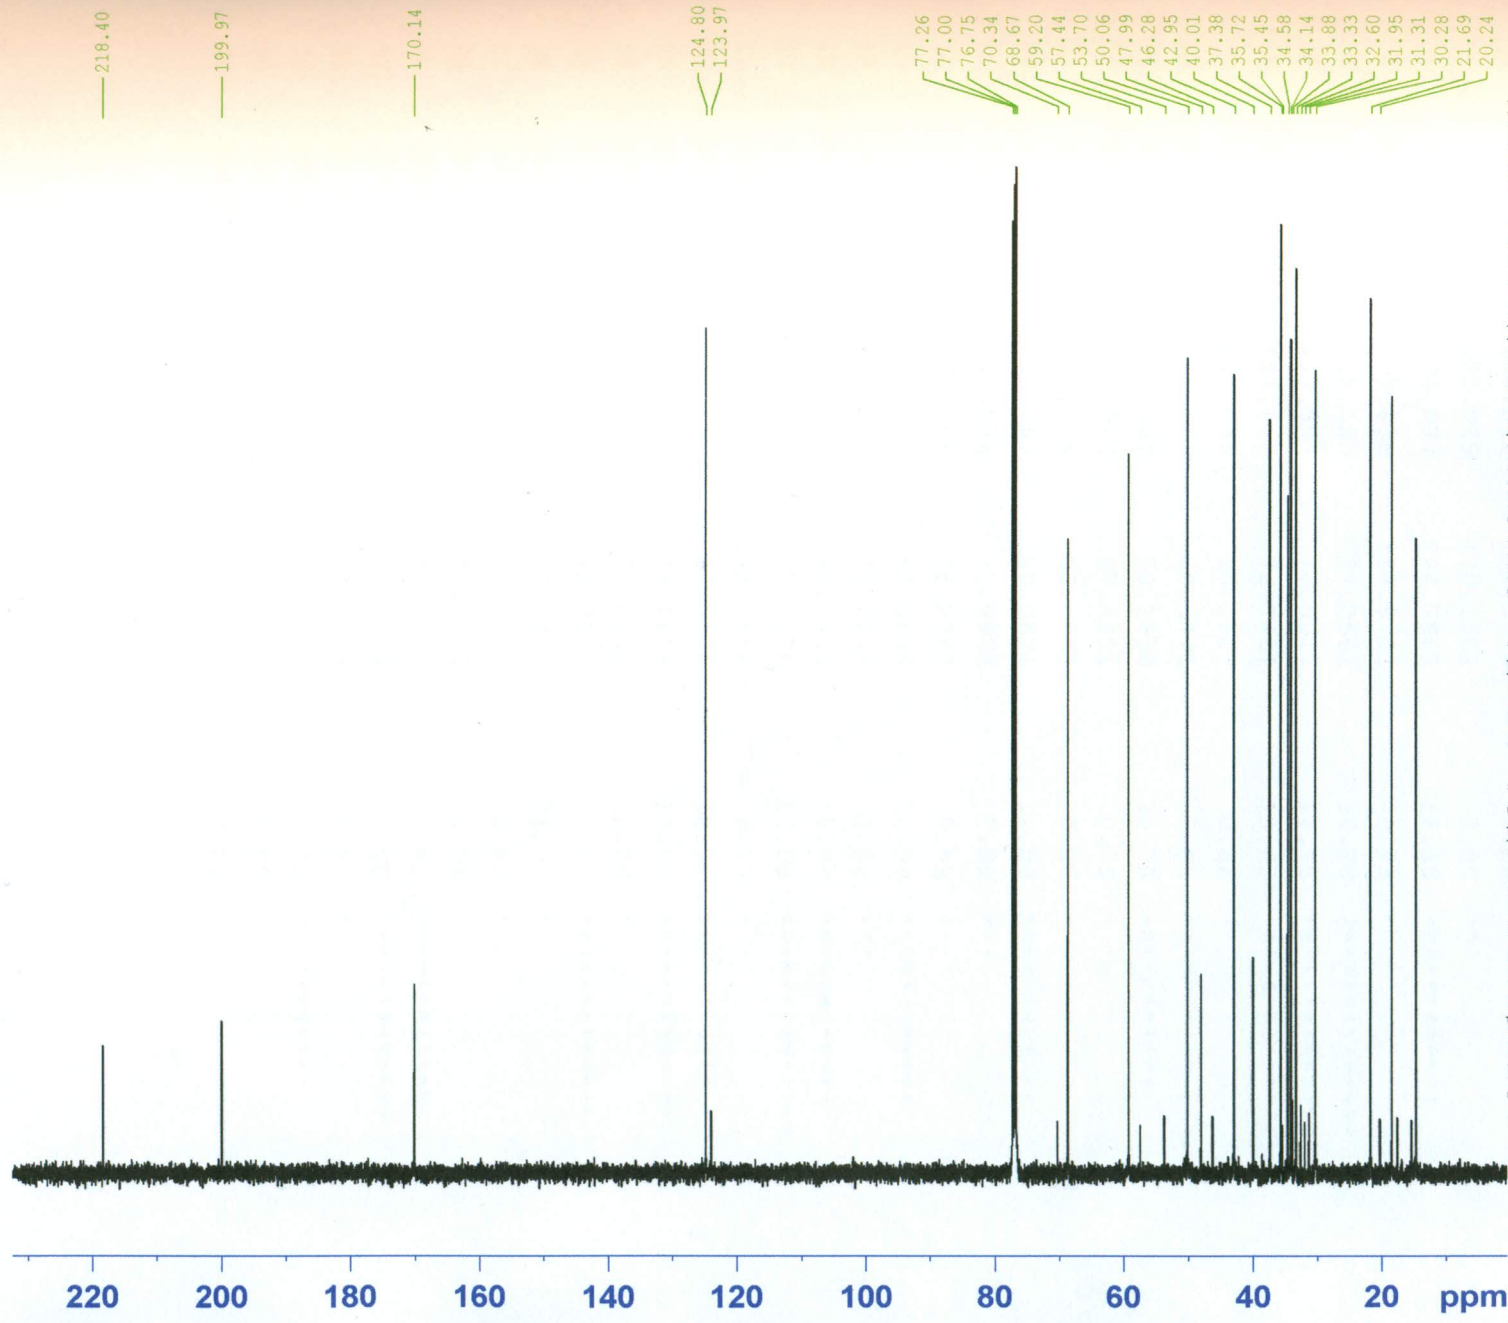

NAME oct27  
EXPNO 13  
PROCNO 1  
Date\_ 20091028  
Time\_ 5.42  
INSTRUM spect  
PROBHD 5 mm BBI 1H-BB  
PULPROG zgpg  
TD 65536  
SOLVENT CDC13  
NS 3860  
DS 0  
SWH 29498.525 Hz  
FIDRES 0.450112 Hz  
AQ 1.1109022 sec  
RG 32768  
DW 16.950 usec  
DE 6.50 usec  
TE 303.5 K  
D1 1.5000000 sec  
D11 0.0300000 sec  
TD0 10

===== CHANNEL f1 =====  
NUC1 13C  
P1 11.10 usec  
PL1 -3.00 dB  
SFO1 125.7723529 MHz

===== CHANNEL f2 =====  
CPDPRG2 waltz16  
NUC2 1H  
PCPD2 100.00 usec  
PL2 6.00 dB  
PL12 29.48 dB  
PL13 23.00 dB  
SFO2 500.1325007 MHz  
SI 32768  
SF 125.7577908 MHz  
WDW EM  
SSB 0  
LB 1.00 Hz  
GB 0  
PC 1.40

ADVANCE 500  
LAB No. 109-B

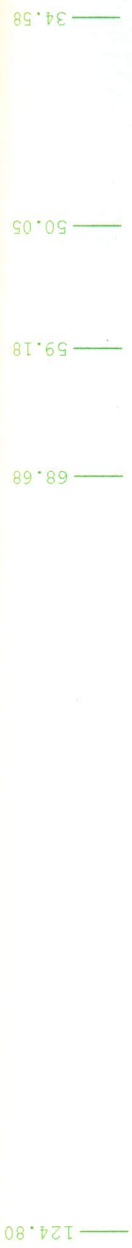

NAME oct27  
EXPNO 15  
PROCNO 1  
Date\_ 20091028  
Time 9.33  
INSTRUM spect  
PROBHD 5 mm BBI 1H-BB  
PULPROG deptsp90  
TD 32768  
SOLVENT CDC13  
NS 889  
DS 2  
SWH 23809.523 Hz  
FIDRES 0.726609 Hz  
AQ 0.6881990 sec  
RG 32768  
DW 21.000 usec  
DE 6.50 usec  
TE 304.3 K  
CNST2 145.0000000  
D1 1.500000000 sec  
D2 0.00344828 sec  
D12 0.00002000 sec  
TD0 5

==== CHANNEL f1 =====  
NUC1 13C  
P1 11.10 usec  
P12 2000.00 usec  
PL0 120.00 dB  
PL1 -3.00 dB  
SFO1 125.7697360 MHz  
SP2 1.99 dB  
SPNAM2 Crp60comp.4  
SFOAL2 0.500  
SPOFFS2 0.00 Hz

==== CHANNEL f2 =====  
CPDPRG2 waltz16  
NUC2 1H  
P3 7.20 usec  
P4 14.40 usec  
PCPD2 100.00 usec  
PL2 6.00 dB  
PL12 29.50 dB  
SFO2 500.1335009 MHz  
SI 32768  
SF 125.7577908 MHz  
WDW EM  
SSB 0  
LB 1.00 Hz  
GB 0  
PC 1.40

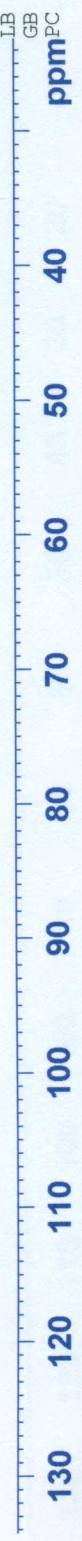

SALMAN ZAFAR/DR. IQBAL/TGF7-3-1/

AVANCE 500  
INSTR. No. 109-B

124.80  
123.97

70.34  
68.68

59.18  
57.41

53.69

50.05

46.29

42.95

37.37

35.73

35.44

34.57

34.14

33.92

33.33

32.63

31.98

31.28

30.26

21.72

20.24

18.36

17.50

15.33

14.66

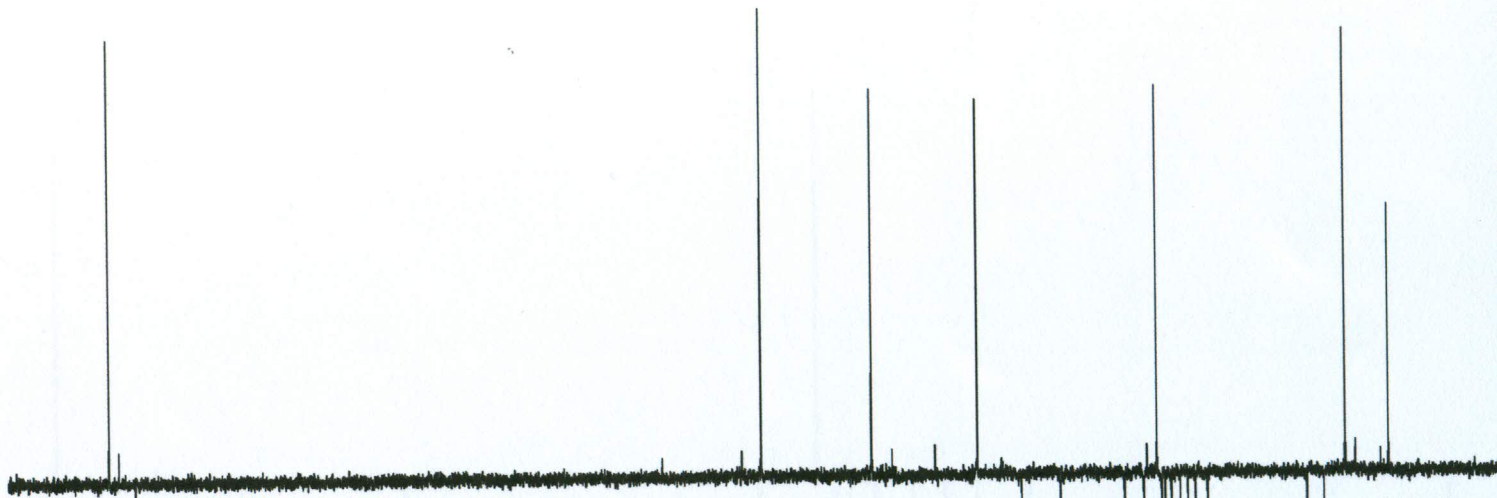

NAME oct27  
 EXPNO 14  
 PROCNO 1  
 Date 20091028  
 Time 8.27  
 INSTRUM spect  
 PROBHD 5 mm BBI 1H-BB  
 PULPROG deptsp135  
 TD 32768  
 SOLVENT CDC13  
 NS 2236  
 DS 2  
 SWH 23809.523 Hz  
 FIDRES 0.726609 Hz  
 AQ 0.6881990 sec  
 RG 32768  
 DW 21.000 usec  
 DE 6.50 usec  
 TE 303.9 K  
 CNST2 145.0000000  
 D1 1.50000000 sec  
 D2 0.00344828 sec  
 D12 0.00002000 sec  
 TD0 8

==== CHANNEL f1 =====  
 NUC1 13C  
 P1 11.10 usec  
 P12 2000.00 usec  
 PL0 120.00 dB  
 PL1 -3.00 dB  
 SFO1 125.7697360 MHz  
 SP2 1.99 dB  
 SPNAM2 Crp60comp.4  
 SPOAL2 0.500  
 SPOFFS2 0.00 Hz

==== CHANNEL f2 =====  
 CPDPRG2 waltz16  
 NUC2 1H  
 P3 7.20 usec  
 P4 14.40 usec  
 PCPD2 100.00 usec  
 PL2 6.00 dB  
 PL12 29.50 dB  
 SFO2 500.1335009 MHz  
 SI 32768  
 SF 125.7577908 MHz  
 WDW EM  
 SSB 0  
 LB 1.00 Hz  
 GB 0  
 PC 1.40

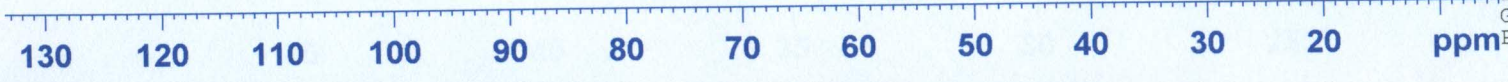

SALMAN ZAFAR/DR. IQBAL/TGF7-3-1/

AVA 500  
LAB 109-B

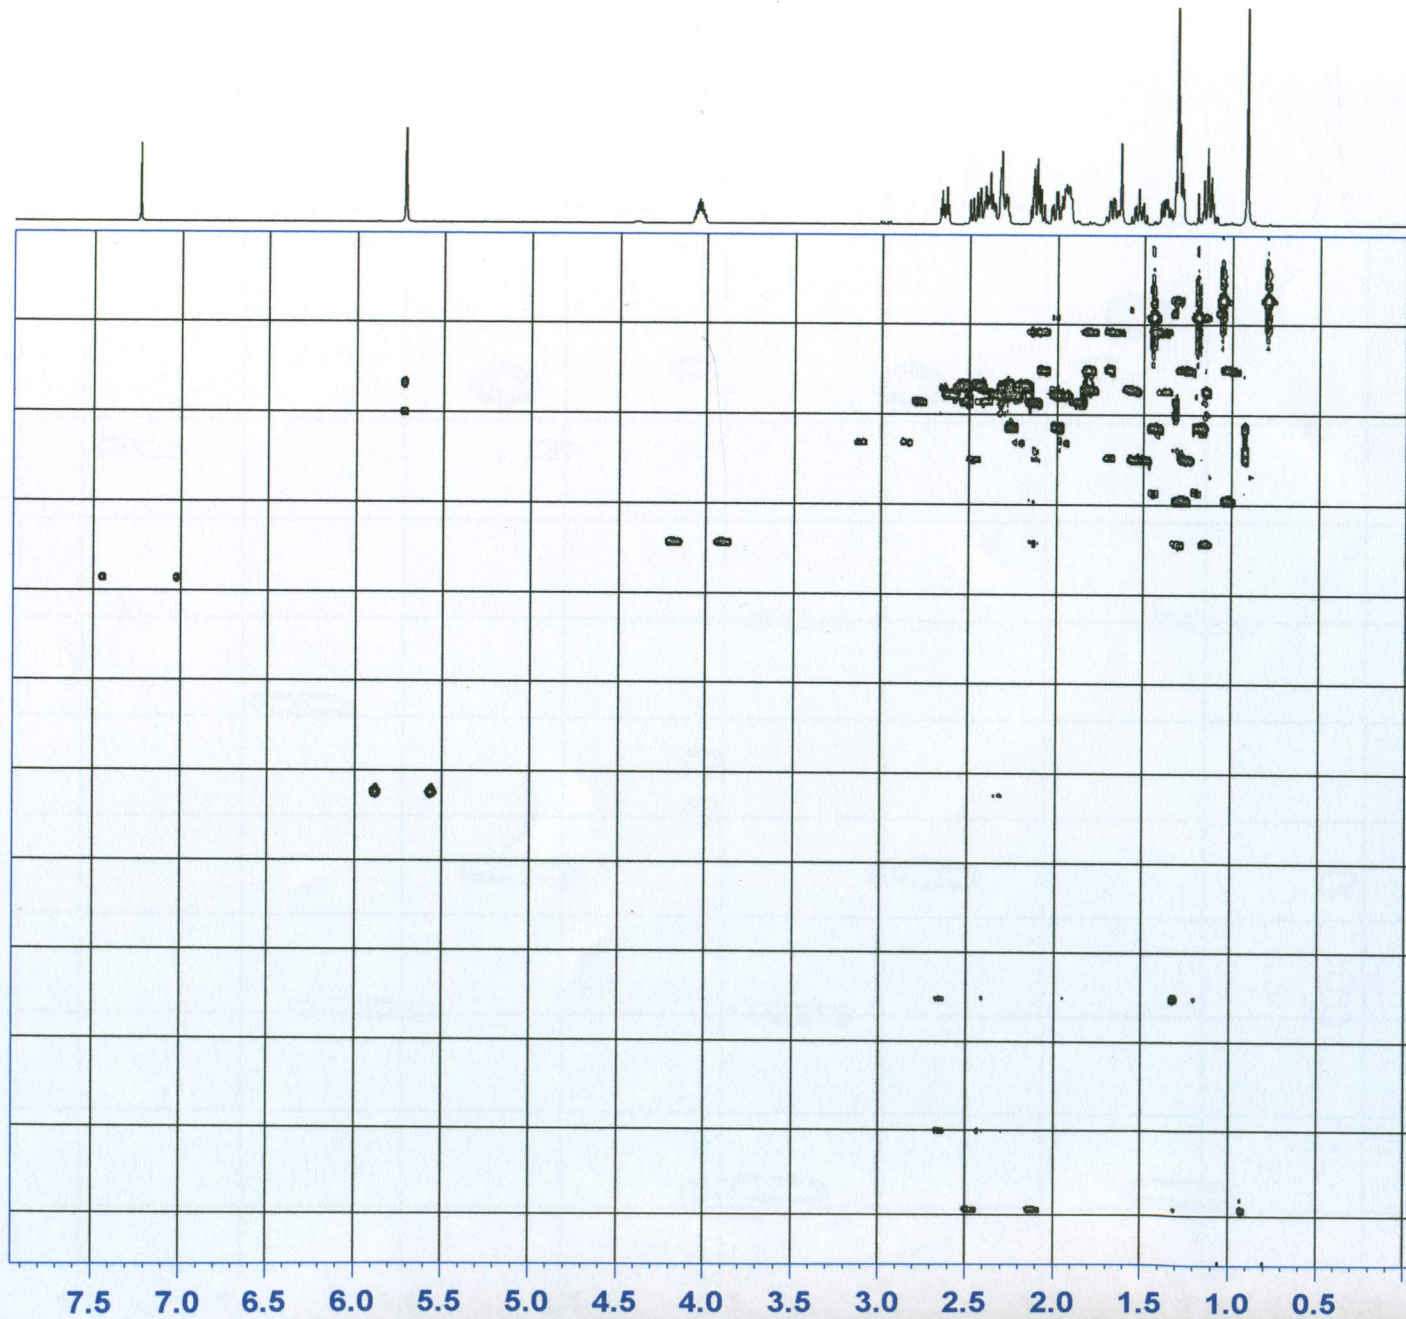

NAME oct27  
EXPNO 12  
PROCNO 1  
Date\_ 20091027  
Time 19.45  
INSTRUM spect  
PROBHD 5 mm BBI 1H-BB  
PULPROG hmbcgpndqf  
TD 4096  
SOLVENT CDCl3  
NS 64  
DS 8  
20 SWH 4006.410 Hz  
FIDRES 0.978127 Hz  
AQ 0.5113556 sec  
RG 23170.5  
40 DW 124.800 usec  
DE 6.50 usec  
TE 302.9 K  
CNST13 145.000000  
60 D0 0.00000300 sec  
D1 1.50000000 sec  
D6 0.00344828 sec  
D16 0.00020000 sec  
INO 0.00001715 sec  
80 ----- CHANNEL f1 -----  
NUC1 1H  
P1 6.70 usec  
P2 13.40 usec  
PL1 6.00 dB  
100 SFO1 500.1320005 MHz  
----- CHANNEL f2 -----  
120 NUC2 13C  
P3 11.10 usec  
PL2 -3.00 dB  
SFO2 125.7723769 MHz  
140 ----- GRADIENT CHANNEL -----  
GPNAM1 SINE.100  
GPNAM2 SINE.100  
GPNAM3 SINE.100  
GPZ1 50.00 %  
GPZ2 30.00 %  
GPZ3 40.10 %  
160 P16 1000.00 usec  
ND0 2  
TD 256  
180 SFO1 125.7724 MHz  
FIDRES 113.981216 Hz  
SW 232.000 ppm  
FnMODE QF  
SI 1024  
SF 500.1300232 MHz  
200 WDW QSINE  
SSB 0  
LB 0.00 Hz  
GB 0  
220 PC 4.00  
SI 1024  
MC2 QF  
SF 125.7577908 MHz  
WDW QSINE  
SSB 0  
LB 0.00 Hz  
GB 0

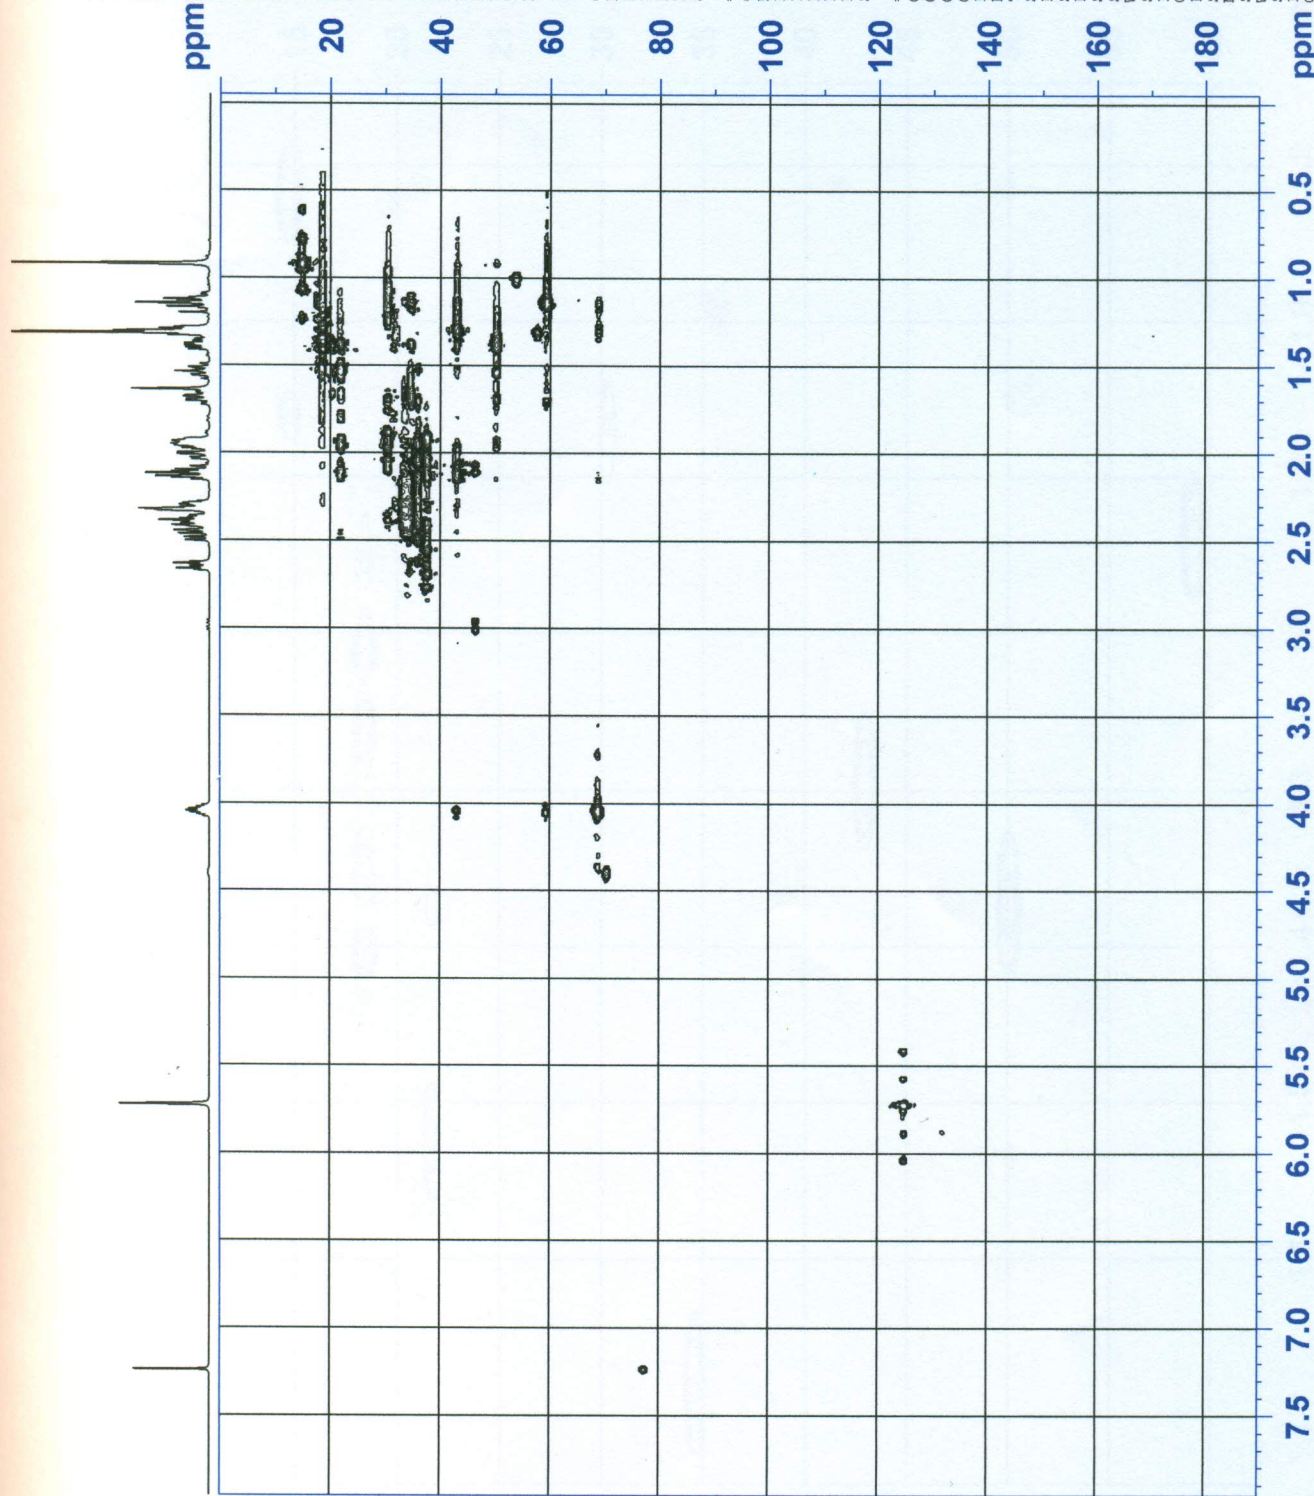

```

NAME oct27
EXPNO 11
PROCNO 1
Date_ 20091027
Time_ 15.58
INSTRUM spect
PROBHD 5 mm BBI 1H-BB
PULPROG hsqcqtgpsi
TD 1024
SOLVENT CDCl3
NS 32
DS 0
SWH 4006.410 Hz
FIDRES 3.912510 Hz
AQ 0.1279700 sec
RG 14596.5
LW 124.800 usec
DE 6.50 usec
TE 302.7 K
CNST2 145.0000000
D0 0.00000300 sec
D1 1.50000000 sec
D4 0.00172414 sec
D11 0.03000000 sec
D13 0.00000400 sec
D16 0.00015000 sec
D24 0.00110000 sec
IN0 0.00002090 sec
ZGPGTNS

===== CHANNEL f1 =====
NUC1 1H
P1 6.70 usec
P2 13.40 usec
P3 1000.00 usec
PL1 6.00 dB
SFO1 500.1320005 MHz

===== CHANNEL f2 =====
CPDPRG2 garp
NUC2 13C
P3 11.10 usec
P4 22.20 usec
PCPD2 100.00 usec
PL2 -3.00 dB
PL12 18.00 dB
SFO2 125.7697360 MHz

===== GRADIENT CHANNEL =====
GPNM1 SINE 100
GPNM2 SINE 100
GPZ1 80.00 %
GPZ2 20.10 %
P16 1500.00 usec
ND0 2
TD 256
SFO1 125.7697 MHz
FIDRES 93.344727 Hz
SW 190.000 ppm
FmMODE Echo-Antiecho
SI 1024
SF 500.1300232 MHz
WDW QSINE
SSB 2
LB 0.00 Hz
GB 0
PC 4.00
SI 1024
MC2 echo-antiecho
SF 125.7577908 MHz
WDW QSINE
SSB 2
LB 0.00 Hz
GB 0
    
```

LAB No. 109-B

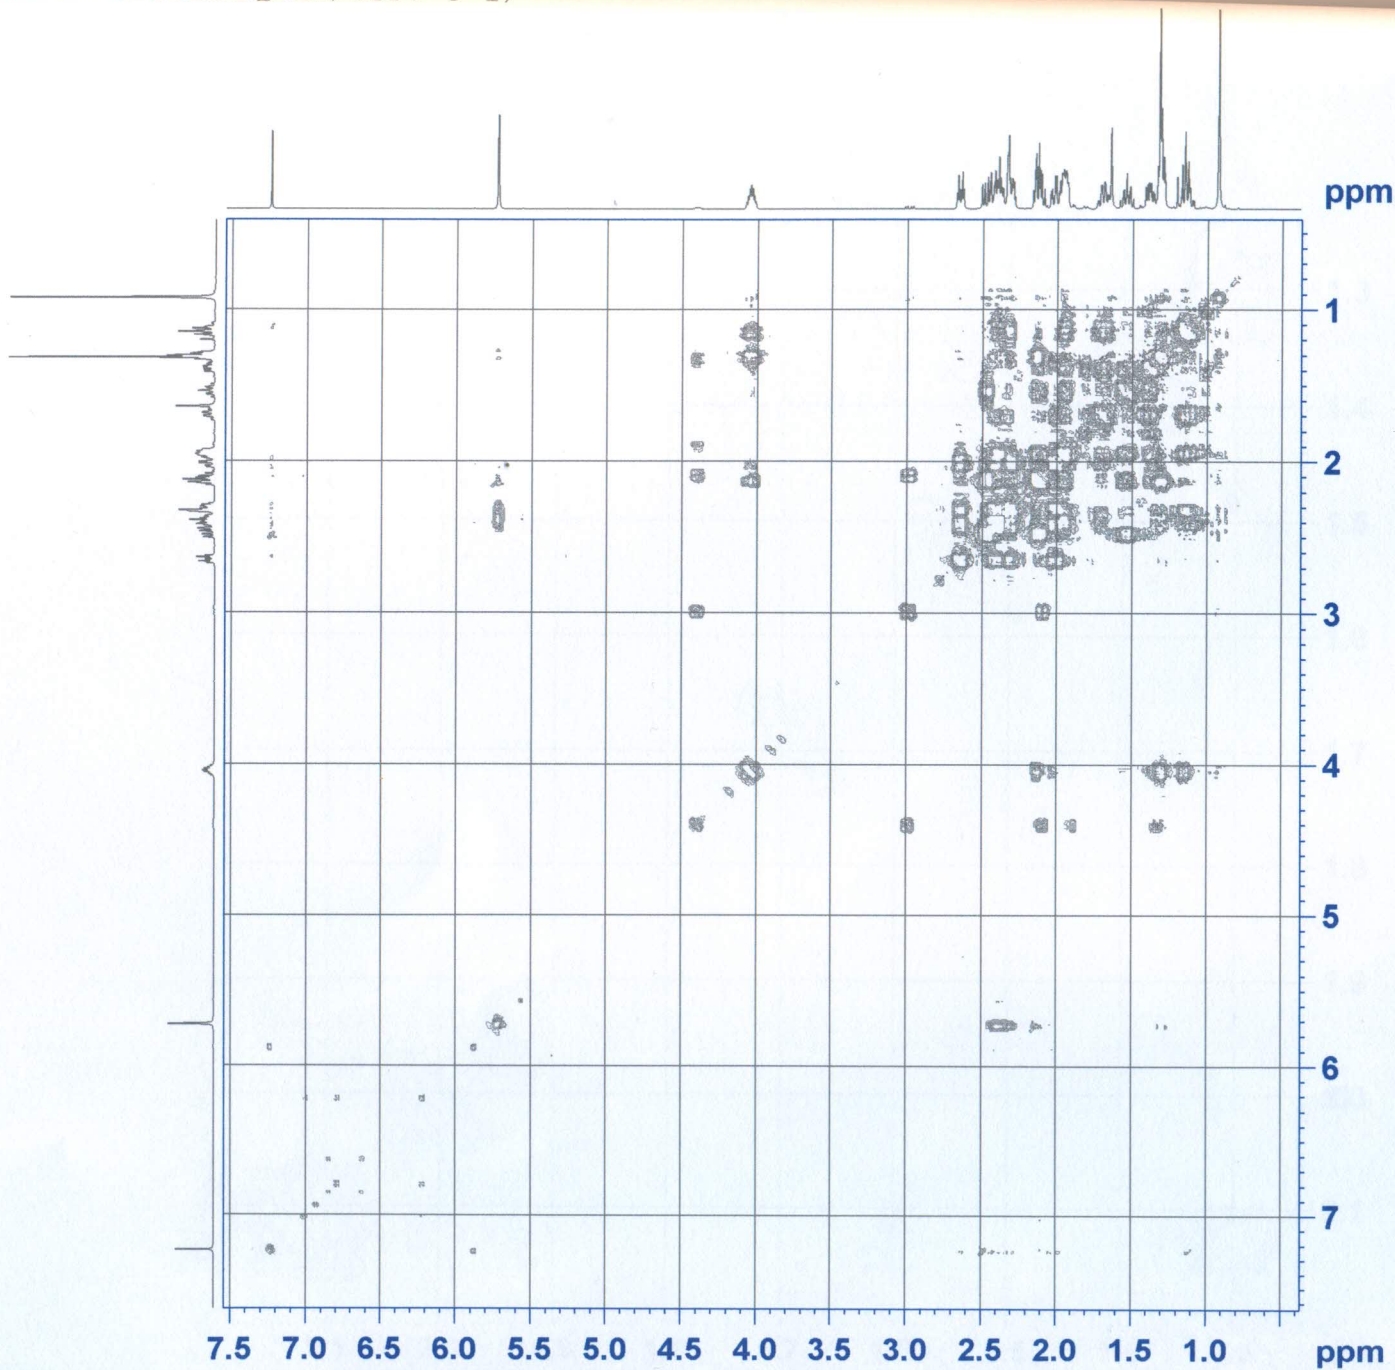

NAME oct27  
 EXPNO 9  
 PROCNO 1  
 Date\_ 20091027  
 Time\_ 12.00  
 INSTRUM spect  
 PROBHD 5 mm BBI 1H-BB  
 PULPROG cosydfqf  
 TD 2048  
 SOLVENT CDC13  
 NS 8  
 DS 8  
 SWH 4006.410 Hz  
 FIDRES 1.956255 Hz  
 AQ 0.2557652 sec  
 RG 71.8  
 DW 124.800 usec  
 DE 6.50 usec  
 TE 304.6 K  
 D0 0.00000300 sec  
 D1 1.50000000 sec  
 D13 0.00000400 sec  
 D20 0.00000200 sec  
 INO 0.00024960 sec

===== CHANNEL f1 =====  
 NUC1 1H  
 P1 6.70 usec  
 PL1 6.00 dB  
 SFO1 500.132005 MHz  
 NDO 1  
 TD 256  
 SFO1 500.132 MHz  
 FIDRES 15.650039 Hz  
 SW 8.011 ppm  
 FrMODE QF  
 SI 1024  
 SF 500.1300232 MHz  
 WDW SINE  
 SSB 0  
 LB 0.00 Hz  
 GB 0  
 PC 4.00  
 SI 1024  
 MC2 QF  
 SF 500.1300232 MHz  
 WDW SINE  
 SSB 0  
 LB 0.00 Hz  
 GB 0

SALMAN ZAFAR/DR. IQBAL/TGF7-3-1/

LAB No. 102

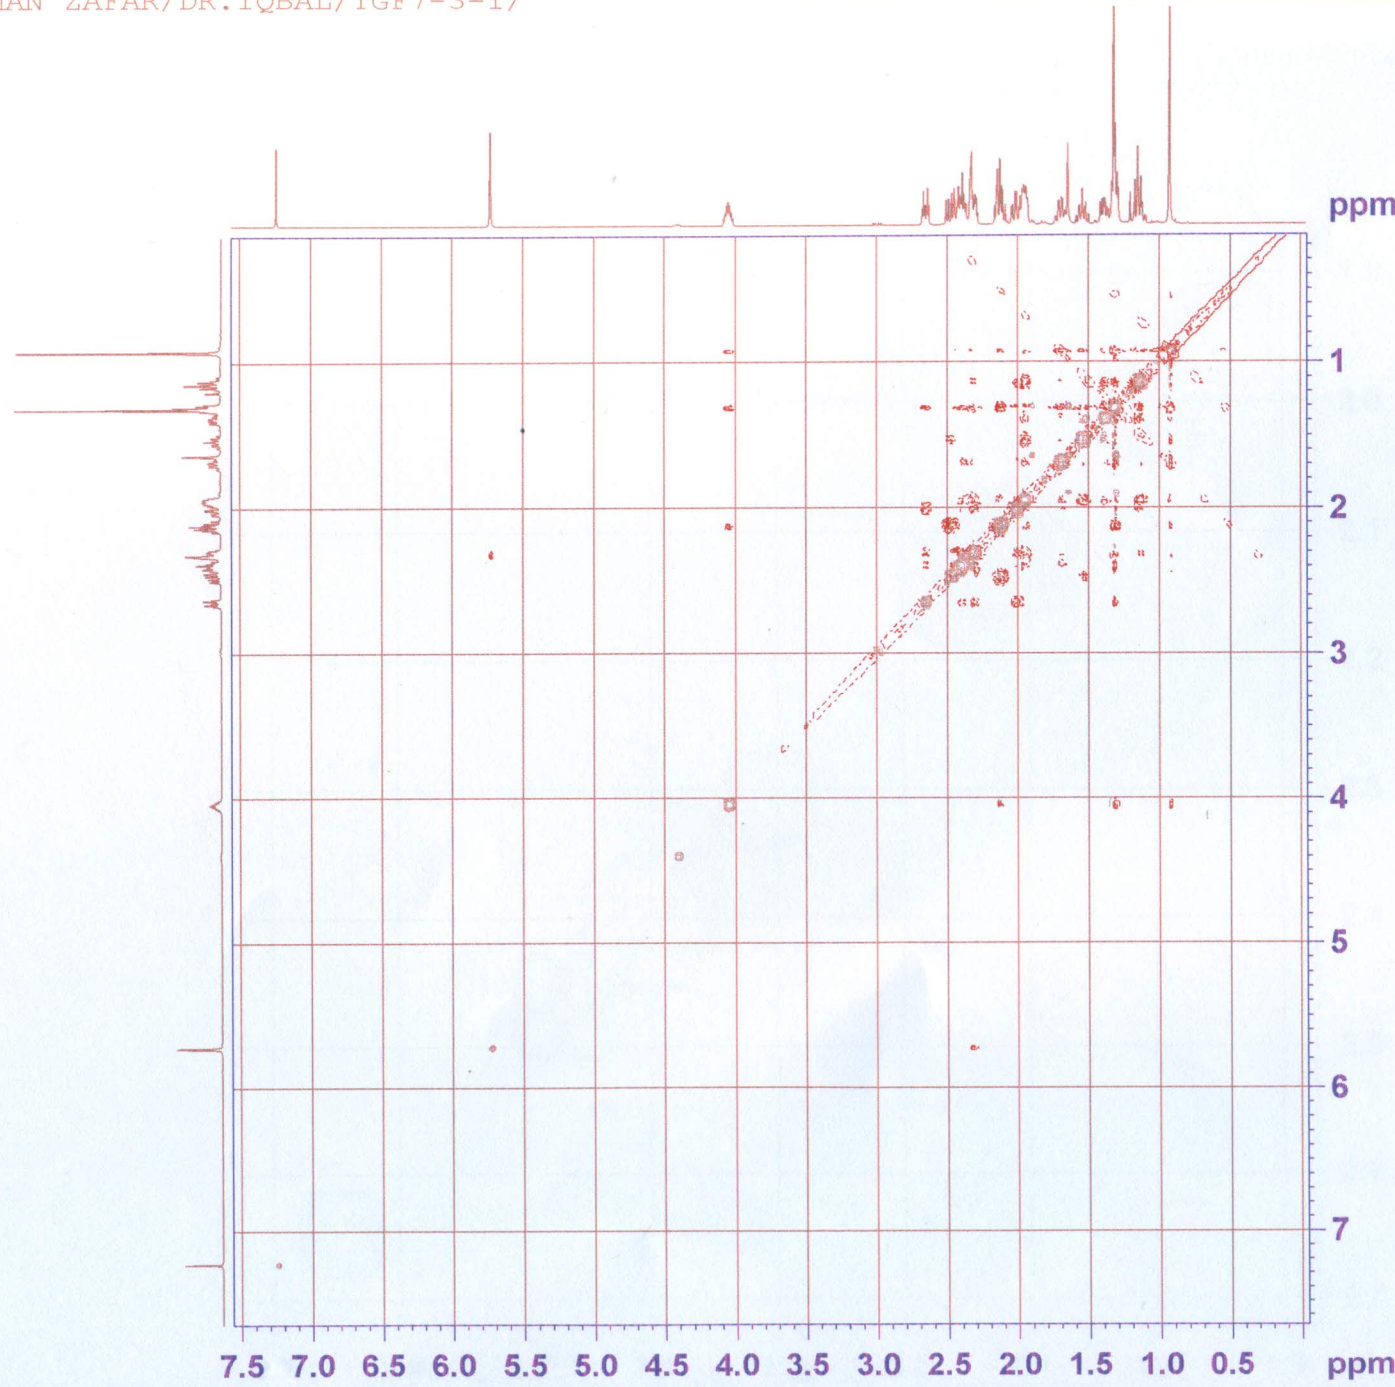

NAME oct27  
EXPNO 10  
PROCNO 1  
Date\_ 20091027  
Time\_ 13.02  
INSTRUM spect  
PROBHD 5 mm BBI 1H-BB  
PULPROG noesygp  
TD 2048  
SOLVENT CDCl3  
NS 16  
DS 2  
SWH 4006.410 Hz  
FIDRES 1.956255 Hz  
AQ 0.2557652 sec  
RG 1625.5  
DW 124.800 usec  
DE 6.50 usec  
TE 304.1 K  
D0 0.00011627 sec  
D1 1.50000000 sec  
D8 0.80000001 sec  
D16 0.00020000 sec  
INO 0.00024960 sec

===== CHANNEL f1 =====  
NUC1 1H  
P1 6.70 usec  
P2 13.40 usec  
PL1 6.00 dB  
SFO1 500.1320005 MHz

===== GRADIENT CHANNEL =====  
GPNAM1 SINE.100  
GPNAM2 SINE.100  
GPZ1 40.00 %  
GPZ2 -40.00 %  
P16 1000.00 usec  
NDO 1  
TD 256  
SFO1 500.132 MHz  
FIDRES 15.650039 Hz  
SW 8.011 ppm  
FrMODE States-TPPI  
SI 1024  
SF 500.1300232 MHz  
WDW QSINE  
SSB 2  
LB 0.00 Hz  
GB 0  
PC 4.00  
SI 1024  
MC2 States-TPPI  
SF 500.1300232 MHz  
WDW QSINE  
SSB 2  
LB 0.00 Hz  
GB 0
