# Supplementary material for: Molecular docking simulation studies on potent butyrylcholinesterase inhibitors obtained from microbial transformation of dihydrotestosterone
Source: PubMed Central journal article supplement (PMC4126177; doi:10.1186/1752-153x-7-164), 2013-10-08
Supplement: 1752-153X-7-164-S8.pdf [file 1752-153X-7-164-S8.pdf]

AVANCE 400-A  
LAB. No. 109

Salman/Dr, Iqbal/TGF7-3-3/

7.240  
7.023  
6.998  
6.237  
6.212  
6.072  
6.037  
4.374  
4.354  
4.034  
3.298  
2.948  
2.928  
2.486  
2.474  
2.452  
2.441  
2.418  
2.385  
2.348  
2.031  
2.003  
1.983  
1.913  
1.896  
1.863  
1.833  
1.801  
1.773  
1.754  
1.676  
1.654  
1.644  
1.621  
1.549  
1.506  
1.491  
1.477  
1.460  
1.403  
1.370  
1.336  
1.315  
1.237  
1.200  
1.192  
1.131  
1.101  
1.019  
0.909  
0.898  
0.878  
0.802

NAME Oct09  
EXPNO 2  
PROCNO 1  
Date\_ 20091009  
Time\_ 9.58  
INSTRUM spect  
PROBHD 5 mm Dual 13C/  
PULPROG zg30  
TD 32768  
SOLVENT CDCl3  
NS 128  
DS 0  
SWH 8012.820 Hz  
FIDRES 0.244532 Hz  
AQ 2.0447731 sec  
RG 512  
DM 62.400 usec  
DE 6.50 usec  
TE 300.2 K  
D1 1.00000000 sec  
TD0 1

==== CHANNEL f1 =====  
NUC1 1H  
P1 8.10 usec  
PL1 4.00 dB  
SF01 400.2328016 MHz  
SI 16384  
SF 400.2300132 MHz  
WDW EM  
SSB 0  
LB 0.30 Hz  
GB 0  
PC 2.00

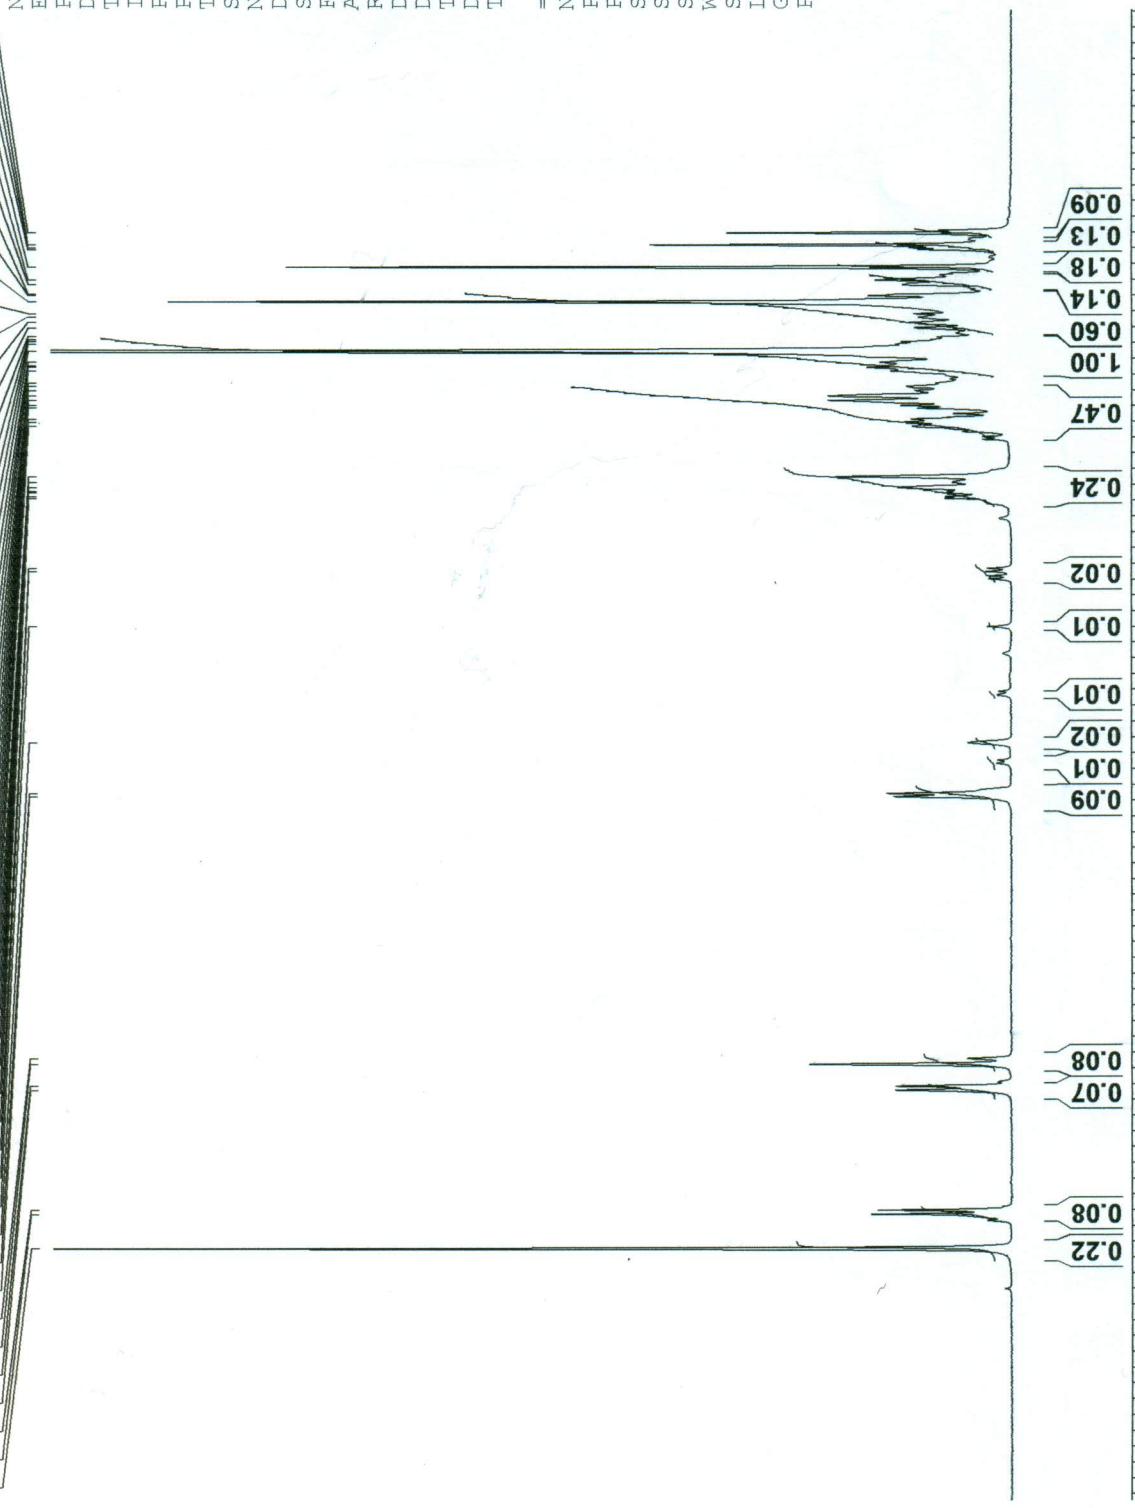

Sample: TGF733

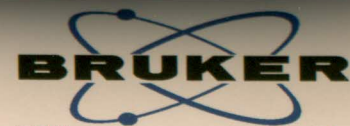

NAME  
EXPNO 1  
PROCNO 1  
Date 20091028  
Time 22.20  
INSTRUM spect  
PROBHD 5 mm CPTCI 1H-  
PULPROG zgpg  
TD 65536  
SOLVENT CDCl3  
NS 12288  
DS 2  
SWH 35971.223 Hz  
FIDRES 0.548877 Hz  
AQ 0.9110143 sec  
RG 32768  
DW 13.900 usec  
DE 6.50 usec  
TE 294.0 K  
D1 1.5000000 sec  
D11 0.03000000 sec  
TD0 12

===== CHANNEL f1 =====  
NUC1 13C  
P1 16.00 usec  
PL1 2.00 dB  
PL1W 66.40702820 W  
SFO1 150.9453107 MHz

===== CHANNEL f2 =====  
CPDPRG2 waltz16  
NUC2 1H  
PCPD2 65.00 usec  
PL2 3.30 dB  
PL12 22.06 dB  
PL13 27.00 dB  
PL2W 9.16420078 W  
PL12W 0.12192553 W  
PL13W 0.03909260 W  
SFO2 600.2336014 MHz  
SI 32768  
SF 150.9279540 MHz  
WDW EM  
SSB 0  
LB 1.00 Hz  
GB 0  
PC 1.40

ANALYST: [illegible]  
DATE: 20091028

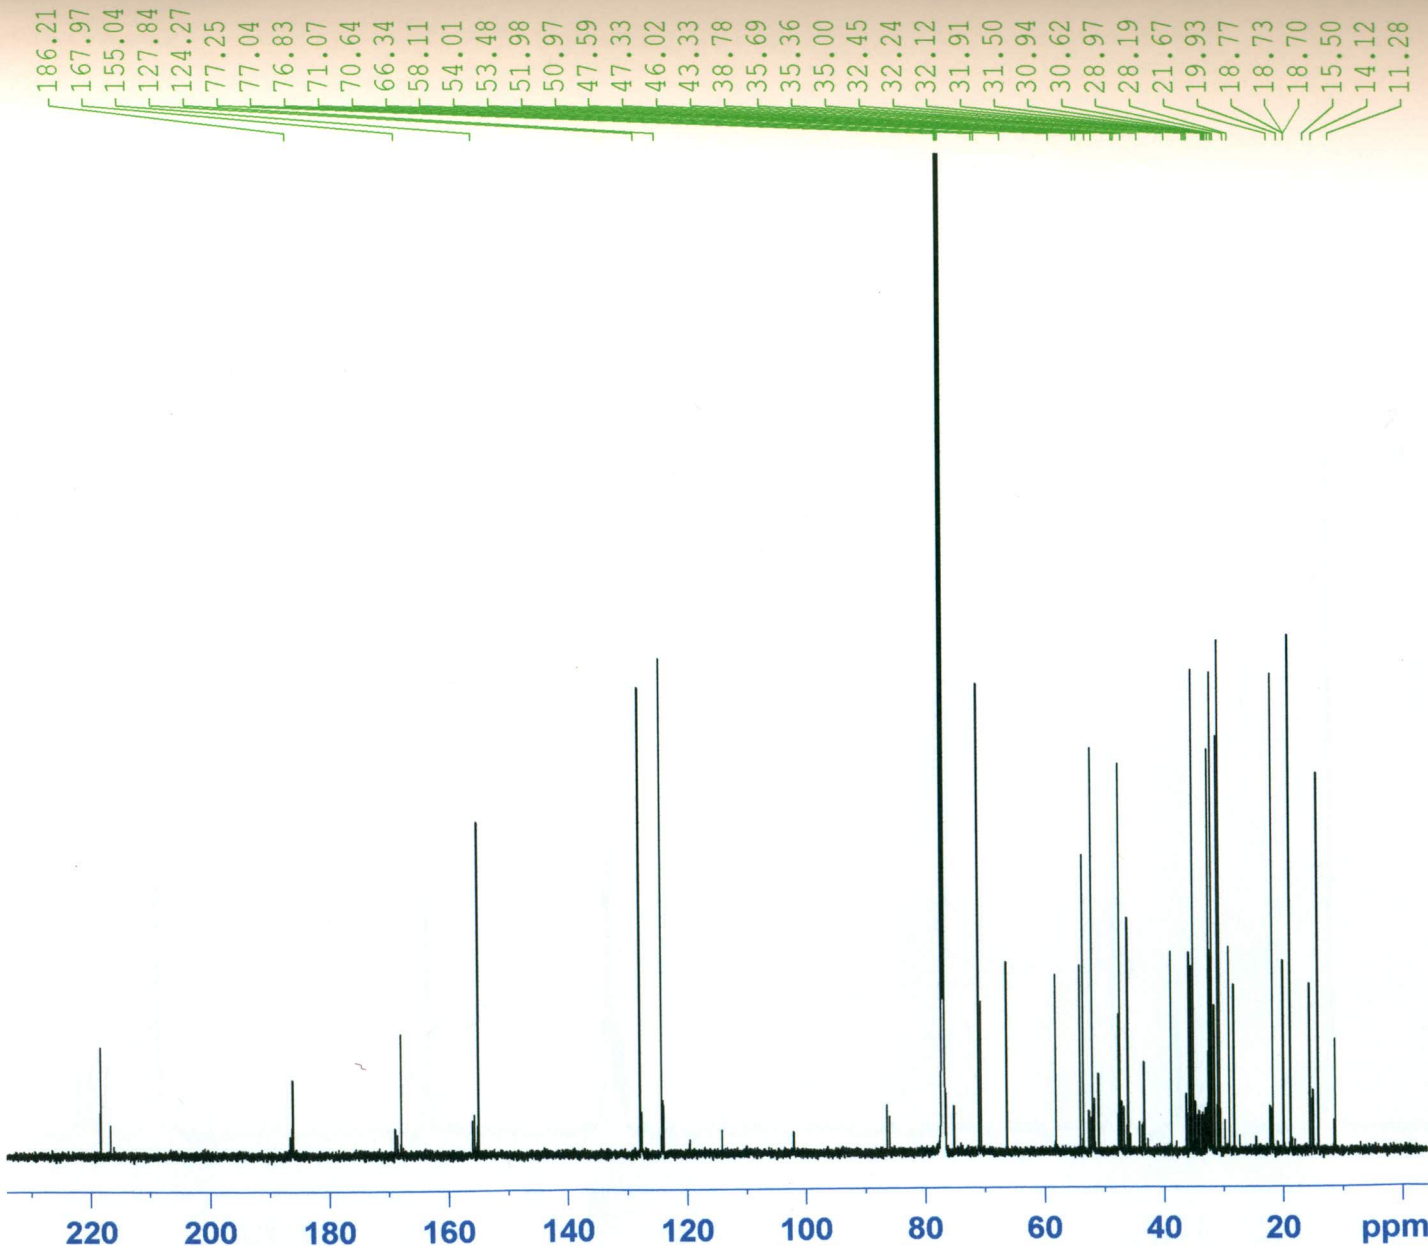

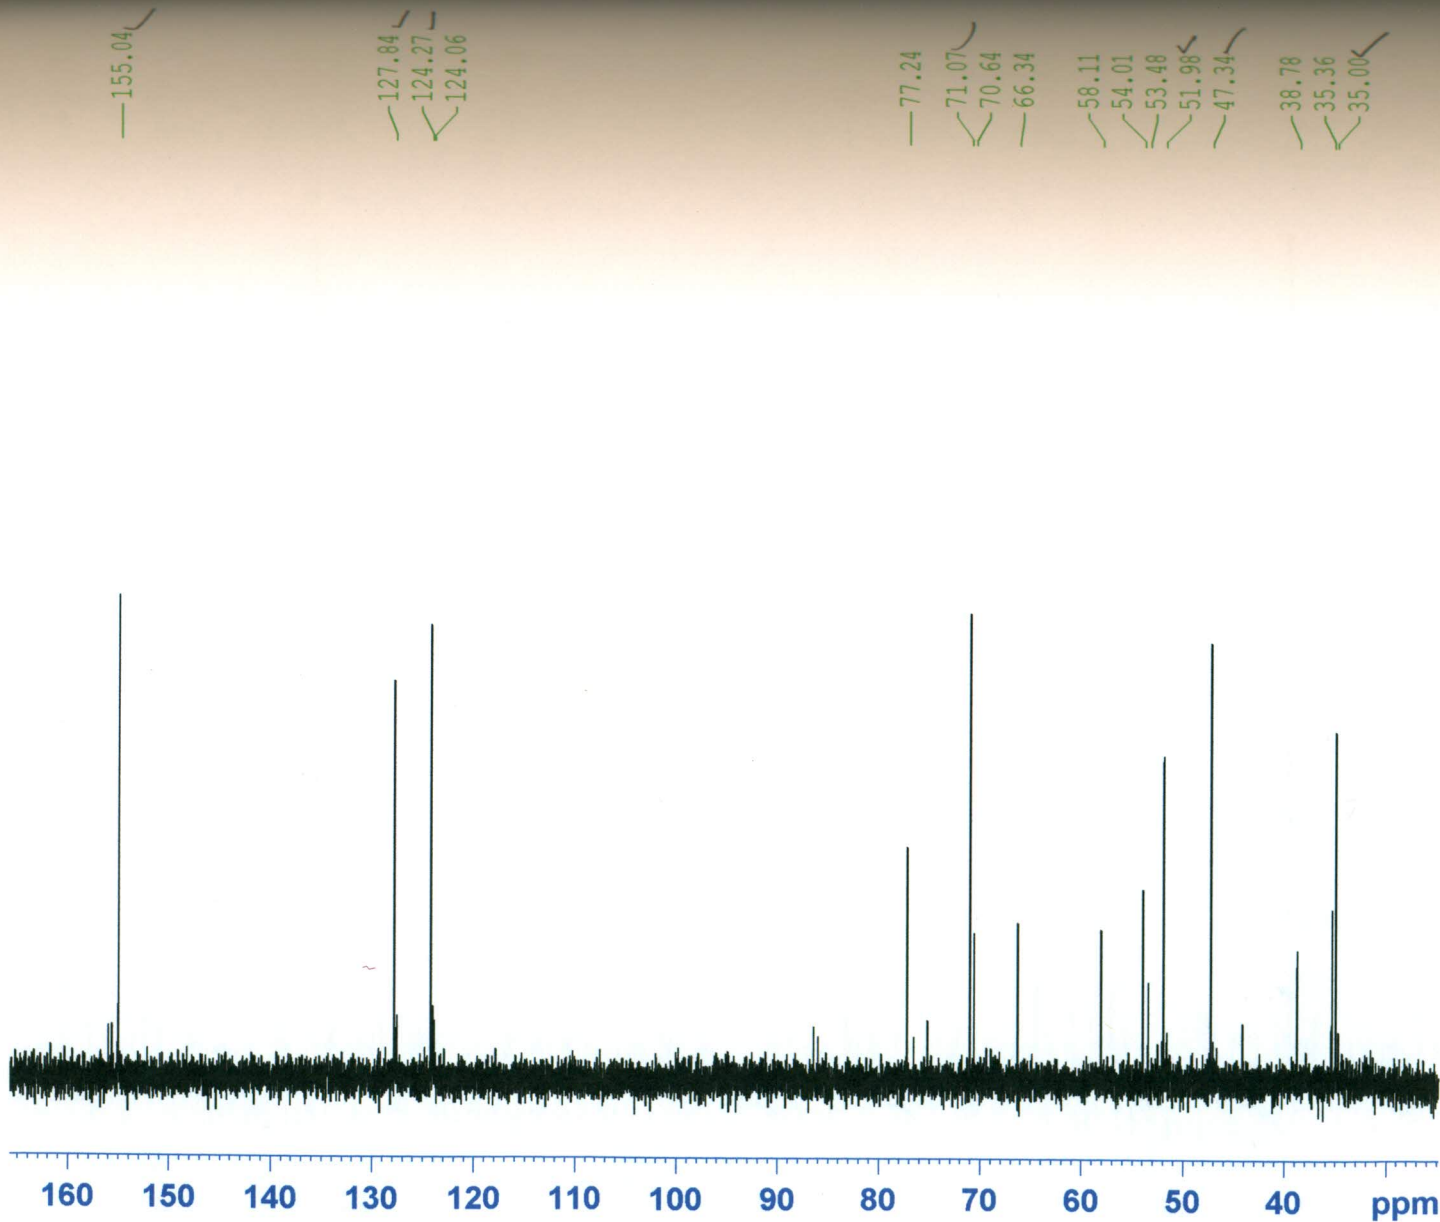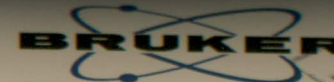

AVANCE AV 300  
LAB. NO. 103

NAME  
EXPNO 8  
PROCNO 1  
Date 20091029  
Time 8.30  
INSTRUM spect  
PROBHD 5 mm CPTCI 1H-  
PULPROG deptsp90  
TD 65536  
SOLVENT CDC13  
NS 404  
DS 2  
SWH 30303.031 Hz  
FIDRES 0.462388 Hz  
AQ 1.0814105 sec  
RG 32768  
DW 16.500 usec  
DE 6.50 usec  
TE 293.7 K  
CNST2 145.0000000  
D1 1.50000000 sec  
D2 0.00344828 sec  
D12 0.00002000 sec  
TD0 6

===== CHANNEL f1 =====  
NUC1 13C  
P1 16.00 usec  
P12 2000.00 usec  
PL0 120.00 dB  
PL1 2.00 dB  
PLOW 0.00000000 W  
PL1W 66.40702820 W  
SFO1 150.9430463 MHz  
SP2 1.99 dB  
SPNAM2 Crp60comp.4  
SPOAL2 0.500  
SPOFFS2 0.00 Hz

===== CHANNEL f2 =====  
CPDPRG2 waltz16  
NUC2 1H  
P3 7.50 usec  
P4 15.00 usec  
PCPD2 65.00 usec  
PL2 3.30 dB  
PL12 22.06 dB  
PL2W 9.16420078 W  
PL12W 0.12192553 W  
SFO2 600.2324009 MHz  
SI 32768  
SF 150.9279540 MHz  
WDW EM  
SSB 0  
LB 1.00 Hz  
GB 0  
PC 1.40

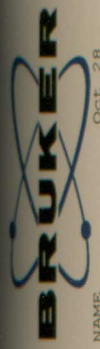

NAME \_\_\_\_\_  
 EXPRNO 1  
 PROCNO 20091029  
 Date 6.50  
 Time 6.50  
 INSTRUM spect  
 PROBD 5 mm CPTCI 1H-  
 PULPROG deptspl35  
 TD 65536  
 SOLVENT CDCl3  
 NS 2917  
 DS 2  
 SWH 30303.031 Hz  
 FIDRES 0.462388 Hz  
 AQ 1.0814105 sec  
 RG 32768  
 DW 16.500 usec  
 DE 6.50 usec  
 TE 293.4 K  
 CNST2 145.0000000  
 D1 1.5000000 sec  
 D2 0.00344828 sec  
 D12 0.00002000 sec  
 TDO 6

AVANCE AV 600  
 LAB. No. 106

CHANNEL f1 =====  
 NUC1 13C  
 P1 16.00 usec  
 P2 2000.00 usec  
 PLO 120.00 dB  
 PL1 2.00 dB  
 PLOW 0.0000000 W  
 PL1W 66.40702820 W  
 SFO1 150.9430463 MHz  
 SP2 1.99 dB  
 SFO2 150.9430463 MHz  
 SFOAL2 0.500  
 SPOFFS2 0.00 Hz

CHANNEL f2 =====  
 CPDPRG2 waltz16  
 NUC2 1H  
 P3 7.50 usec  
 P4 15.00 usec  
 PCPD2 65.00 usec  
 PL2 3.30 dB  
 PL12 22.06 dB  
 PL2W 9.16420078 W  
 PL12W 0.12192553 W  
 SFO2 600.2324009 MHz  
 S1 32768  
 SF 150.9279540 MHz  
 WDW EM  
 SSB 0  
 LB 1.00 Hz  
 GB 0  
 PC 1.40

155.05  
 127.84  
 124.27  
 77.25  
 71.07  
 70.64  
 66.34  
 58.11  
 54.01  
 53.48  
 51.98  
 50.97  
 47.34  
 46.02  
 38.78  
 35.69  
 35.36  
 35.00  
 32.45  
 32.24  
 32.12  
 31.91  
 31.50  
 30.94  
 30.62  
 28.97

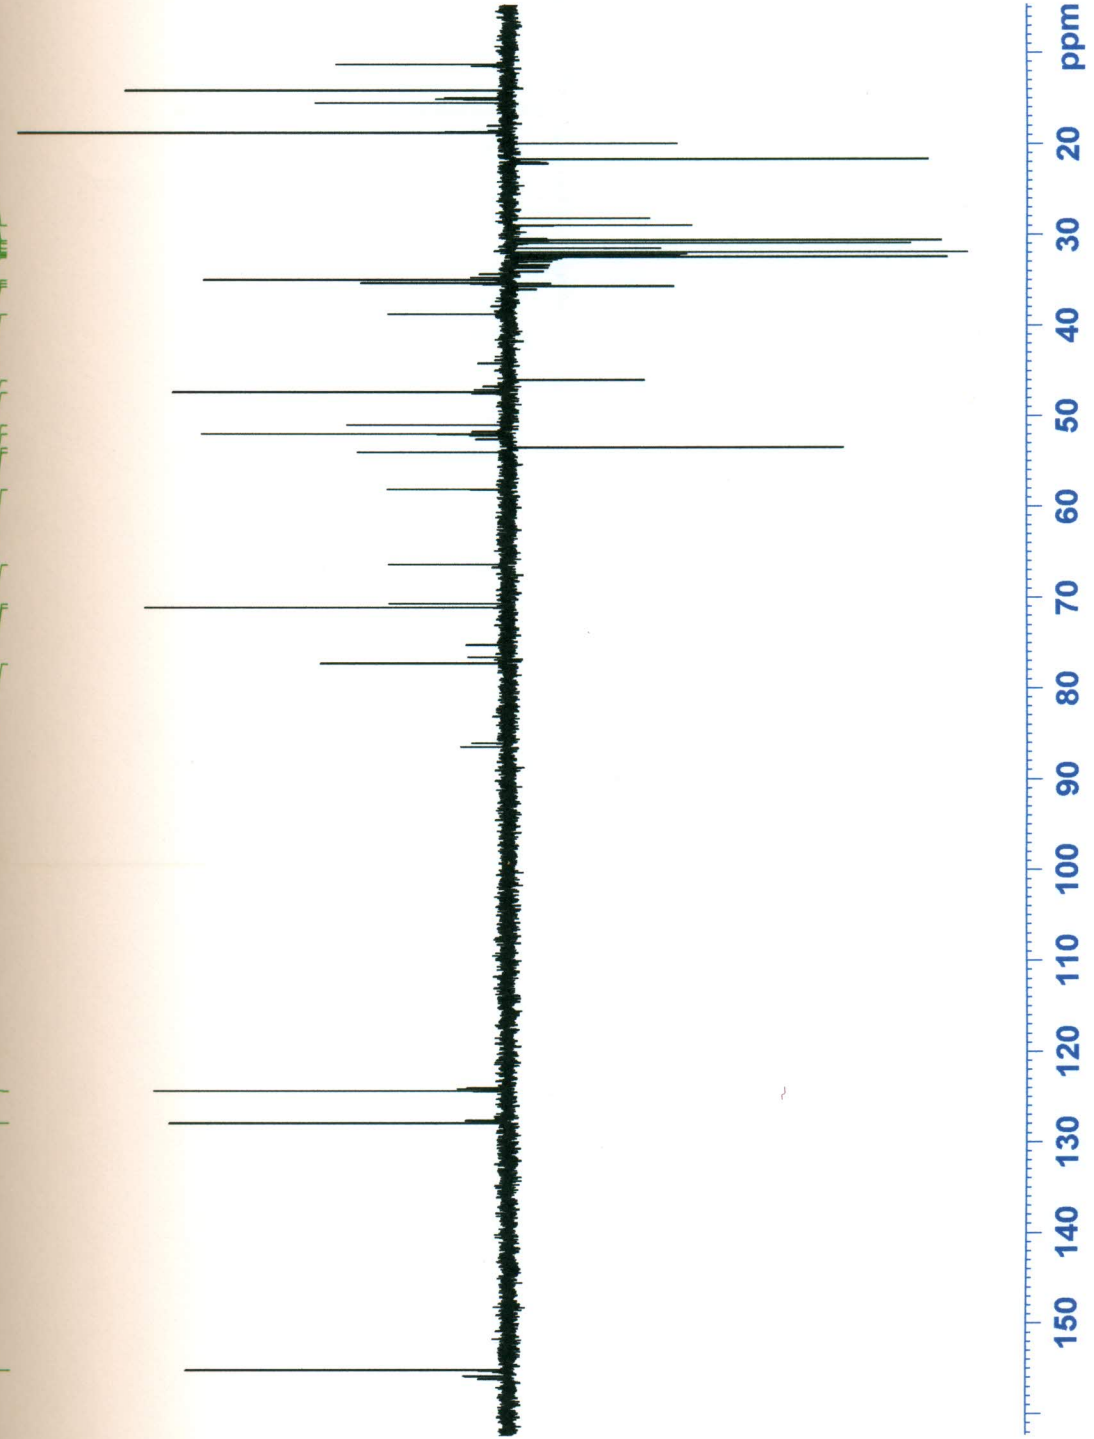

Sample: IGF733

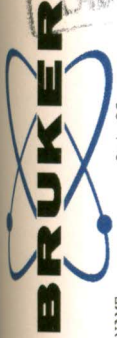

AVANCE AV 600  
LAB 40 108

NAME Oct 28  
EXPNO 5  
PROCNO 1  
Date\_ 20091028  
Time\_ 17.07  
INSTRUM spect  
PROBHD 5 mm CPTCI 1H-  
PULPROG hmbcggplpndgf  
TD 4096  
SOLVENT CDCl3  
NS 32  
DS 8  
SWH 4807.692 Hz  
FIDRES 1.173753 Hz  
AQ 0.4261380 sec  
RG 46341  
DW 104.000 usec  
DE 6.50 usec  
TE 294.5 K  
CNST2 145.0000000  
CNST13 13.0000000  
D0 0.00000300 sec  
D1 1.50000000 sec  
D2 0.00344828 sec  
D6 0.03846154 sec  
D16 0.00015000 sec  
INO 0.00001440 sec

==== CHANNEL f1 =====  
NUC1 1H  
P1 7.40 usec  
P2 14.80 usec  
PL1 3.50 dB  
PL1W 9.16420078 W  
SFO1 600.2325210 MHz

==== CHANNEL f2 =====  
NUC2 13C  
P3 10.00 usec  
PL2 2.00 dB  
PL2W 66.40702820 W  
SFO2 150.9453107 MHz

==== GRADIENT CHANNEL =====  
GENAM1 SINE.100  
GENAM2 SINE.100  
GENAM3 SINE.100  
GPZ1 50.00 %  
GPZ2 30.00 %  
GPZ3 40.10 %  
P16 2000.00 usec  
NDO 2  
TD 256  
SFO1 150.9453 MHz  
FIDRES 135.614529 Hz  
SW 230.000 ppm  
FMODE QF  
SI 1024  
SF 600.2300250 MHz  
SINE 0  
SSB 0  
LB 0.00 Hz  
GB 0  
PC 1.40  
SI 1024  
MC2 QF  
SF 150.9279540 MHz  
SINE 0  
LB 0  
GB 0.00 Hz

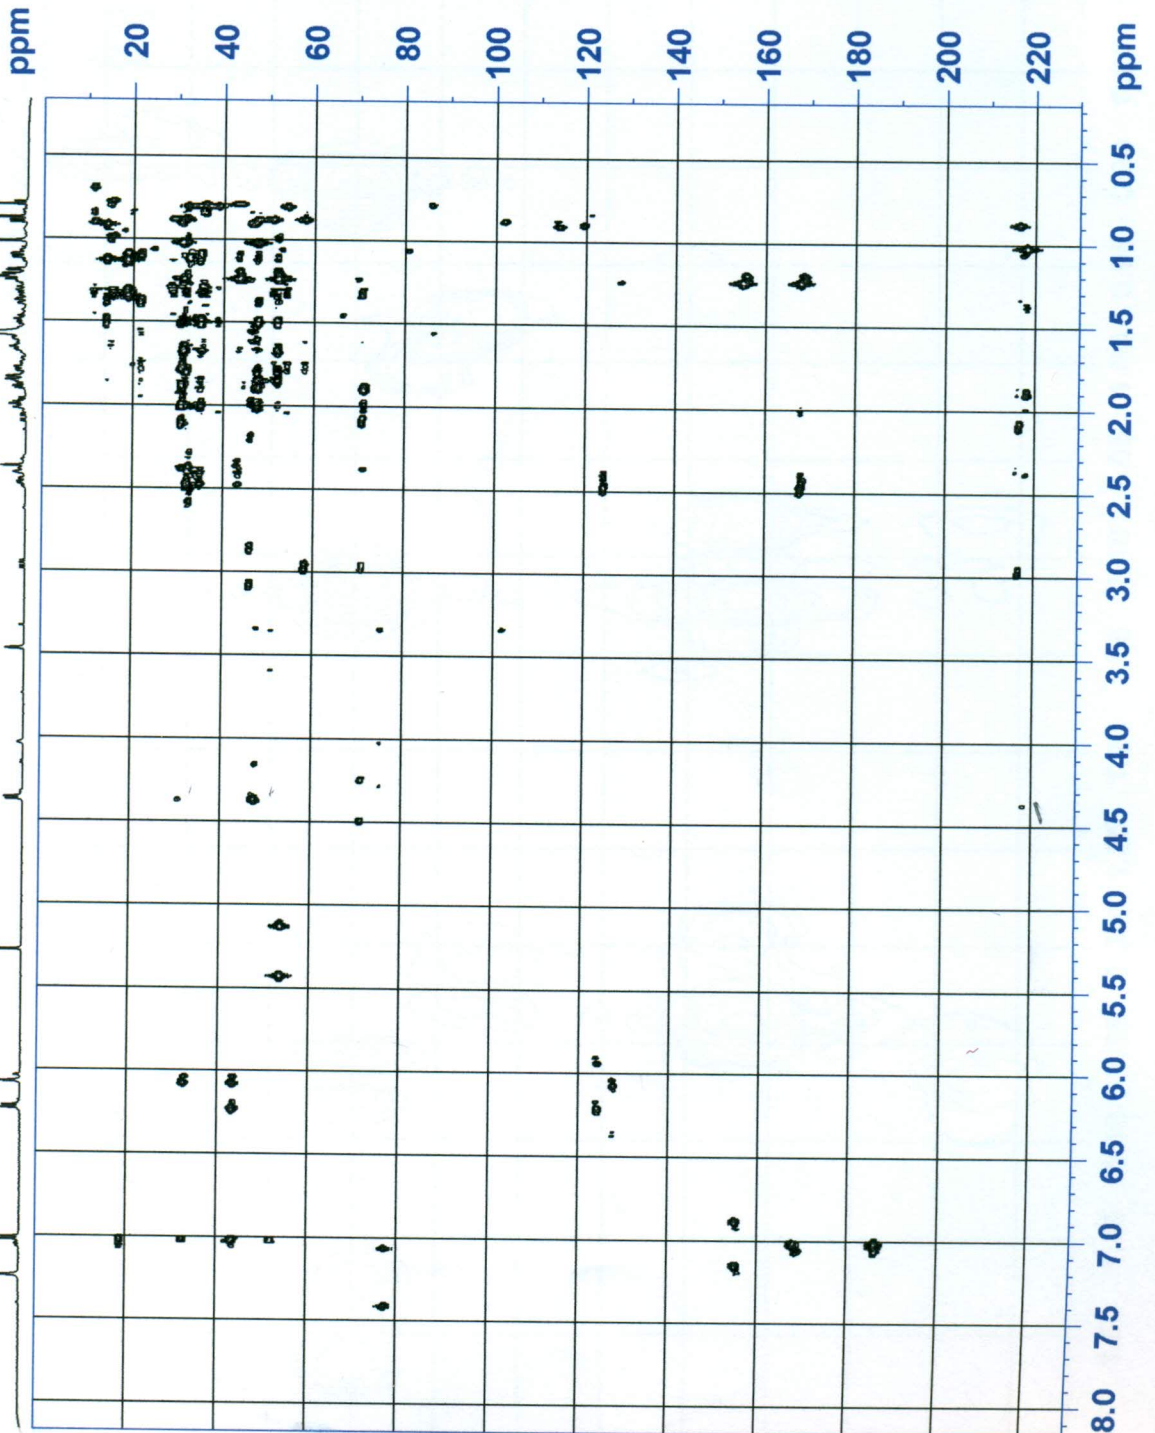

**BRUKER**

ADVANCE AV 600  
LAB. No. 108

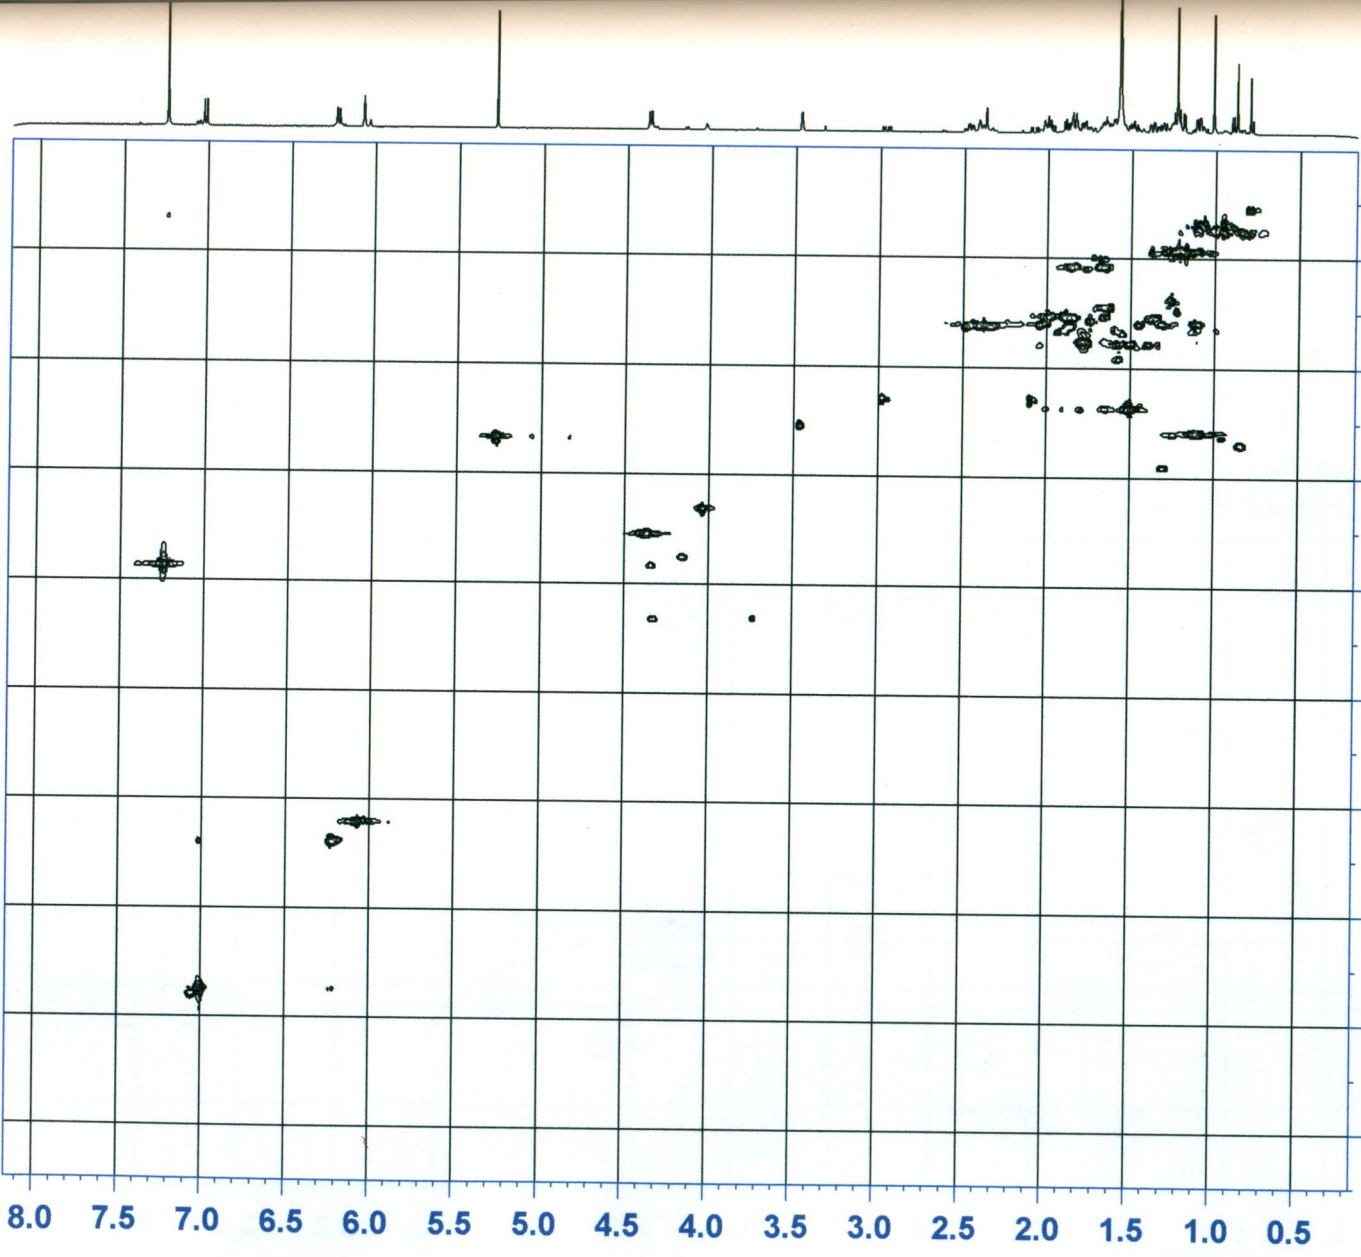

ppm

20

40

60

80

100

120

140

160

180

8.0 7.5 7.0 6.5 6.0 5.5 5.0 4.5 4.0 3.5 3.0 2.5 2.0 1.5 1.0 0.5 ppm

NAME Oct 28  
EXPNO 4  
PROCNO 1  
Date 20091028  
Time 13.24  
INSTRUM spect  
PROBHD 5 mm CPTCI 1H-  
PULPROG hsqcqtpsi  
TD 1024  
SOLVENT CDCl3  
NS 32  
DS 8  
SWH 4807.692 Hz  
FIDRES 4.695012 Hz  
AQ 0.1066500 sec  
RG 46341  
DW 104.000 usec  
DE 6.50 usec  
TE 294.5 K  
CNST2 145.0000000  
D0 0.00000300 sec  
D1 1.50000000 sec  
D4 0.00172414 sec  
D11 0.03000000 sec  
D13 0.00000400 sec  
D16 0.00015000 sec  
D24 0.00110000 sec  
IN0 0.00001745 sec  
ZGPTNS

===== CHANNEL f1 =====  
NUC1 1H  
P1 7.40 usec  
P2 14.80 usec  
P28 0.50 usec  
PL1 3.30 dB  
PL1W 9.16420078 W  
SFO1 600.2325210 MHz

===== CHANNEL f2 =====  
CPDPRG2 garp  
NUC2 13C  
P3 10.00 usec  
P4 20.00 usec  
PCPD2 60.00 usec  
PL2 2.00 dB  
PL12 17.56 dB  
PL2W 66.40702820 W  
PL12W 1.84592509 W  
SFO2 150.9422922 MHz

===== GRADIENT CHANNEL =====  
GPNAM1 SINE.100  
GPNAM2 SINE.100  
GPZ1 80.00 %  
GPZ2 20.10 %  
F16 2000.00 usec  
ND0 2  
TD 256  
SFO1 150.9423 MHz  
FIDRES 112.027481 Hz  
SW 190.000 ppm  
FnMODE Echo-Antiecho  
SI 1024  
SF 600.2300250 MHz  
WDW QSINE  
SSB 2  
LB 0.00 Hz  
GB 0  
PC 4.00  
SI 1024  
MC2 echo-antiecho  
SF 150.9279540 MHz  
WDW QSINE  
SSB 2  
LB 0.00 Hz  
GB 0

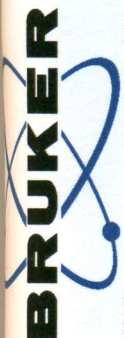

Oct 28

NAME  
 EXPNO 2  
 PROCNO 1  
 Date\_ 20091028  
 Time\_ 11.00  
 INSTRUM spect  
 PROBHD 5 mm CPTCI 1H-  
 PULPROG cosydfqf  
 TD 2048  
 SOLVENT CDC13  
 NS 8  
 DS 4  
 SWH 4807.692 Hz  
 FIDRES 2.347506 Hz  
 AQ 0.2131460 sec  
 RG 35.9  
 DW 104.000 usec  
 DE 6.50 usec  
 TE 294.4 K  
 D0 0.00000300 sec  
 D1 1.50000000 sec  
 D13 0.00000400 sec  
 D20 0.00000200 sec  
 IN0 0.00020800 sec

==== CHANNEL f1 =====  
 NUC1 1H  
 P1 7.40 usec  
 PL1 3.30 dB  
 PL1W 9.16420078 W  
 SFO1 600.2325210 MHz  
 NDO 1  
 TD 256  
 SFO1 600.2325 MHz  
 FIDRES 18.780046 Hz  
 SW 8.010 ppm  
 FhMODE QF  
 SI 1024  
 SF 600.2300250 MHz  
 WDW QSINE  
 SSB 0  
 LB 0.00 Hz  
 GB 0  
 PC 1.40  
 SI 1024  
 MC2 QF  
 SF 600.2300250 MHz  
 WDW QSINE  
 SSB 0  
 LB 0.00 Hz  
 GB 0

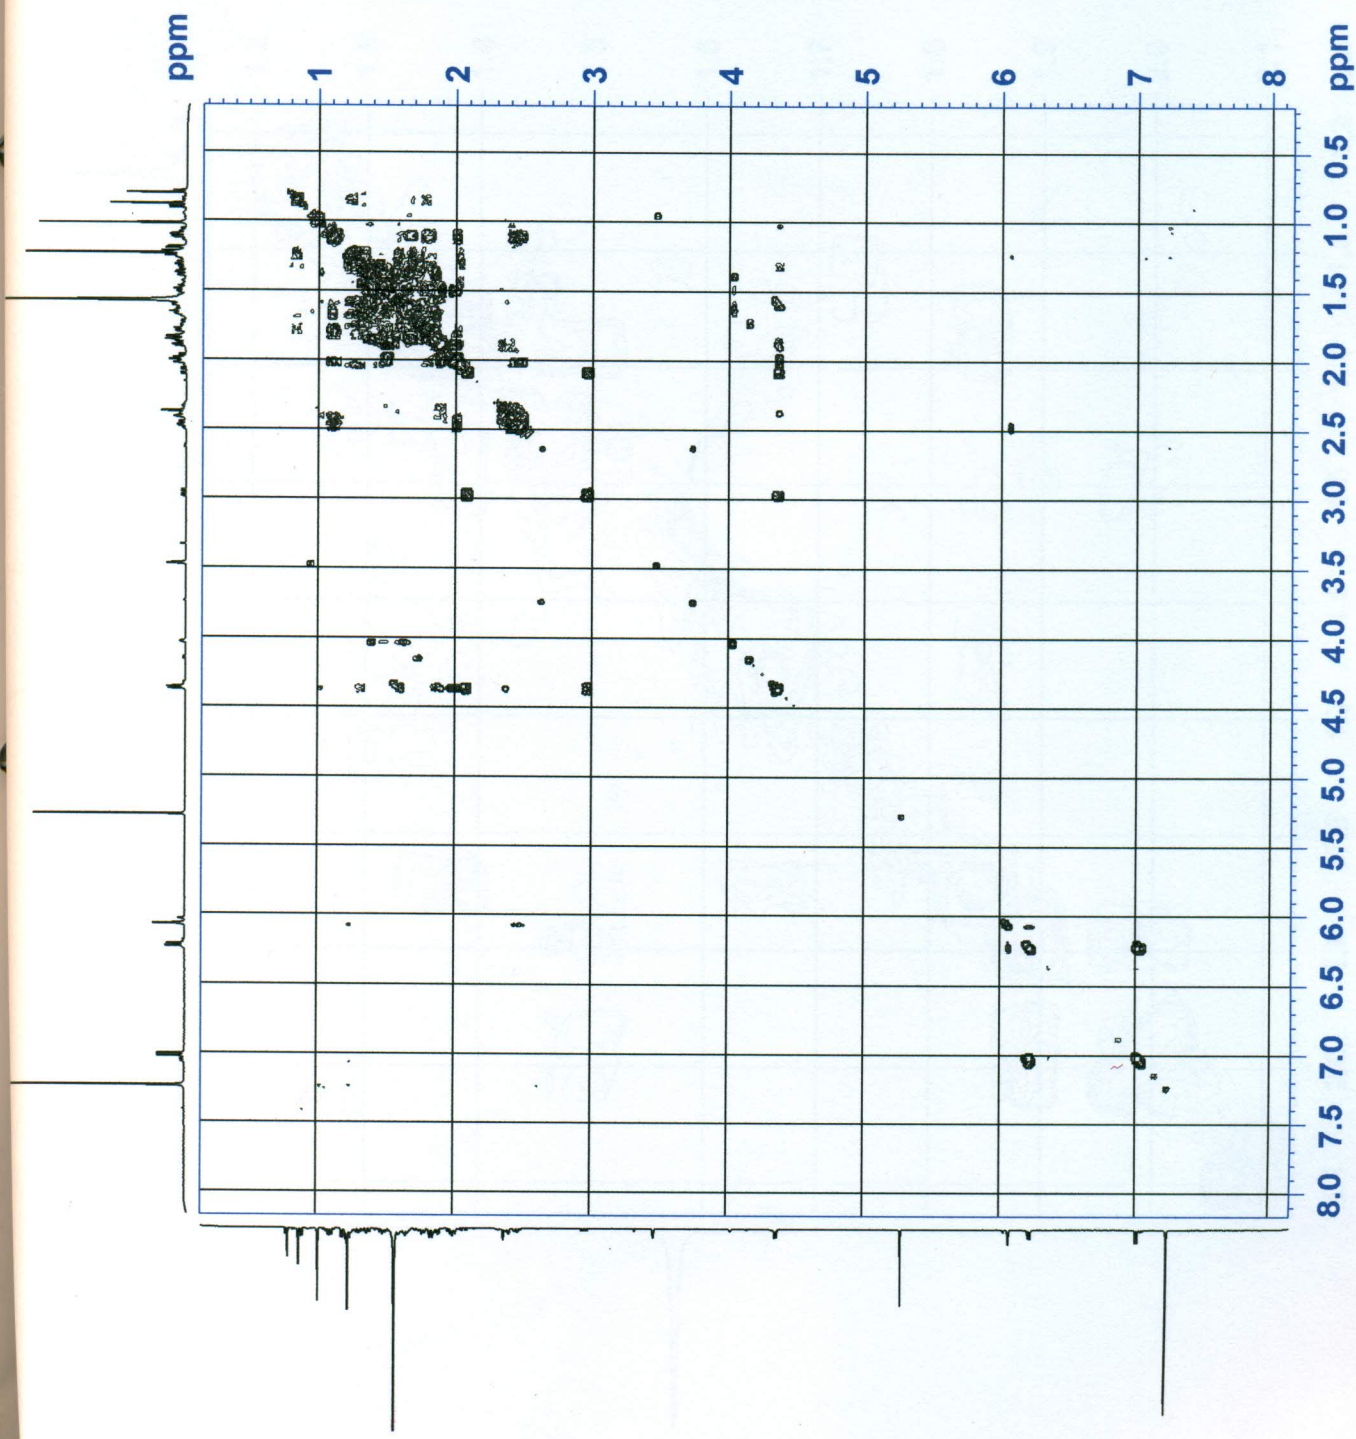

NOV 14 2009  
 No. 108

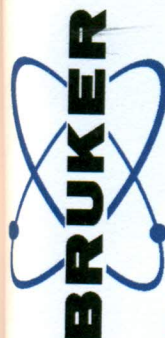

AVANCE AV 600  
LAB. No. 108

Oct 28  
NAME  
EXPNO 3  
PROCNO 1  
Date\_ 20091028  
Time\_ 12.00  
INSTRUM spect  
PROBHD 5 mm CPTCI 1H-  
PULPROG noesygpph  
TD 1024  
SOLVENT CDCl3  
NS 8  
DS 4  
SWH 4807.692 Hz  
FIDRES 4.695012 Hz  
AQ 0.1066500 sec  
RG 71.8  
DW 104.000 usec  
DE 6.50 usec  
TE 294.5 K  
D0 0.00009458 sec  
D1 1.50000000 sec  
D8 0.80000001 sec  
D16 0.00015000 sec  
INO 0.00020800 sec

==== CHANNEL f1 =====  
NUC1 1H  
P1 7.40 usec  
P2 14.80 usec  
PL1 3.30 dB  
PL1W 9.16420078 W  
SF01 600.2325210 MHz

==== GRADIENT CHANNEL =====  
GPNAM1 SINE.100  
GPNAM2 SINE.100  
GPZ1 40.00 %  
GPZ2 -40.00 %  
P16 2000.00 usec  
NDO 1  
TD 256  
SF01 600.2325 MHz  
FIDRES 18.780046 Hz  
SW 8.010 ppm  
FnMODE States-TpPI  
SI 1024  
SF 600.2300250 MHz  
WDW QSI  
SSB 2  
LB 0.00 Hz  
GB 0  
PC 1.40  
SI 1024  
MC2 States-TpPI  
SF 600.2300250 MHz  
WDW QSI  
SSB 2  
LB 0.00 Hz  
GB 0

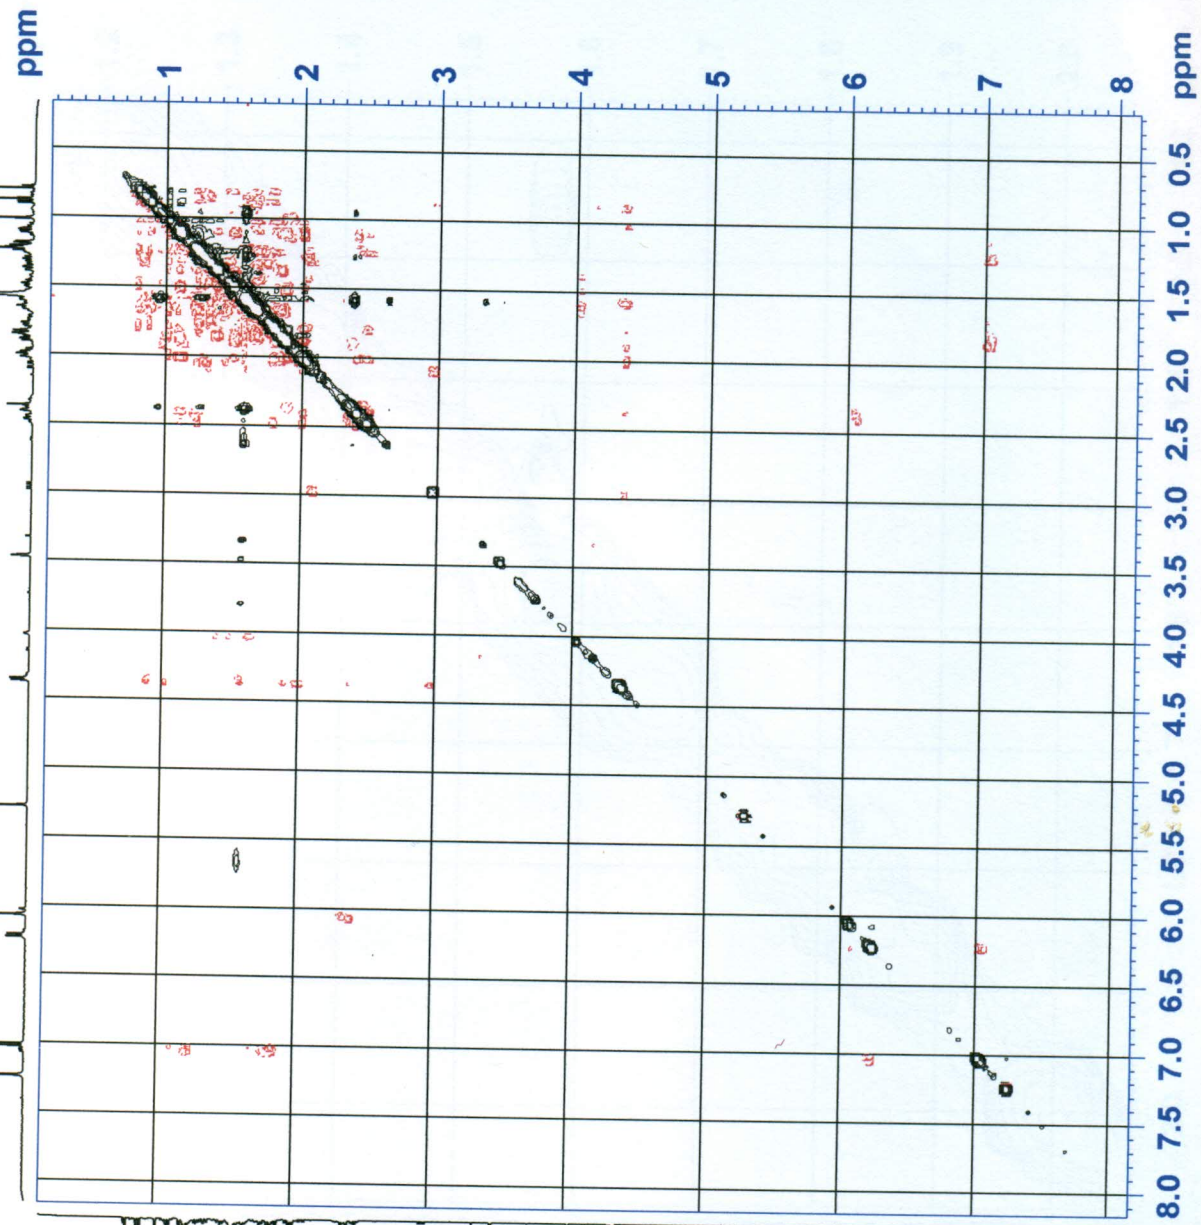

1 2 3 4 5 6 7 8 ppm
